# Supplementary material for: The integrated analysis of RNA-seq and microRNA-seq depicts miRNA-mRNA networks involved in Japanese flounder (Paralichthys olivaceus) albinism
Source: PubMed Central journal article supplement (PMC5544202; doi:10.1371/journal.pone.0181761), 2017-08-04

S1 Fig. Error rate distribution along reads in six libraries of RNA-seq.

Error rate distribution along reads (PO\_con1)

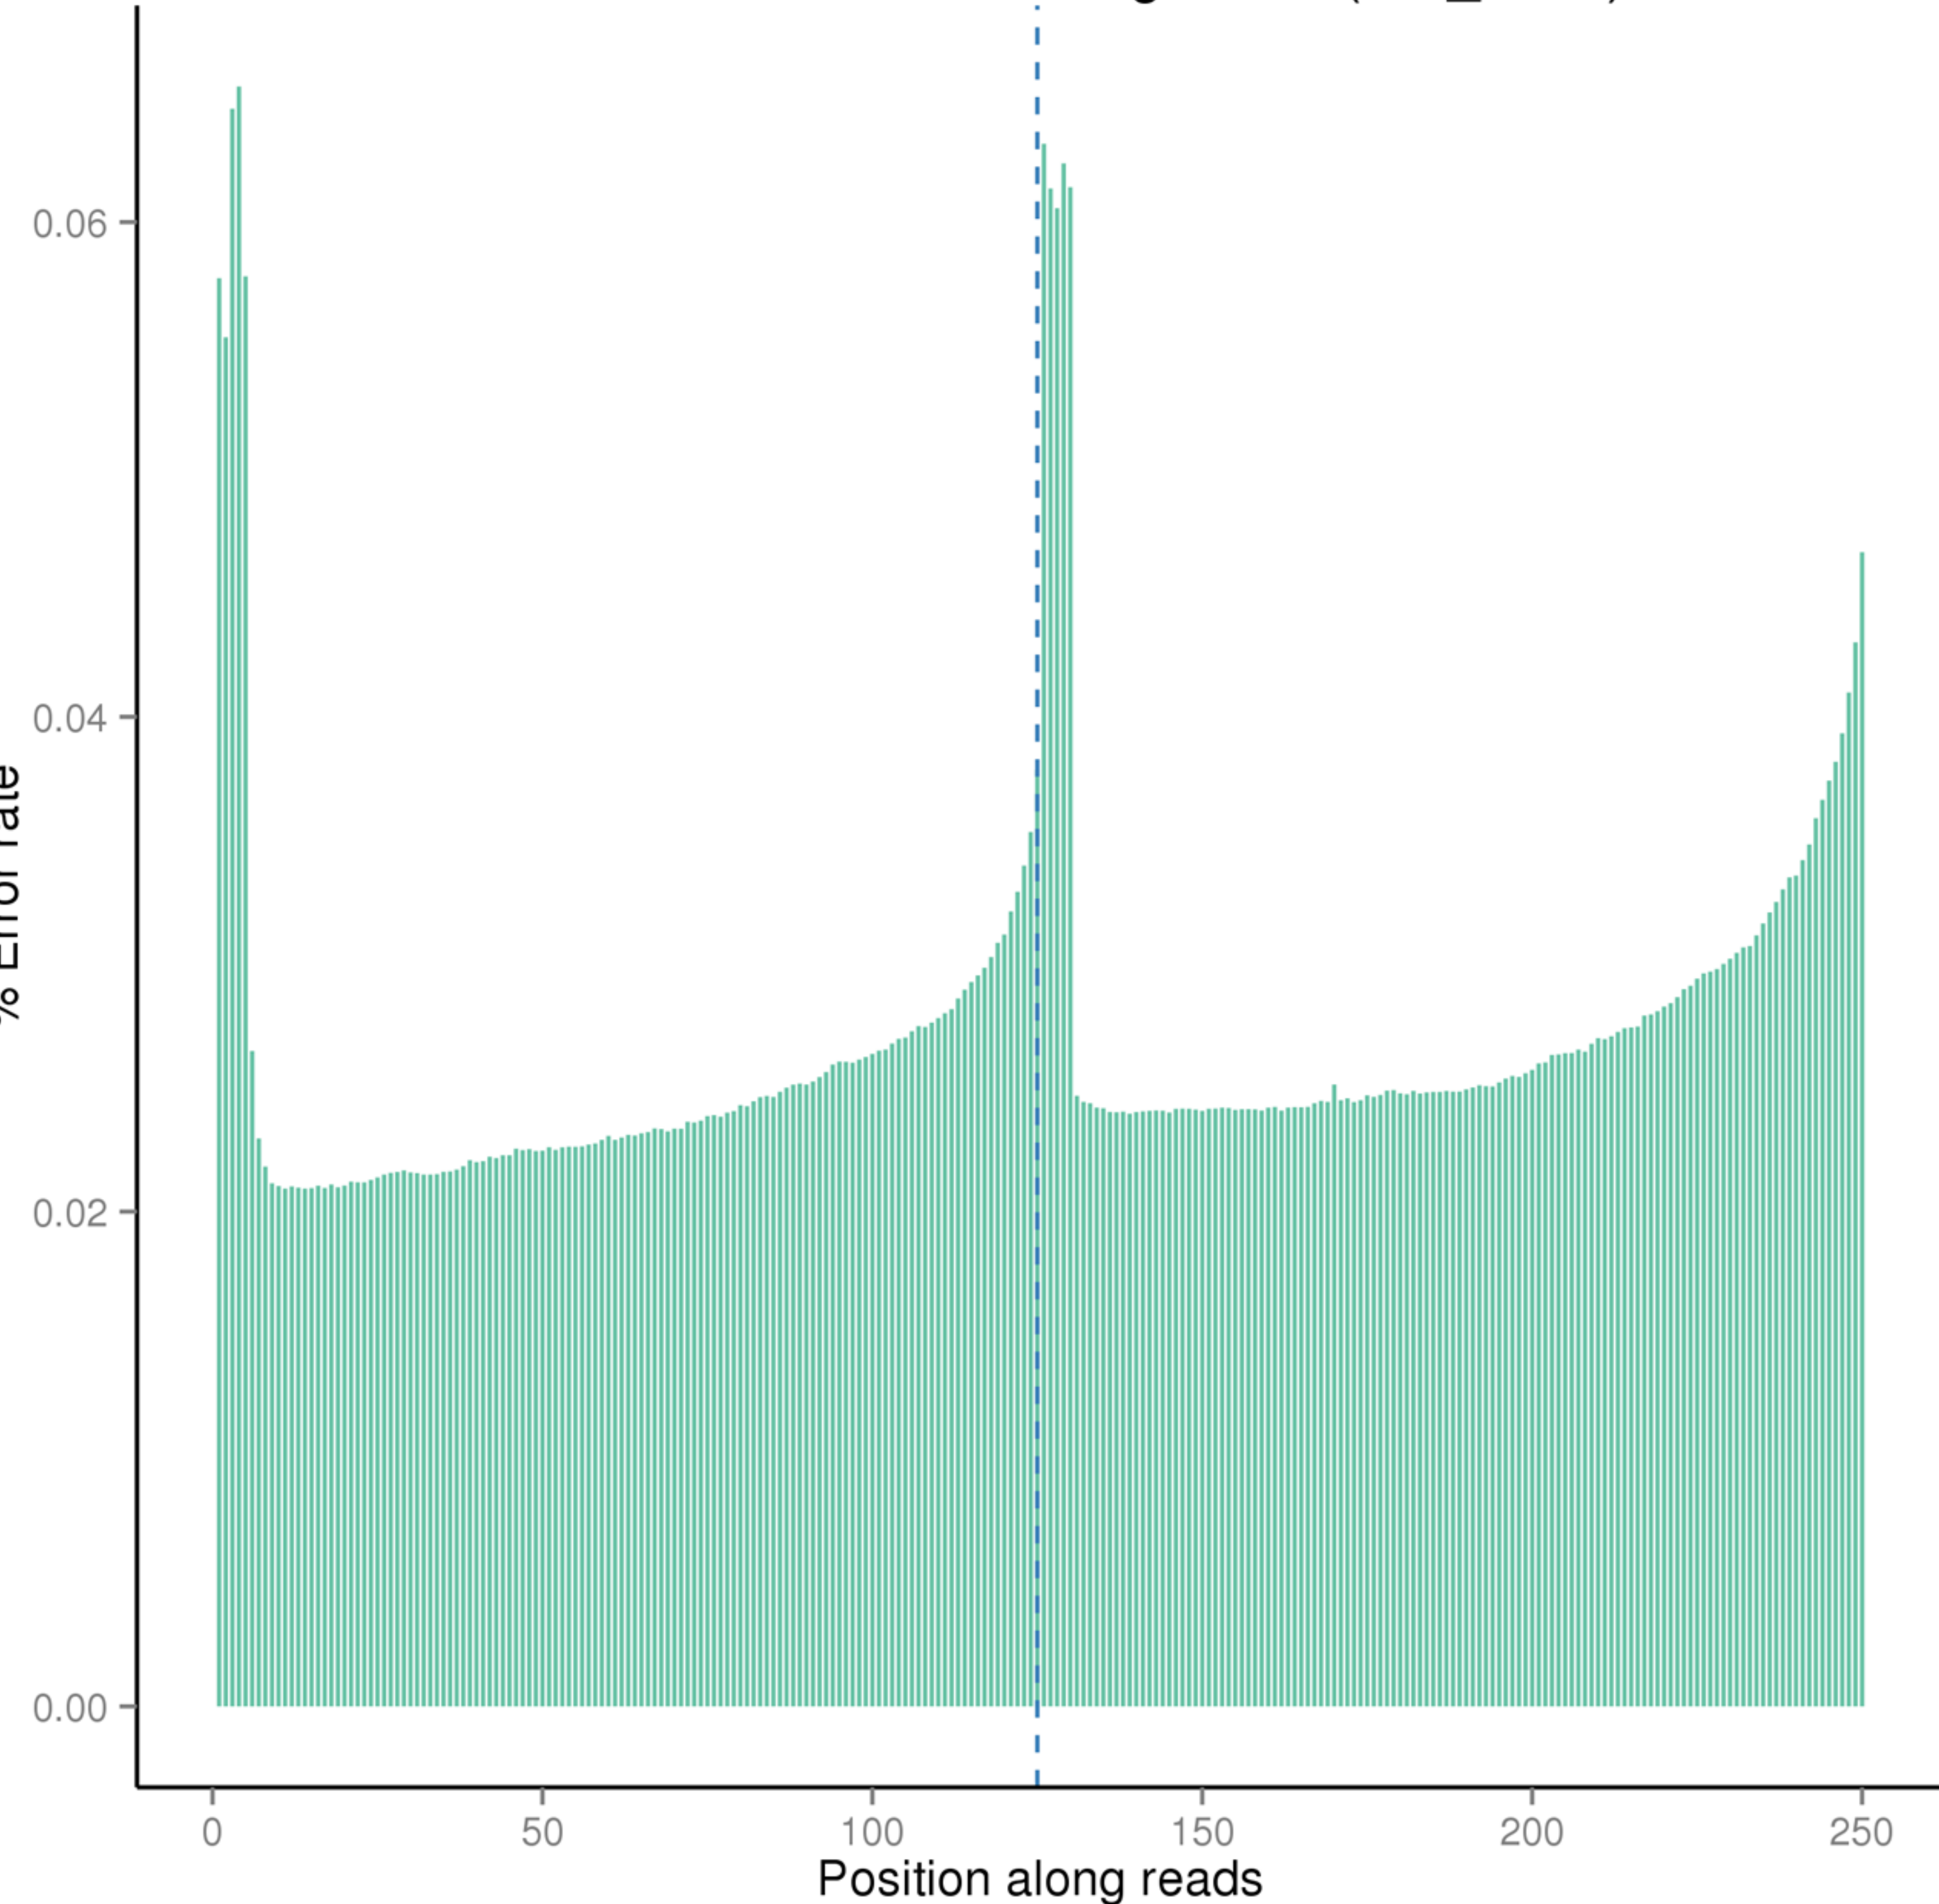

Error rate distribution along reads (PO\_con2)

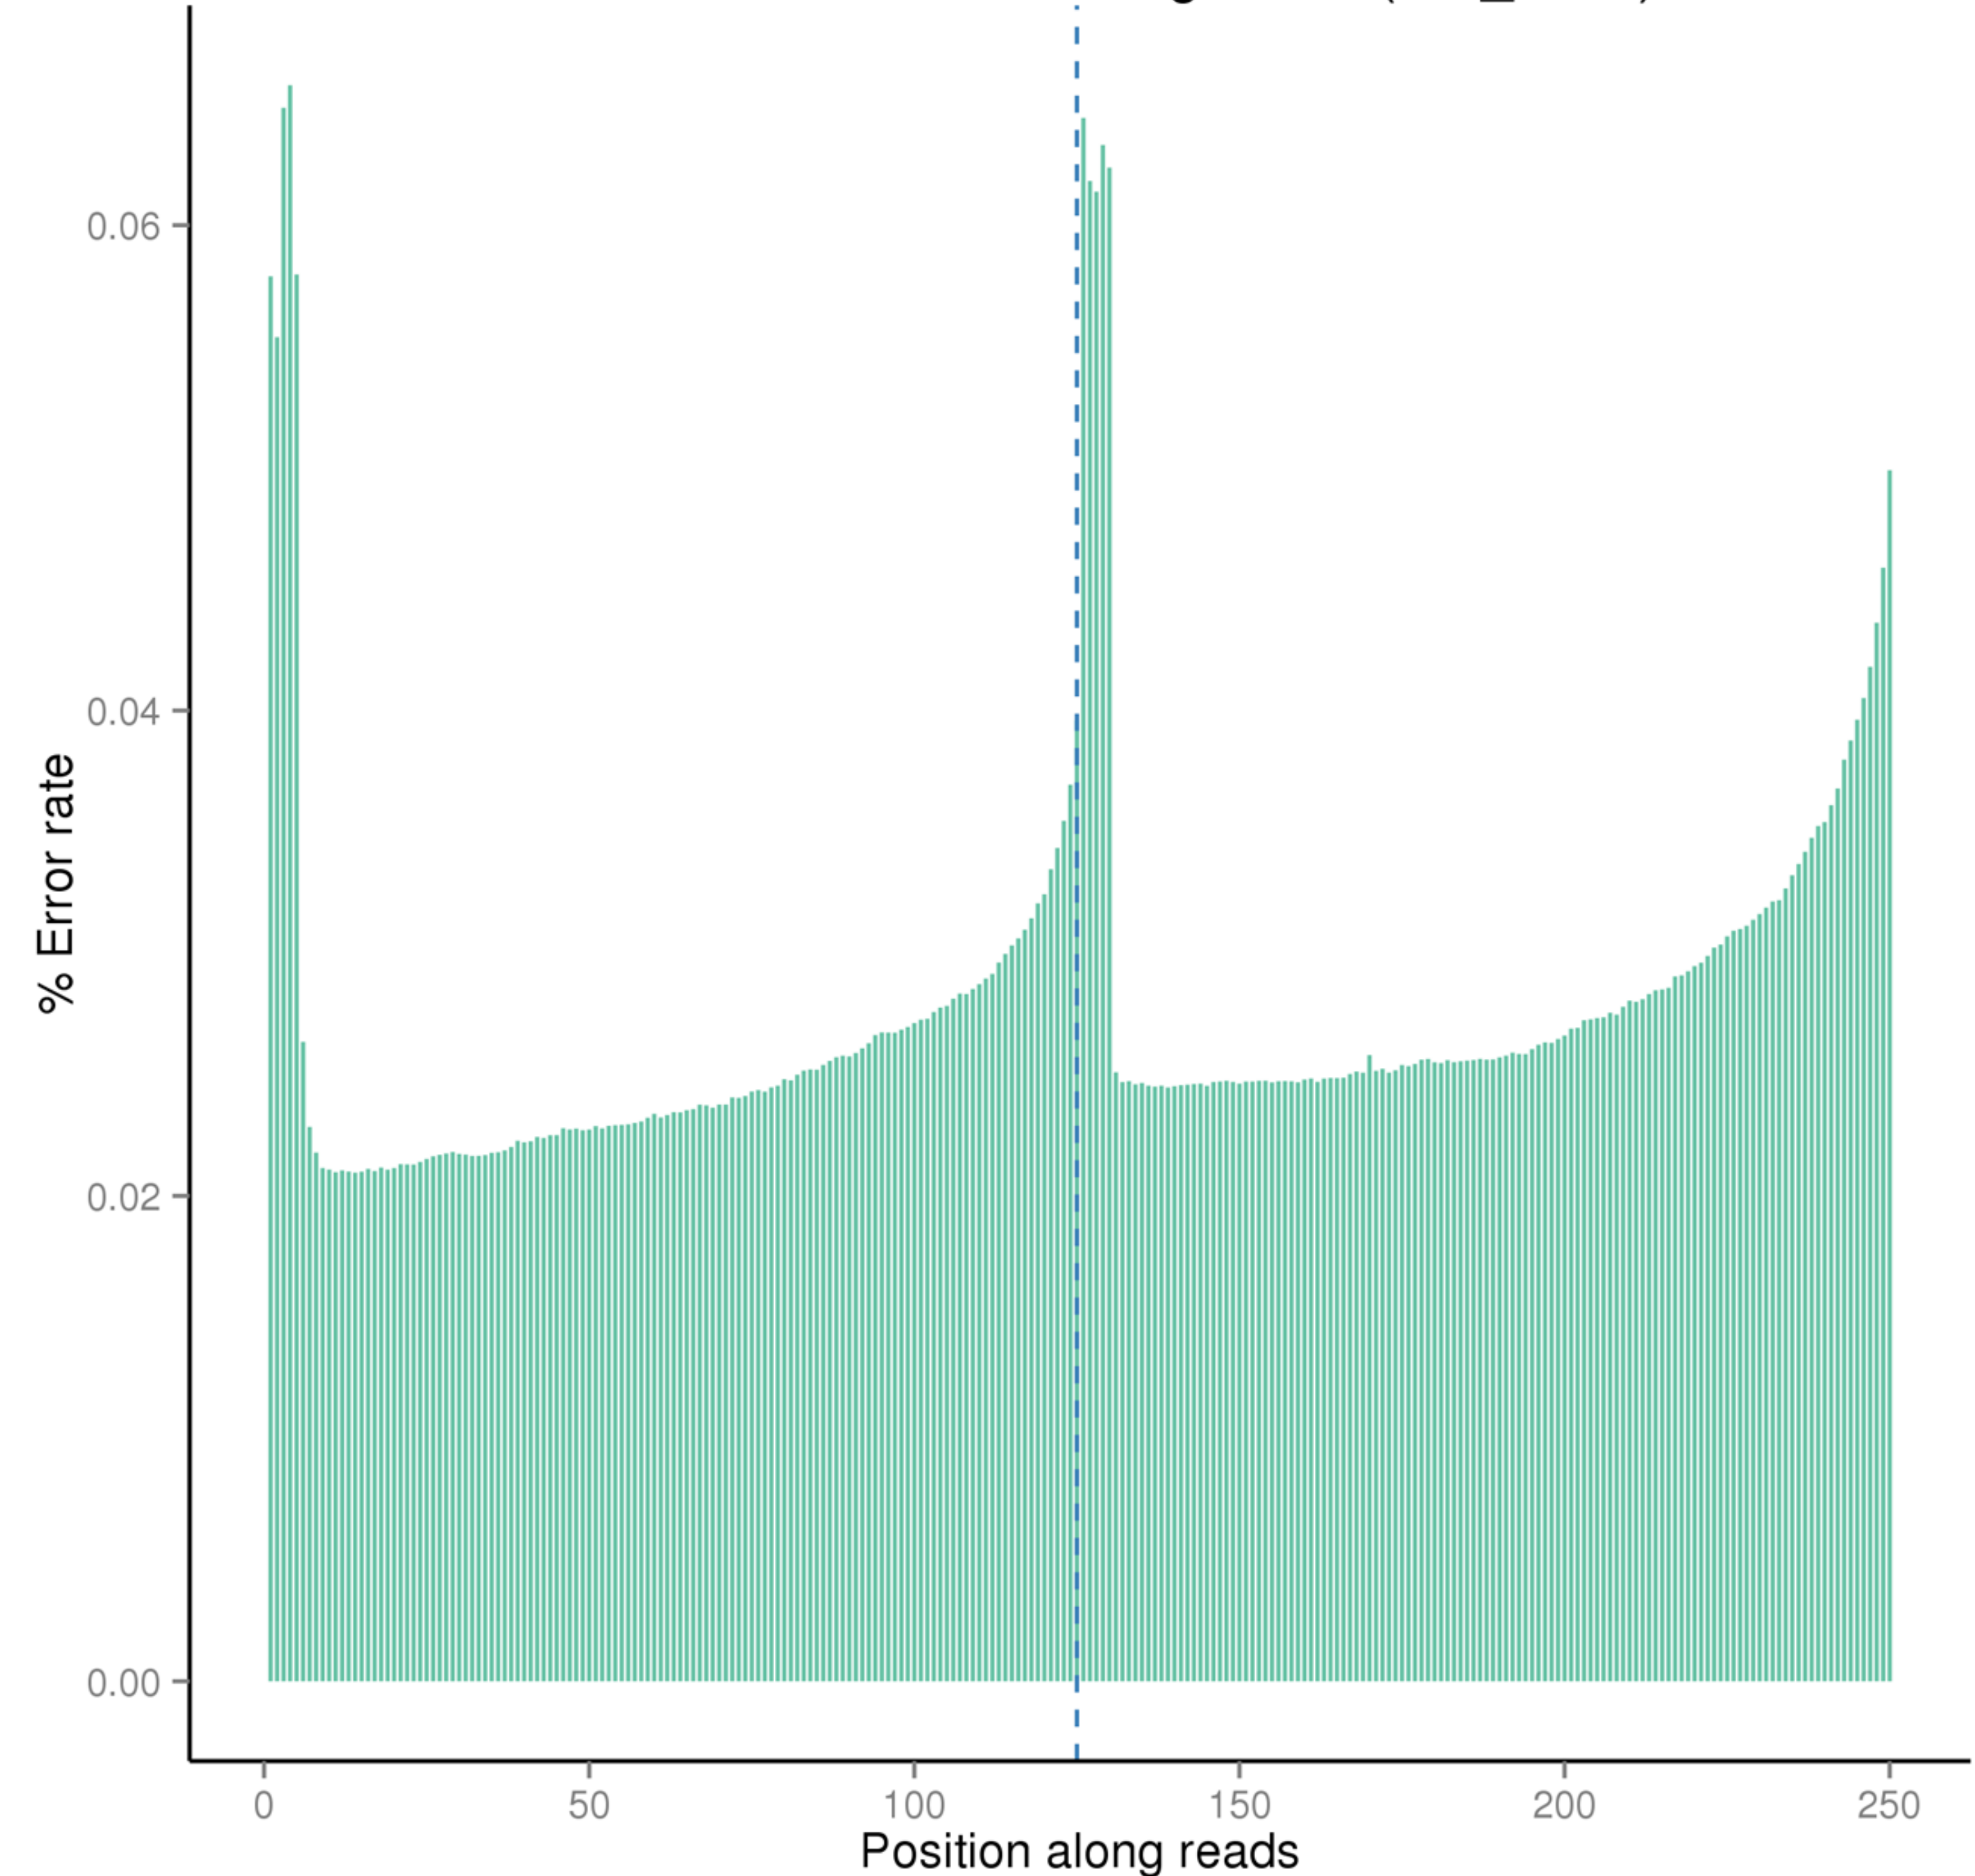

Error rate distribution along reads (PO\_con3)

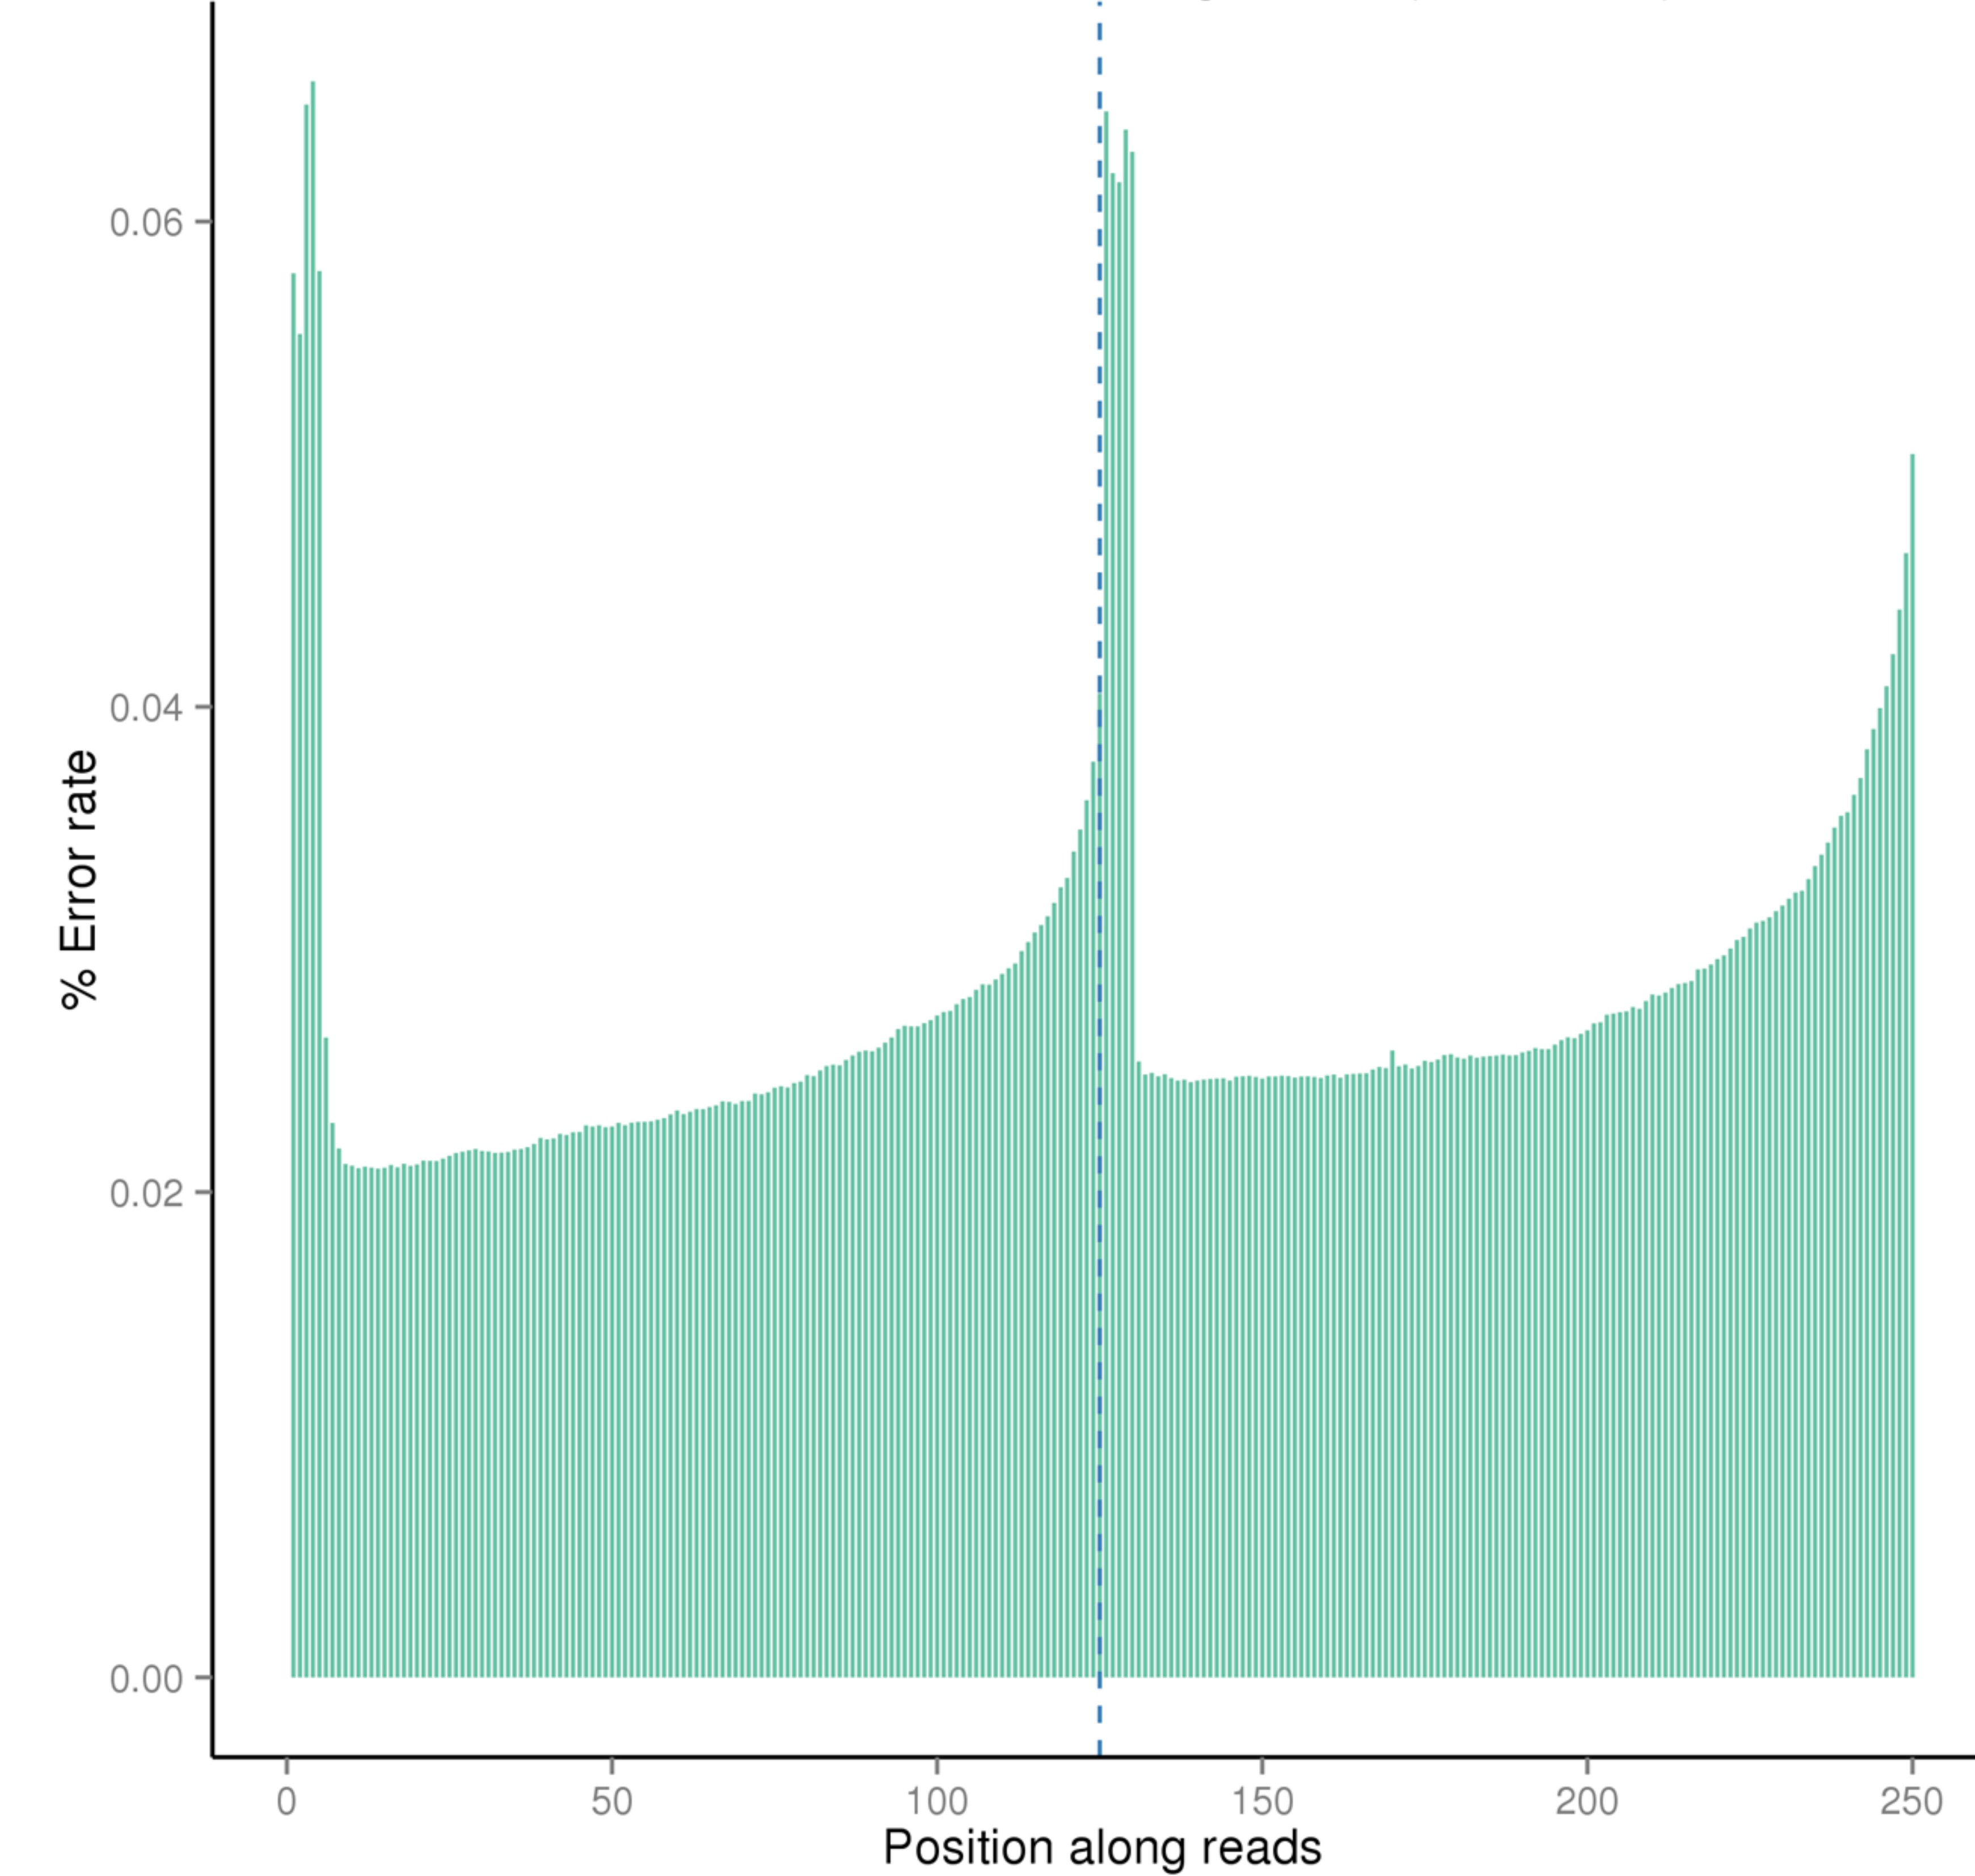

Error rate distribution along reads (PO\_alb1)

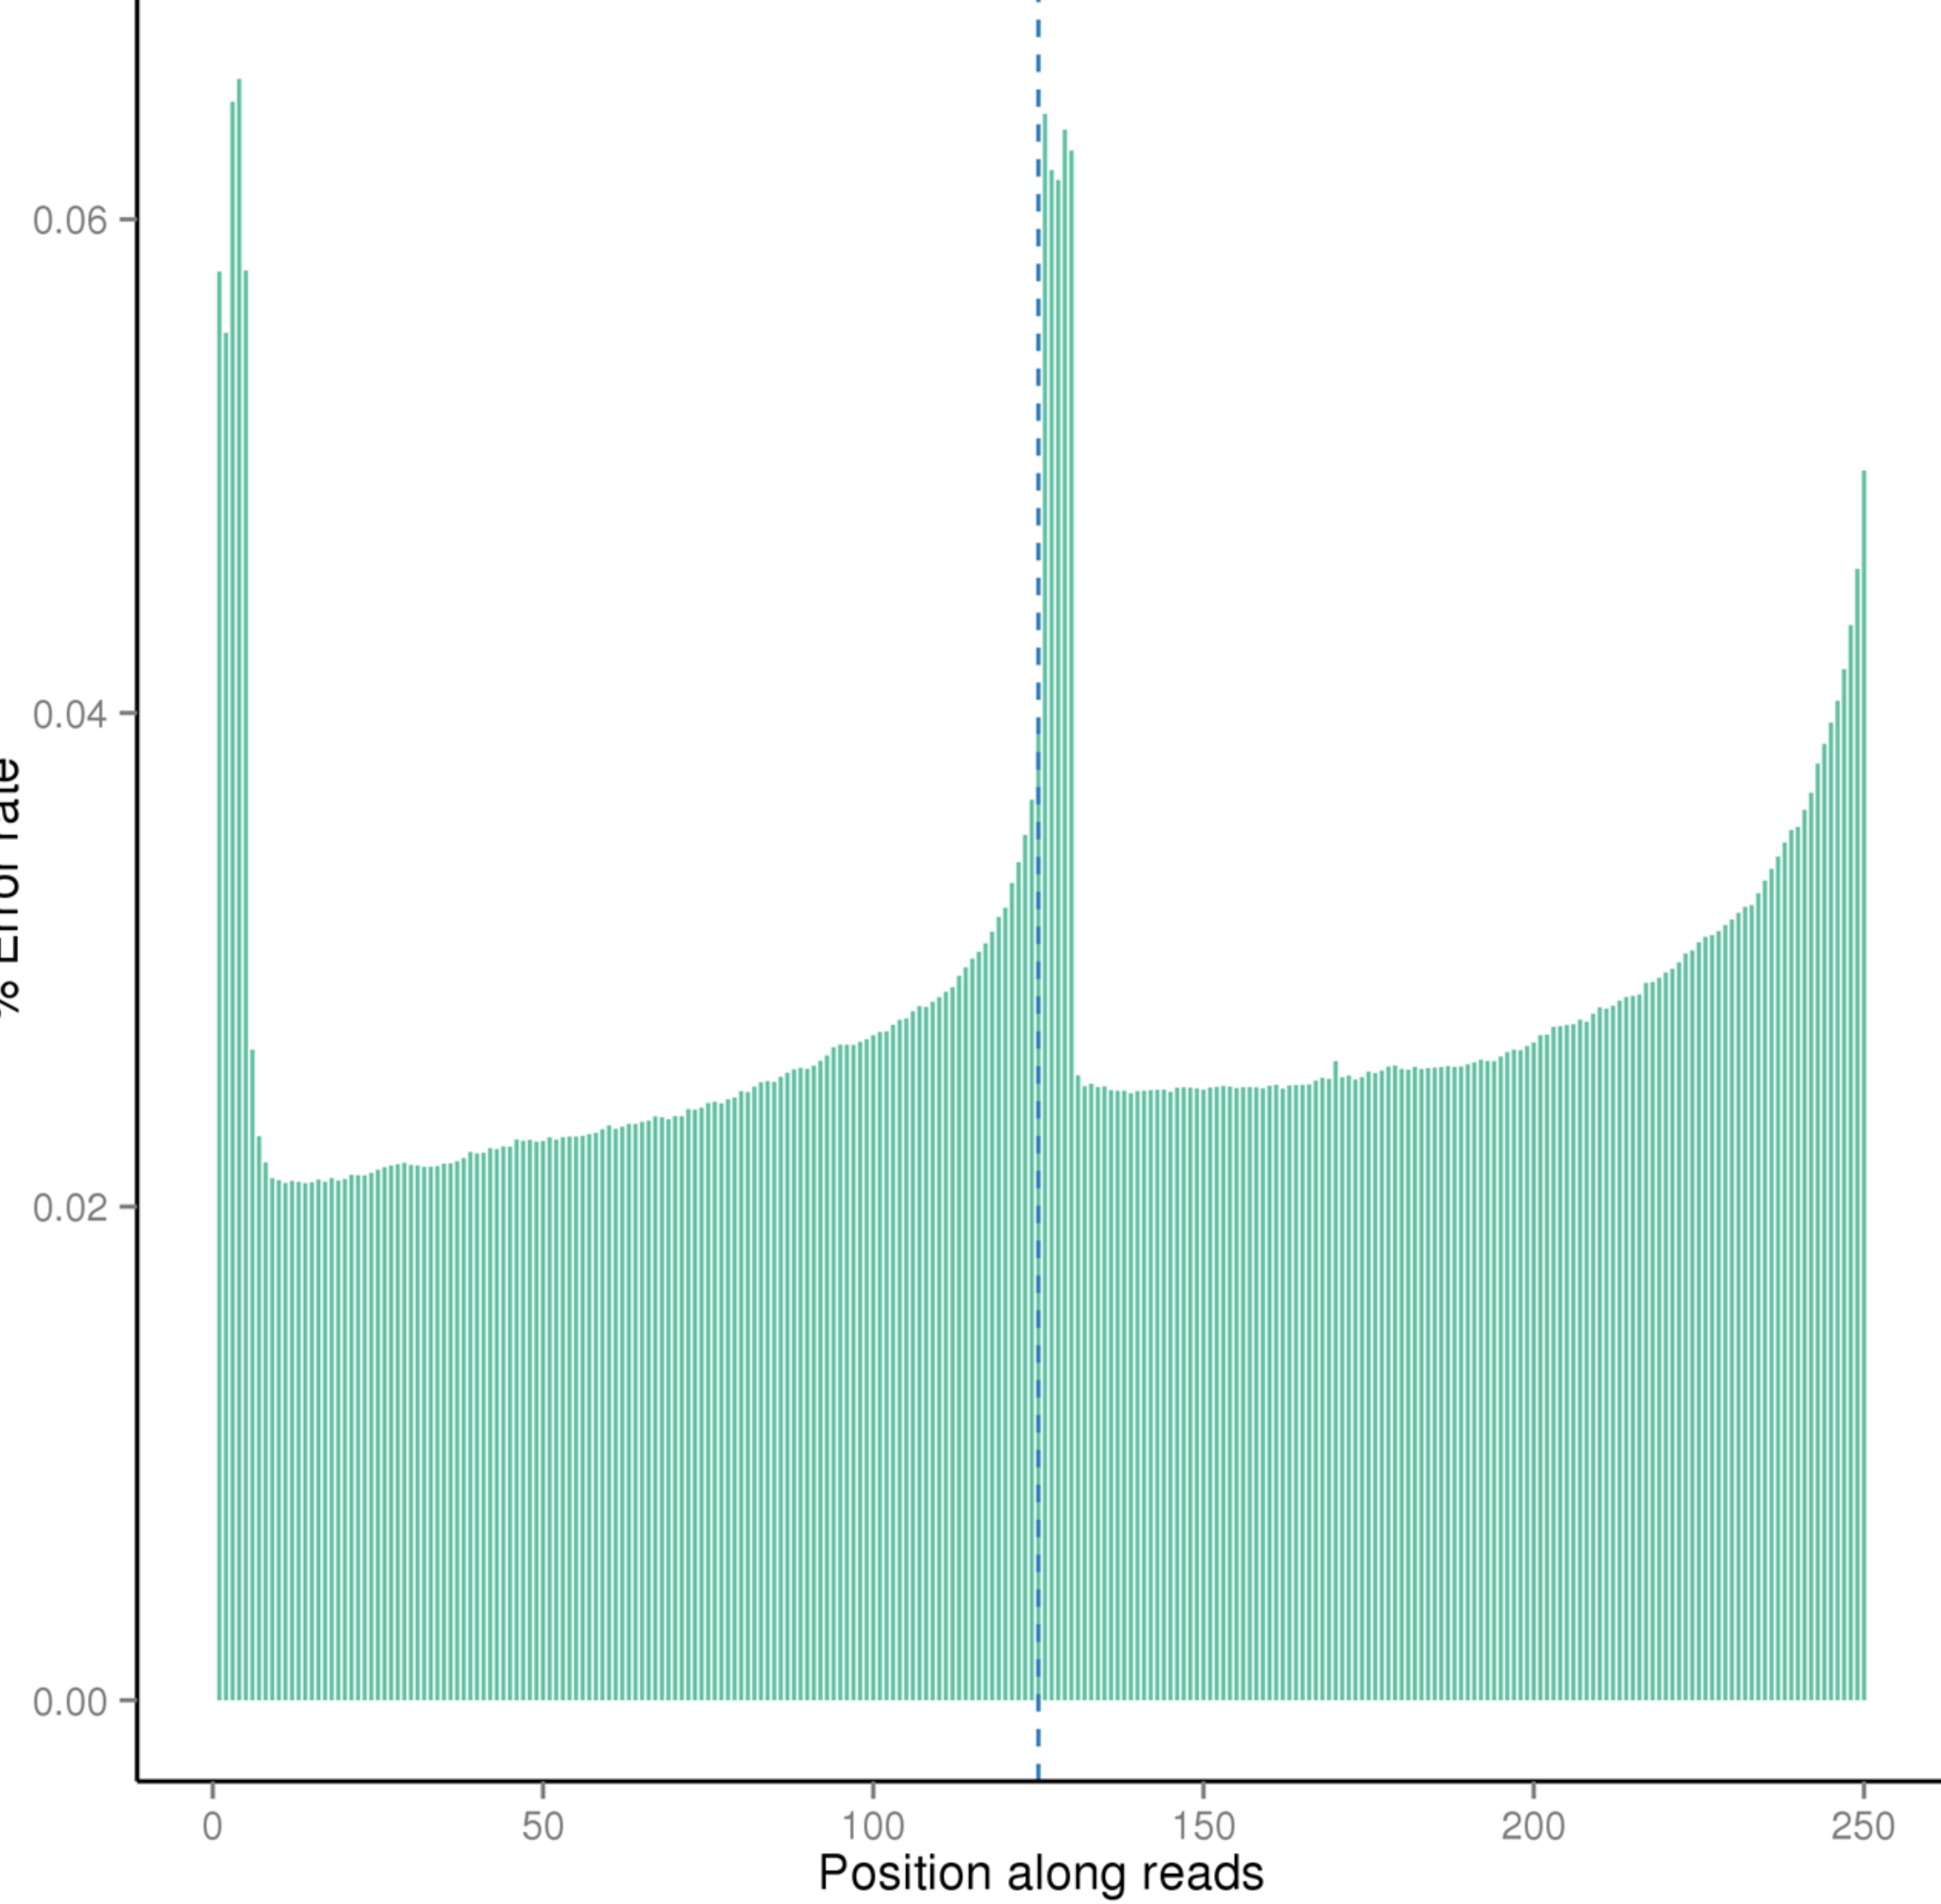

Error rate distribution along reads (PO\_alb2)

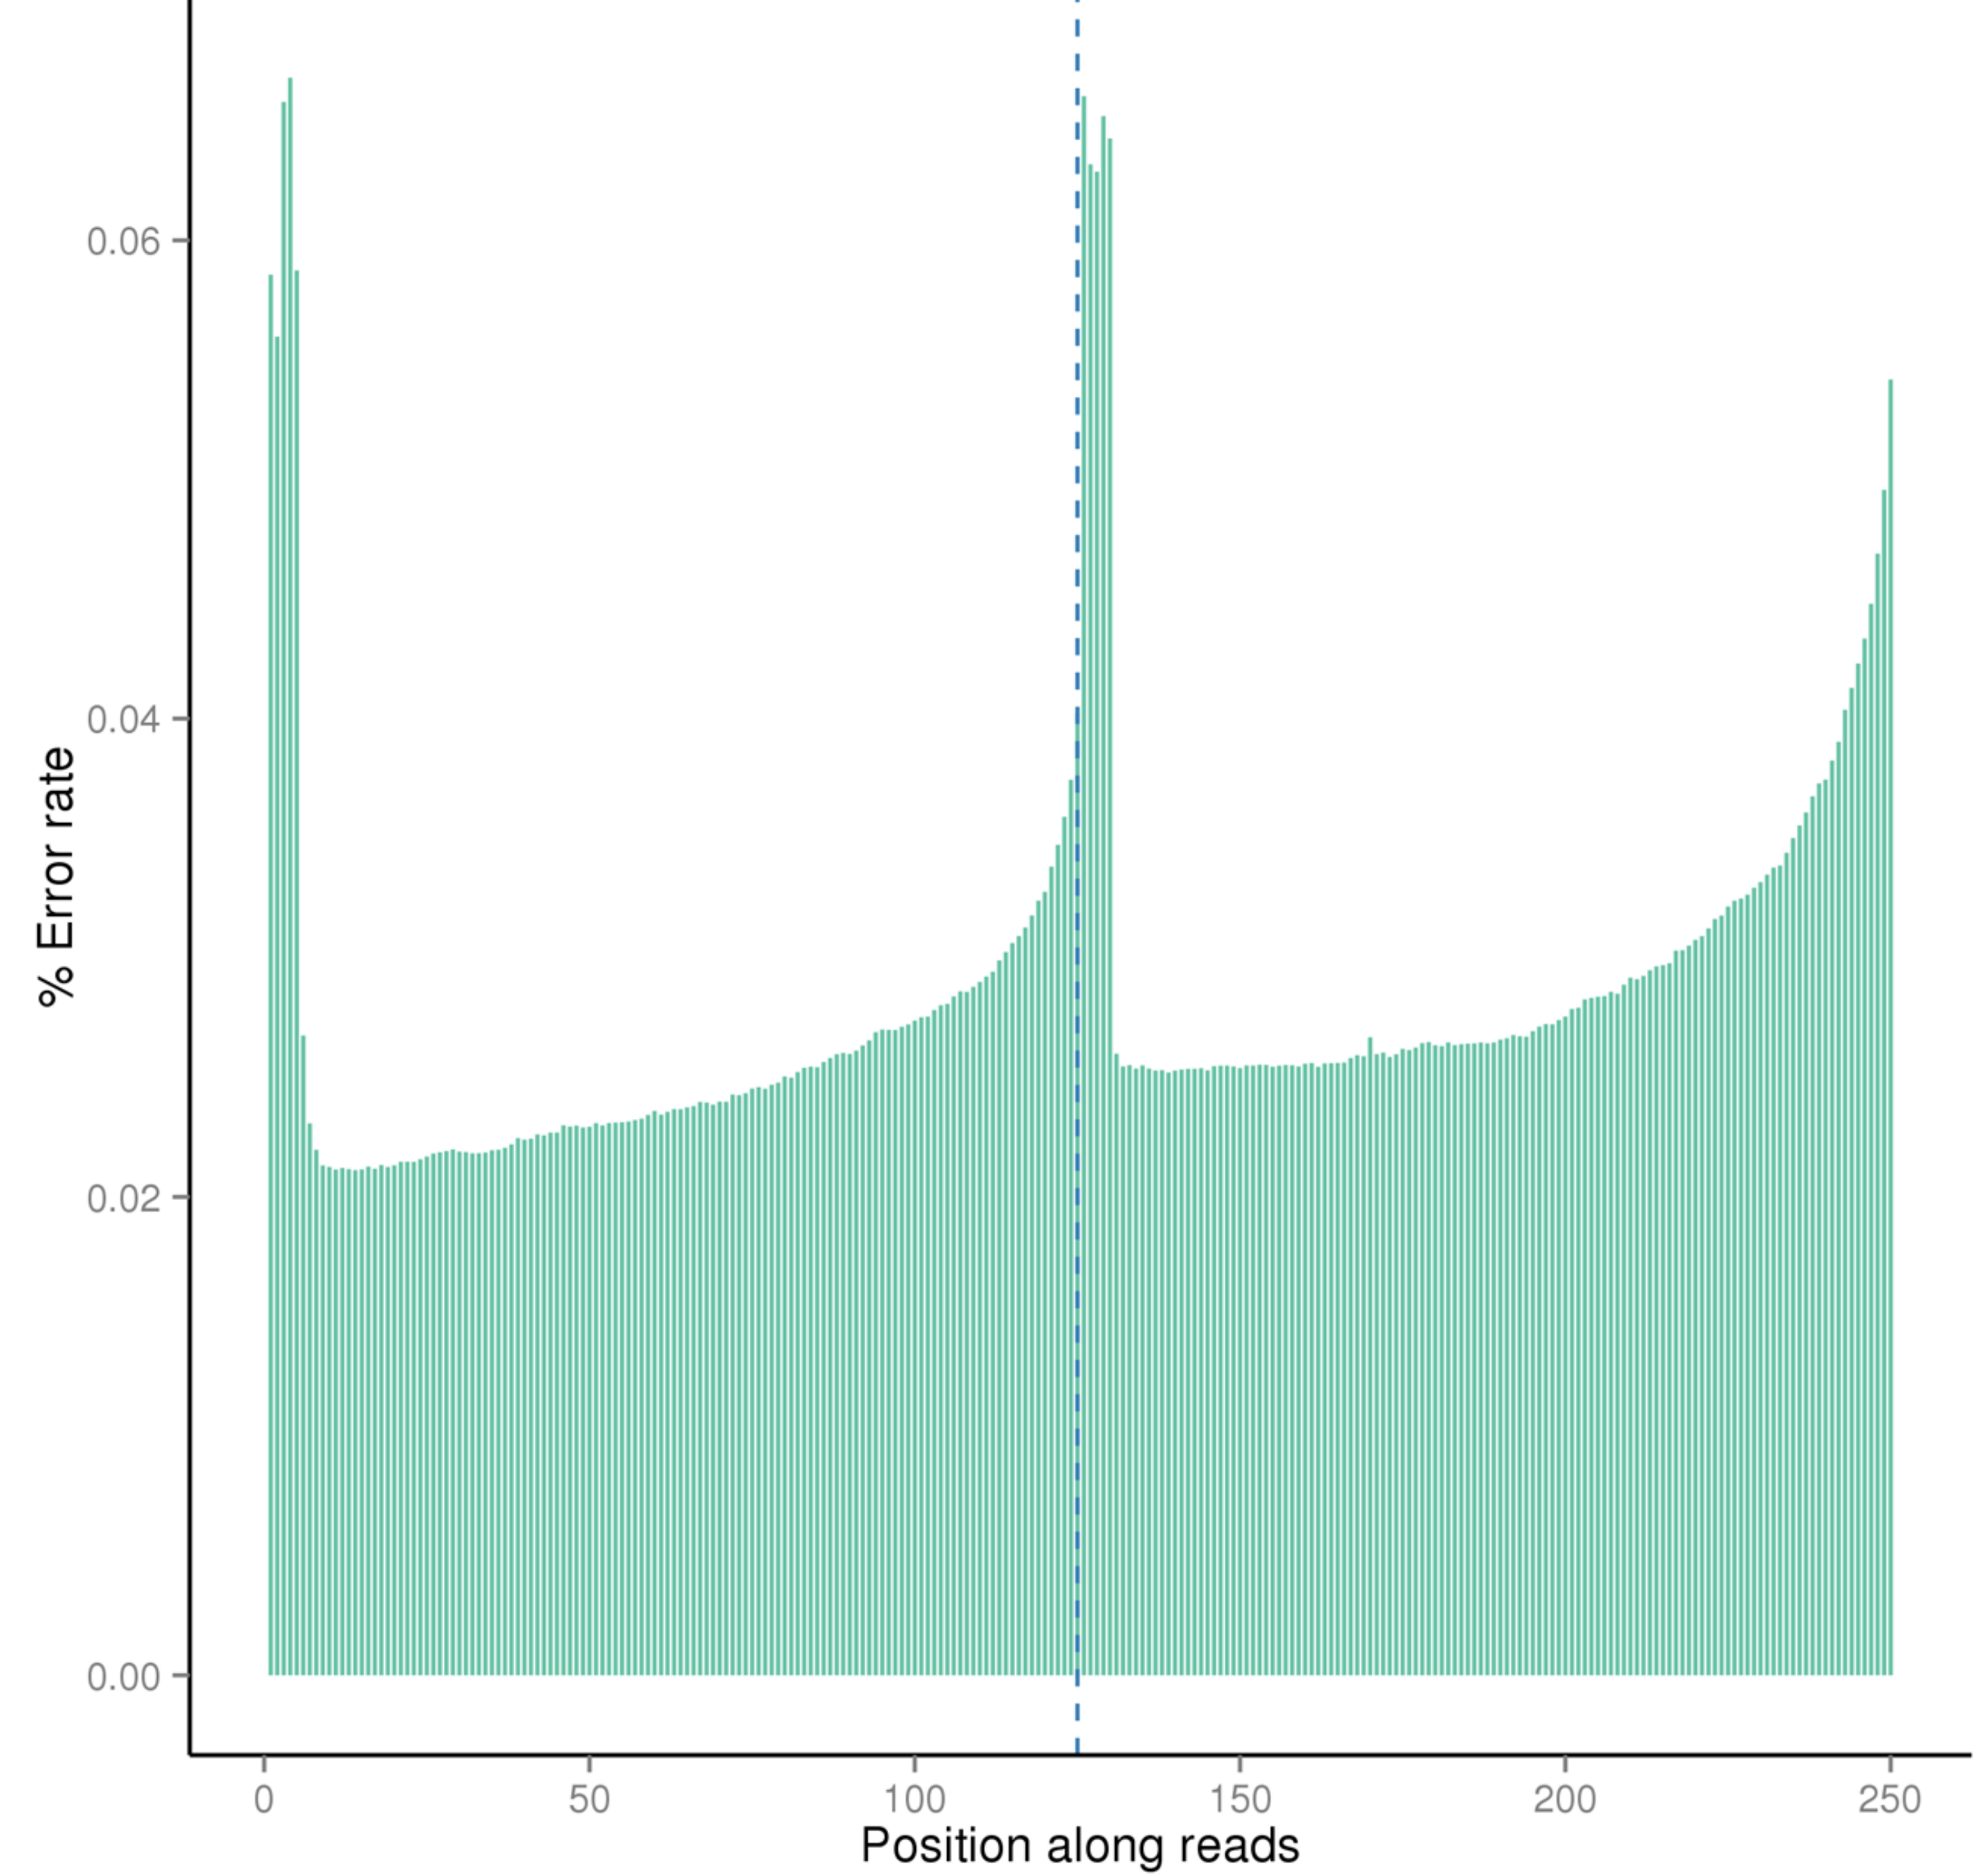

Error rate distribution along reads (PO\_alb3)

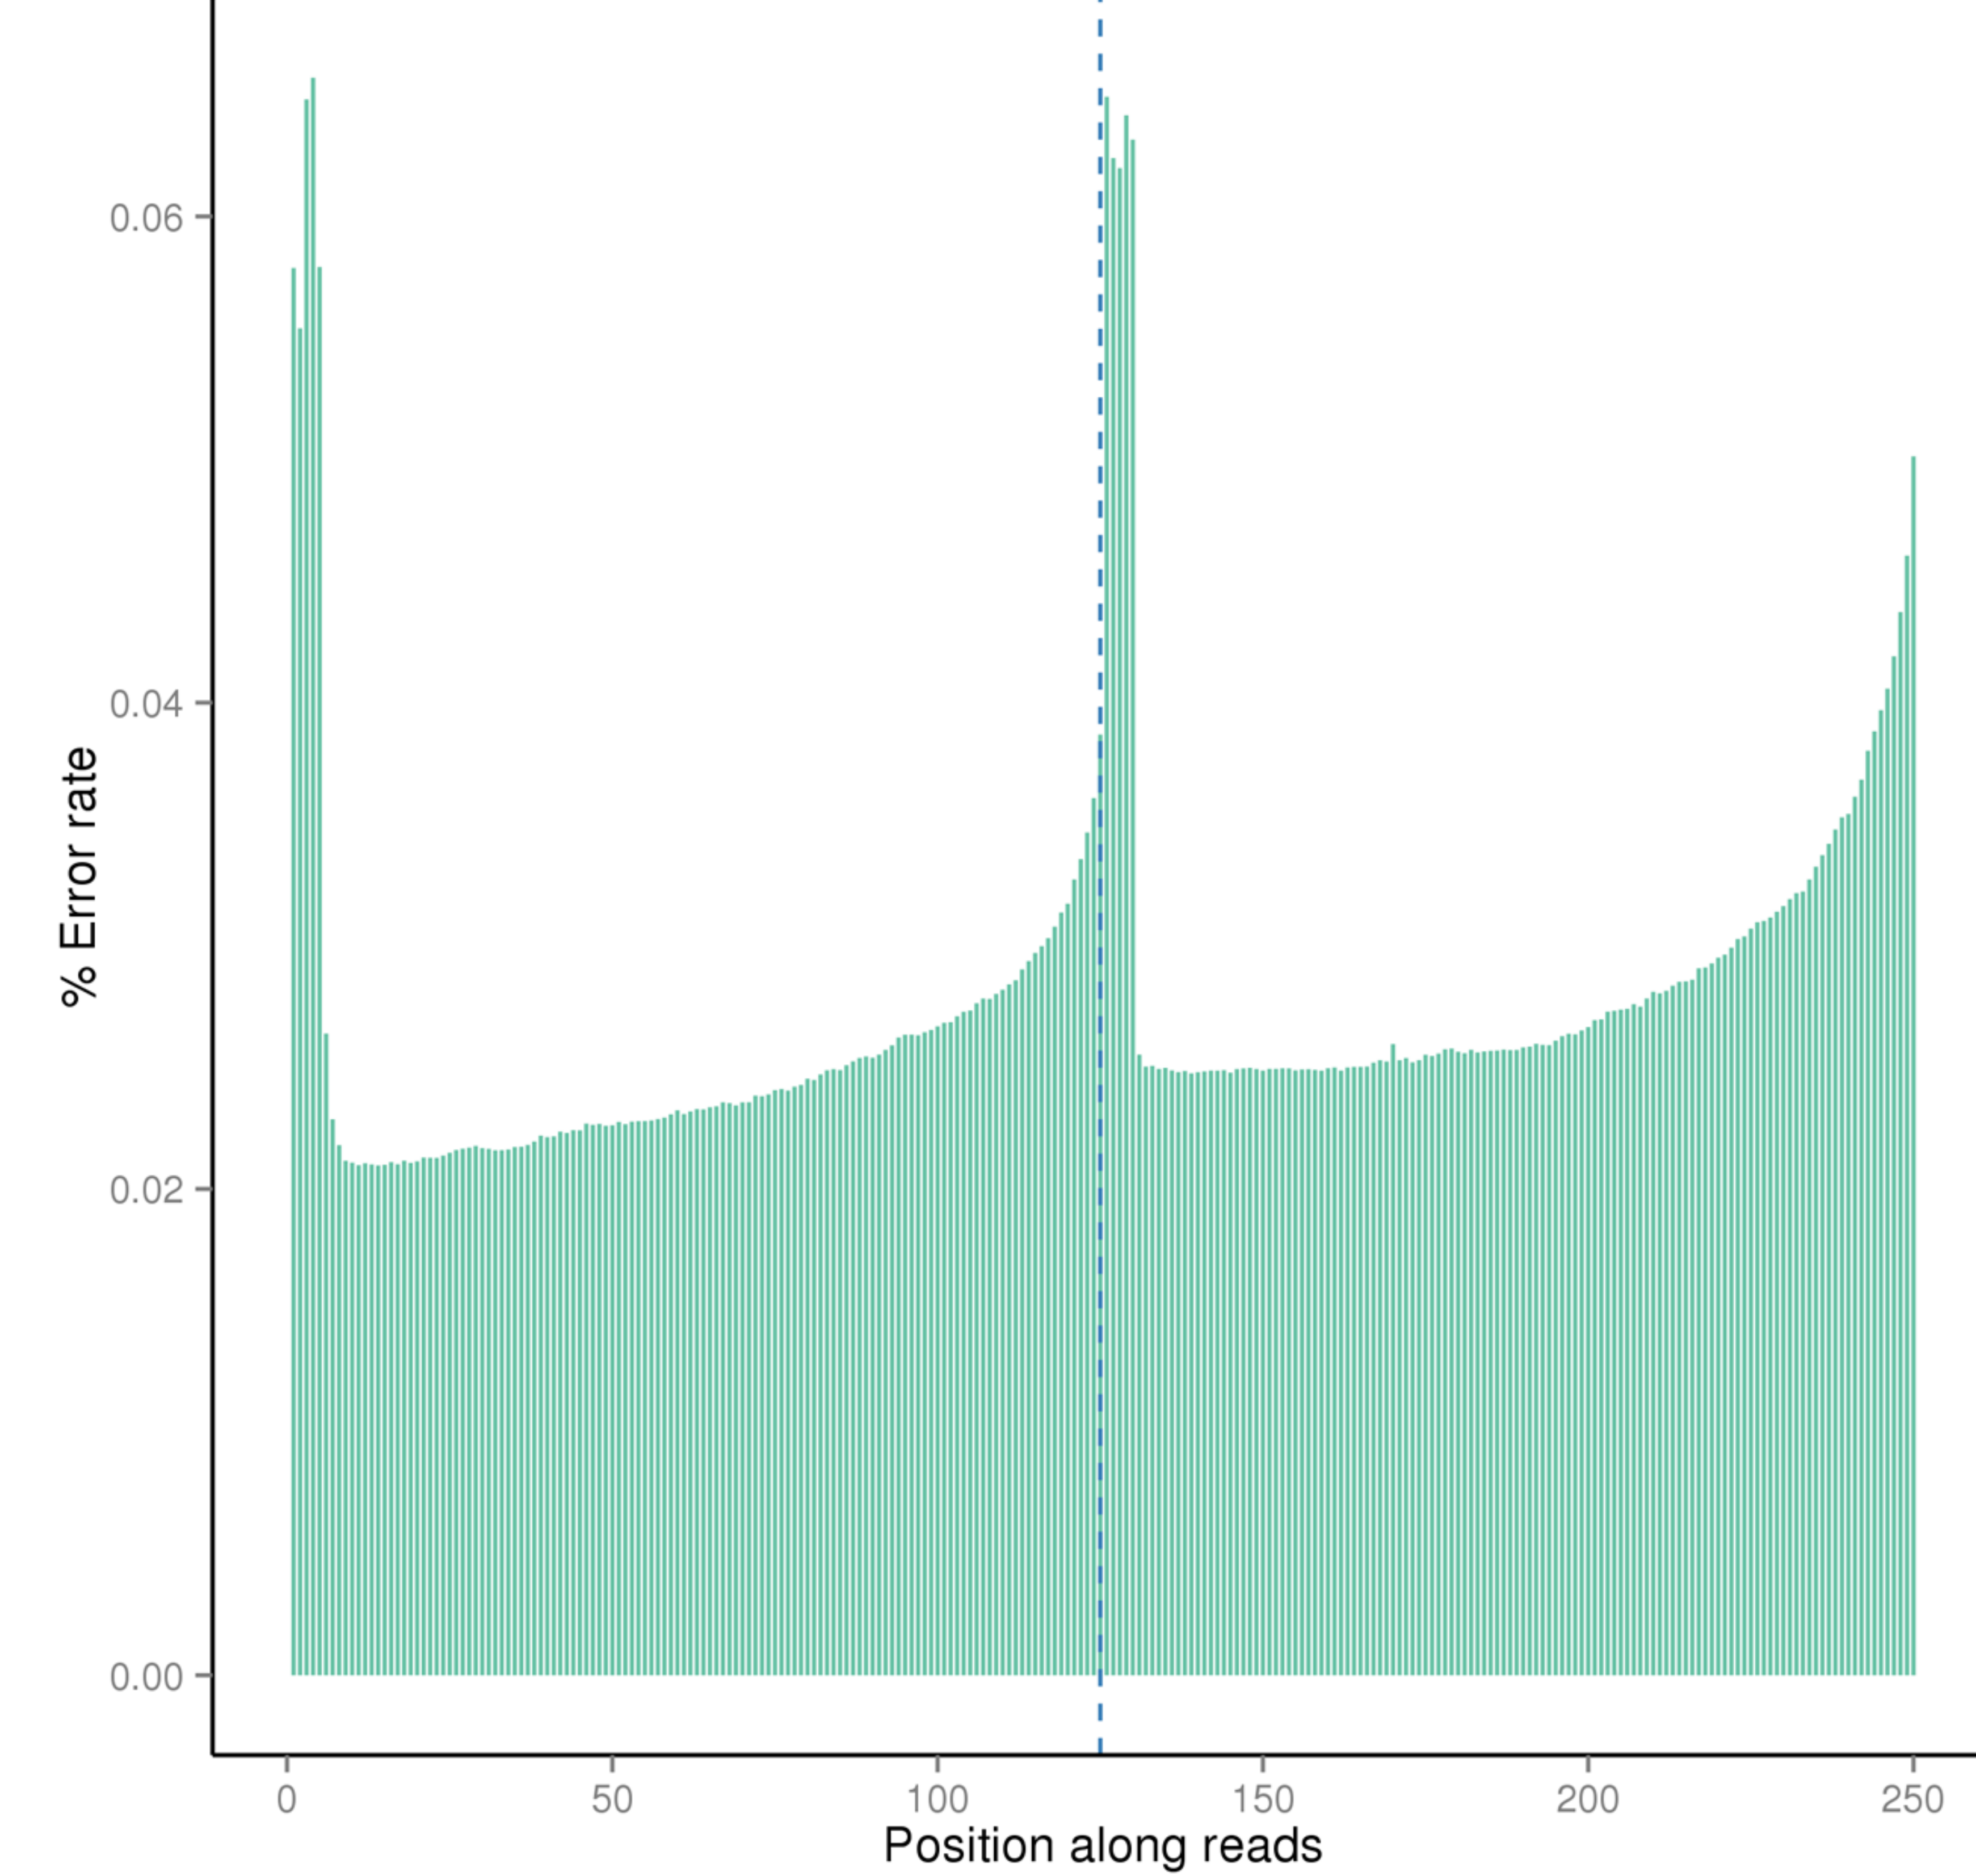

Supplement: pone.0181761.s001.pdf [file pone.0181761.s001.pdf]
