# Supplementary material for: The integrated analysis of RNA-seq and microRNA-seq depicts miRNA-mRNA networks involved in Japanese flounder (Paralichthys olivaceus) albinism
Source: PubMed Central journal article supplement (PMC5544202; doi:10.1371/journal.pone.0181761), 2017-08-04

S3 Fig. The FastQC analysis before and after trimming in six small RNA libraries.

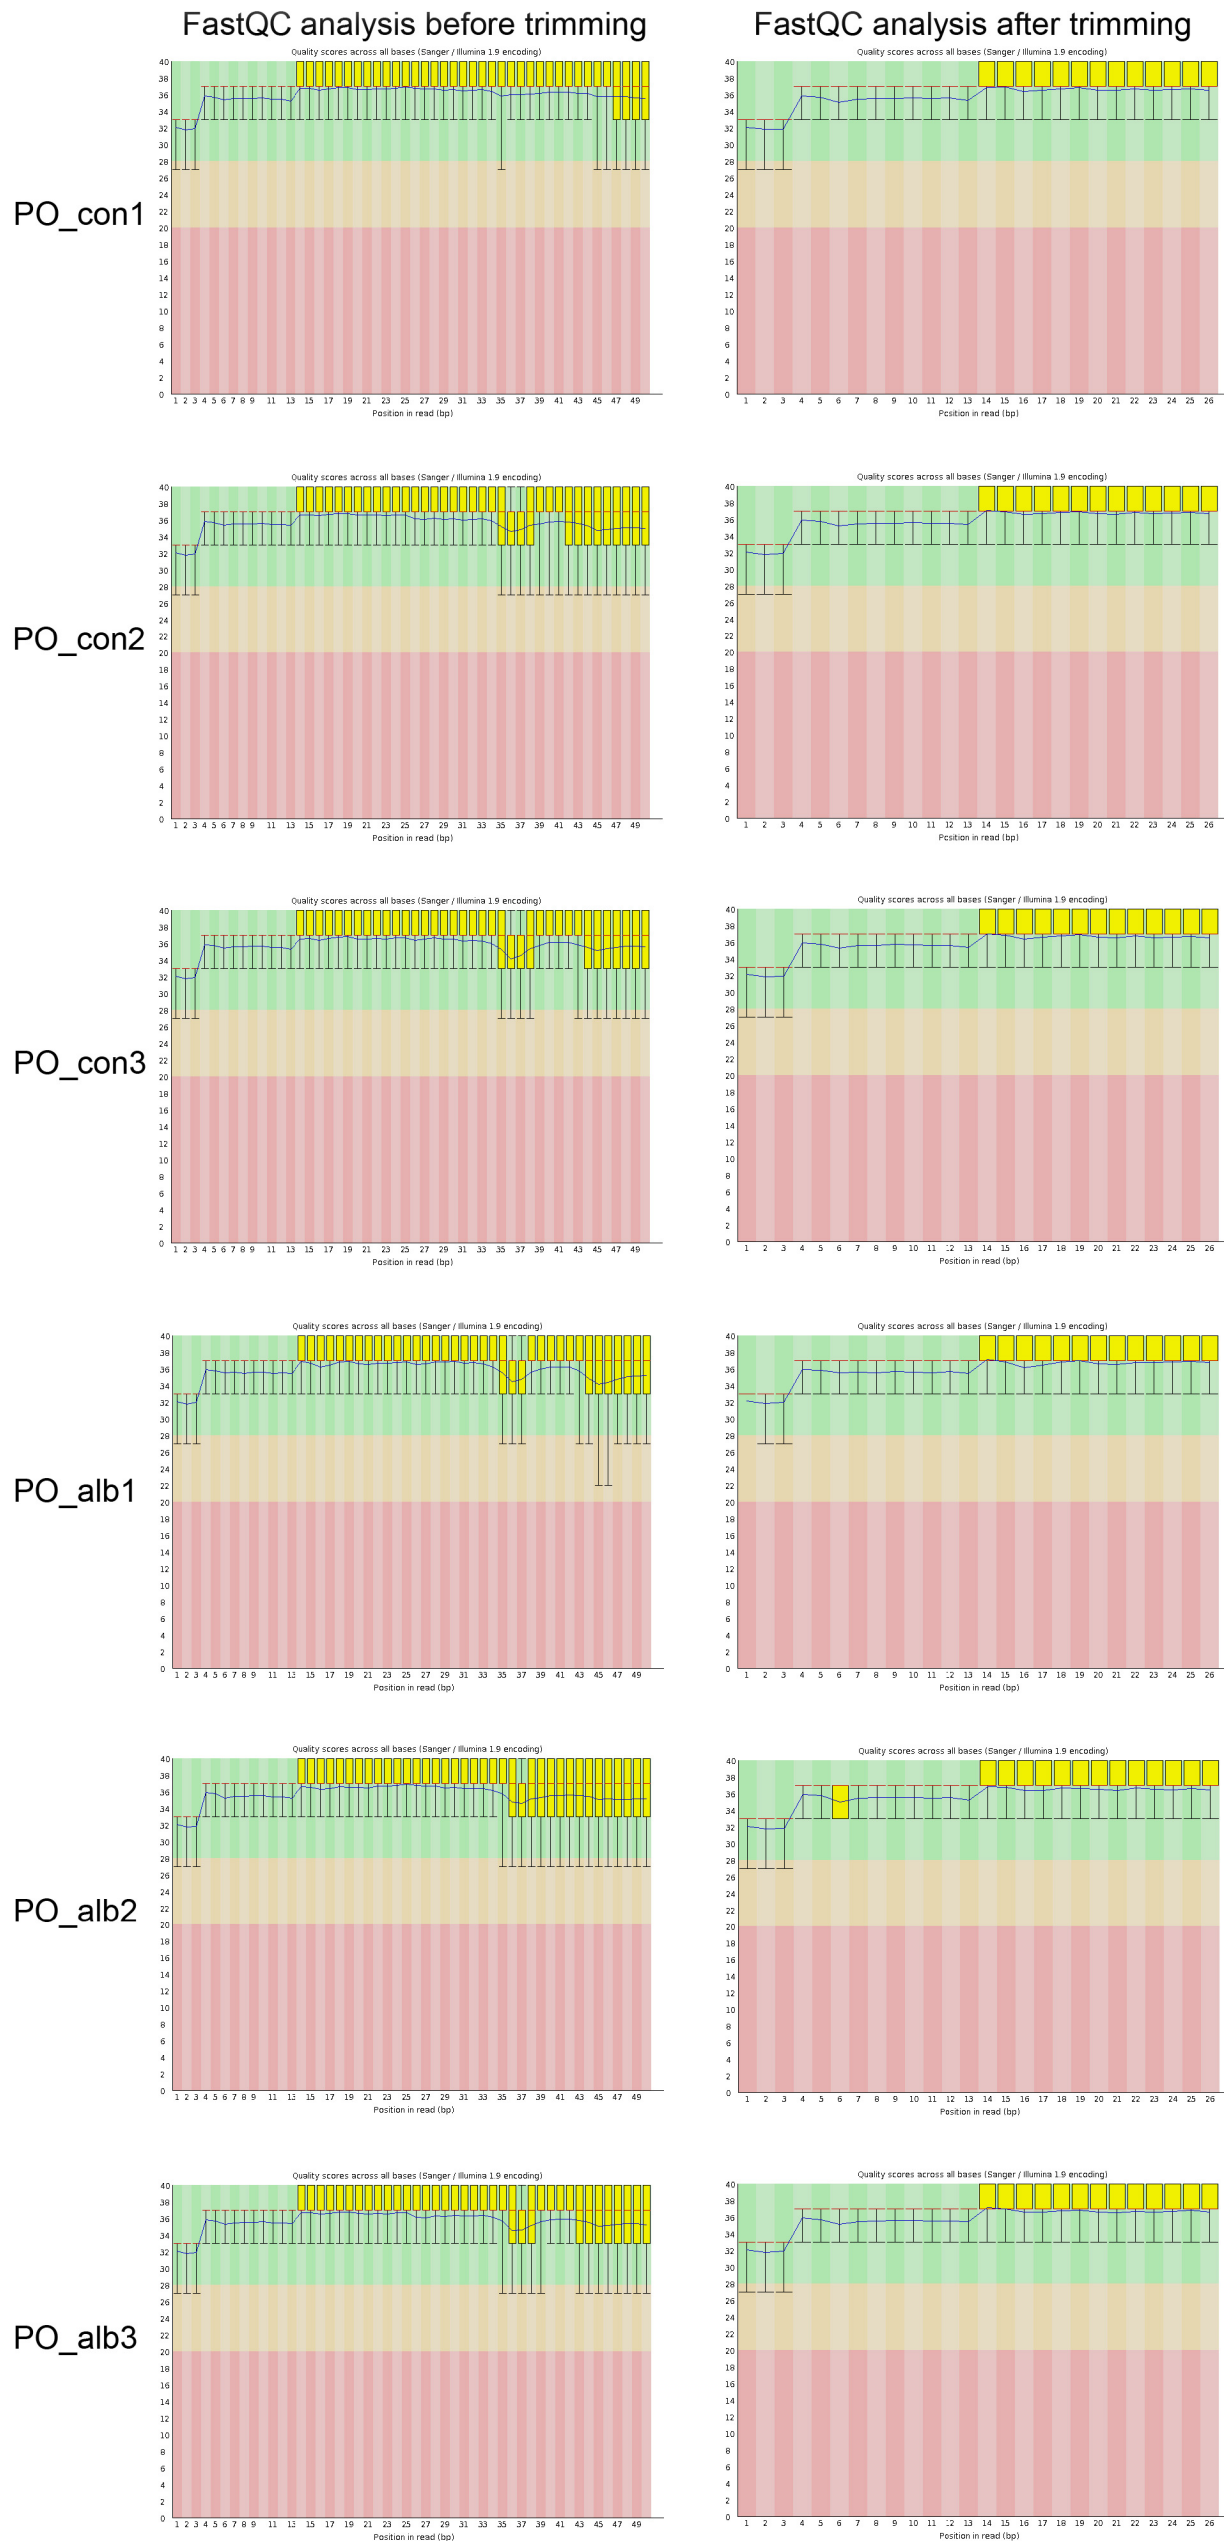

Supplement: pone.0181761.s003.pdf [file pone.0181761.s003.pdf]
