# Supplementary material for: The integrated analysis of RNA-seq and microRNA-seq depicts miRNA-mRNA networks involved in Japanese flounder (Paralichthys olivaceus) albinism
Source: PubMed Central journal article supplement (PMC5544202; doi:10.1371/journal.pone.0181761), 2017-08-04

# S4 Fig. The correlation analysis in six small RNA libraries.

PO\_con1vsPO\_con2,R=0.913756934209462

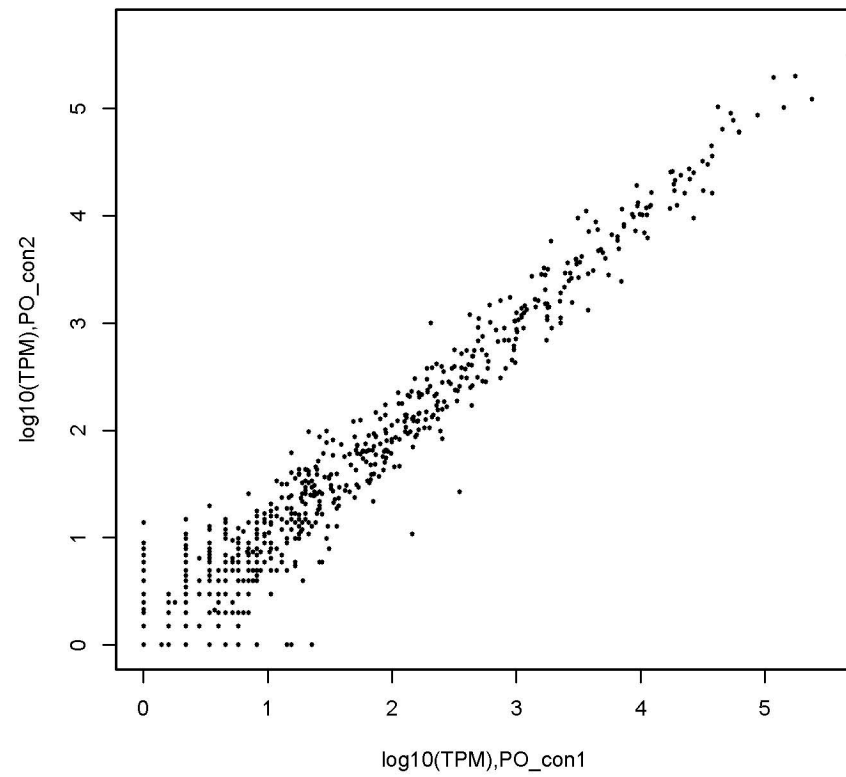

PO\_con1vsPO\_con3,R=0.97107208271658

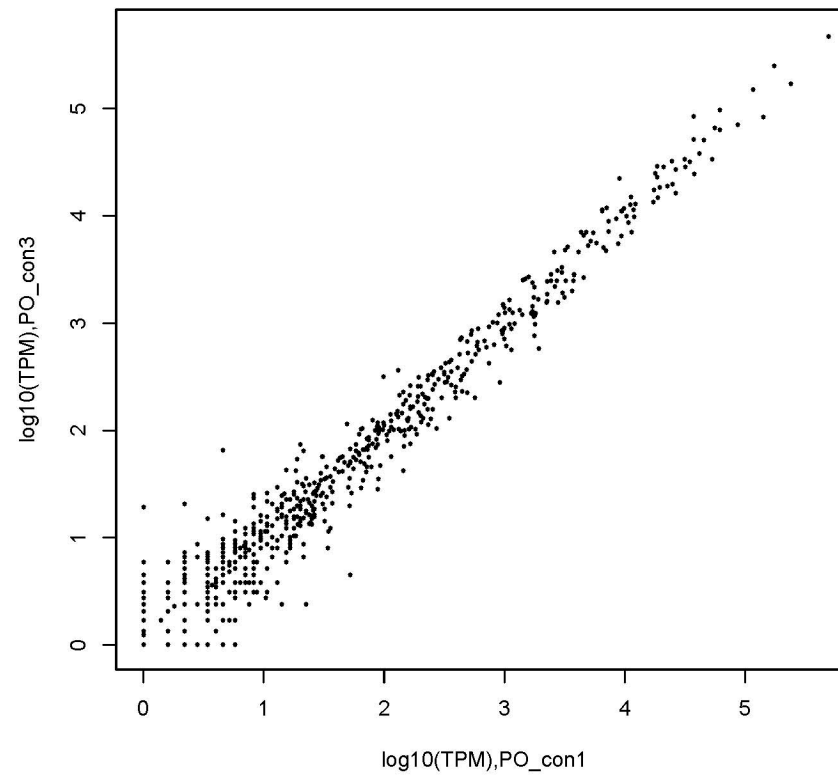

PO\_con2vsPO\_con3,R=0.948163394702557

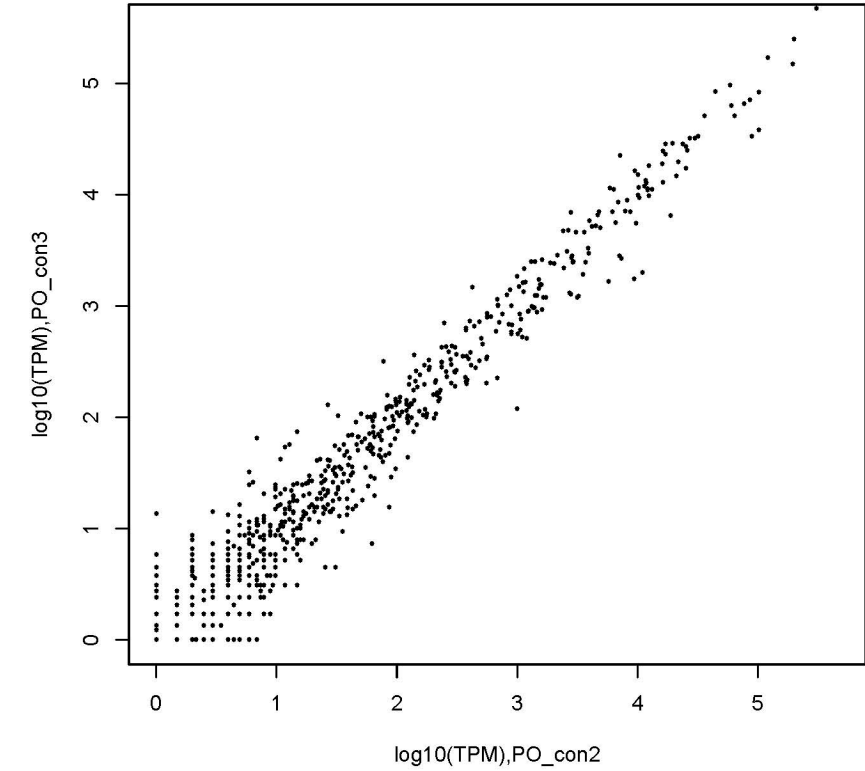

PO\_alb2vsPO\_alb3,R=0.89962672646609

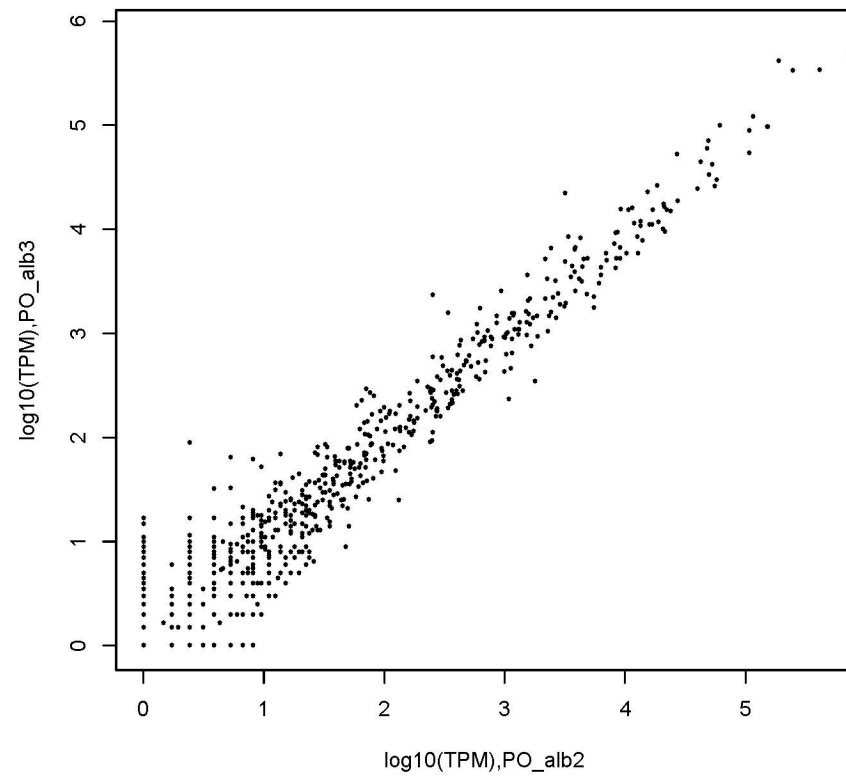

PO\_alb2vsPO\_alb1,R=0.645041740586478

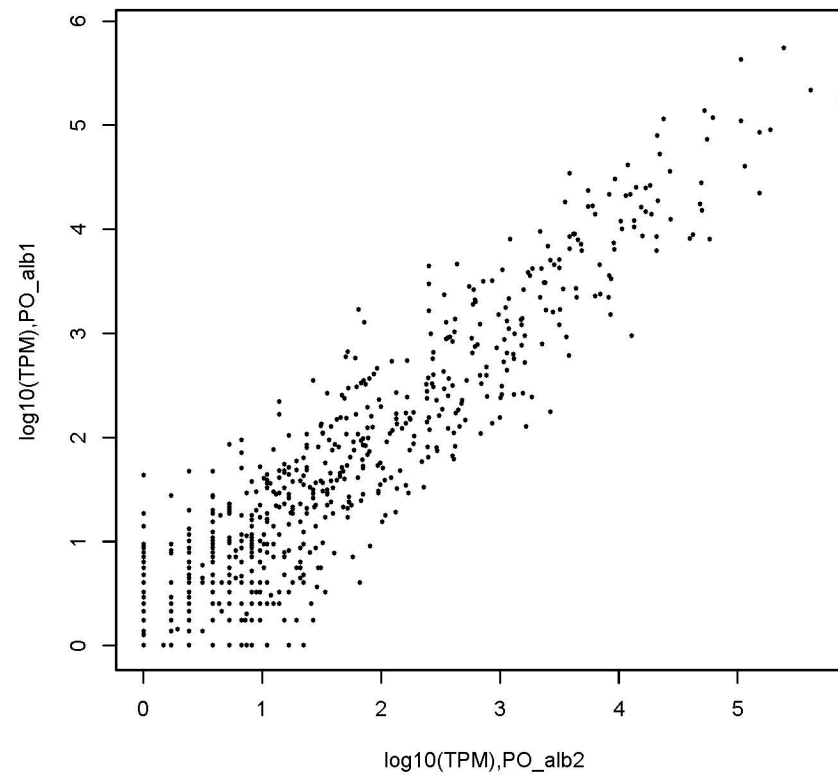

PO\_alb3vsPO\_alb1,R=0.668080611075564

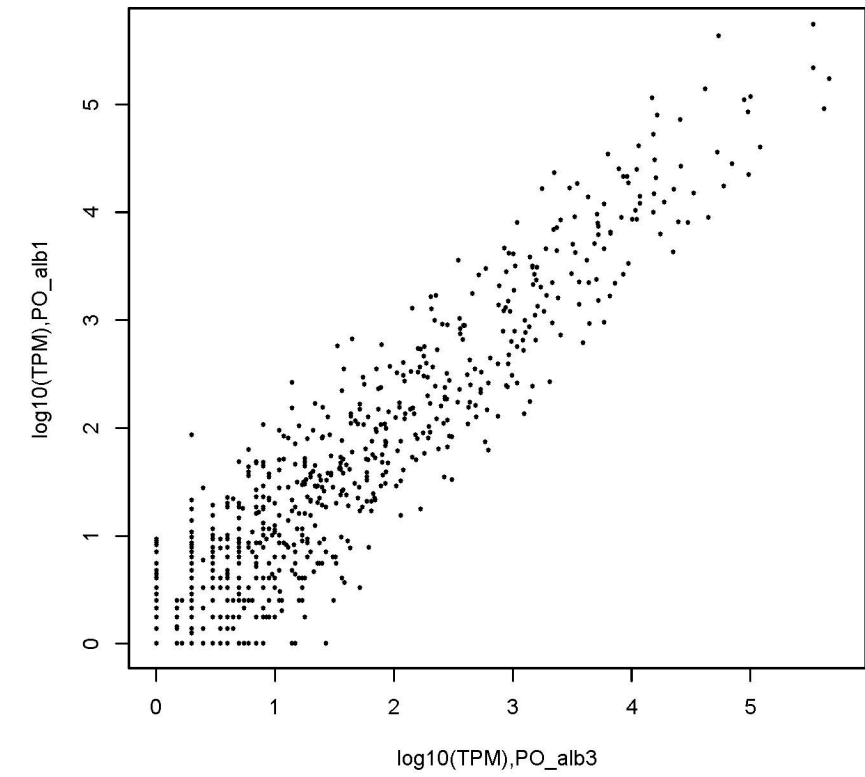

Supplement: pone.0181761.s004.pdf [file pone.0181761.s004.pdf]
