# Supplementary material for: The integrated analysis of RNA-seq and microRNA-seq depicts miRNA-mRNA networks involved in Japanese flounder (Paralichthys olivaceus) albinism
Source: PubMed Central journal article supplement (PMC5544202; doi:10.1371/journal.pone.0181761), 2017-08-04
Supplement: pone.0181761.s005.pdf [file pone.0181761.s005.pdf]

**S1 Table. Species priority from vertebrate subdivision mapped to miRBase 21.0.**

| Class          | Organism                         | Common Name               | 3 letter name |
|----------------|----------------------------------|---------------------------|---------------|
| Pisces         | <i>Paralichthys olivaceus</i>    | Olive flounder            | pol           |
| Pisces         | <i>Danio rerio</i>               | Zebrafish                 | dre           |
| Pisces         | <i>Ictalurus punctatus</i>       | channel catfish           | ipu           |
| Pisces         | <i>Oryzias latipes</i>           | Japanese killifish        | ola           |
| Pisces         | <i>Cyprinus carpio</i>           | Common carp               | ccr           |
| Pisces         | <i>Tetraodon nigroviridis</i>    | Tetraodon Pufferfish      | tni           |
| Pisces         | <i>Fugu rubripes</i>             | Fugu Pufferfish           | fru           |
| Pisces         | <i>Hippoglossus hippoglossus</i> | Atlantic halibut          | hhi           |
| Mammalia       | <i>Homo sapiens</i>              | Human                     | hsa           |
| Mammalia       | <i>Mus musculus</i>              | Mouse                     | mmu           |
| Mammalia       | <i>Bos taurus</i>                | Cow                       | bta           |
| Mammalia       | <i>Pongo pygmaeus</i>            | Orangutan                 | ppy           |
| Mammalia       | <i>Pan troglodytes</i>           | Common Chimpanzee         | ptr           |
| Mammalia       | <i>Macaca mulatta</i>            | Rhesus Monkey             | mml           |
| Mammalia       | <i>Monodelphis domestica</i>     | Gray Short-tailed Opossum | mdo           |
| Mammalia       | <i>Rattus norvegicus</i>         | Rat                       | rno           |
| Mammalia       | <i>Ornithorhynchus anatinus</i>  | Platypus                  | oan           |
| Mammalia       | <i>Equus caballus</i>            | Horse                     | eca           |
| Mammalia       | <i>Canis familiaris</i>          | Dog                       | cfa           |
| Mammalia       | <i>Gorilla gorilla</i>           | Gorilla                   | ggo           |
| Mammalia       | <i>Sus scrofa</i>                | Pig                       | ssc           |
| Mammalia       | <i>Cricetulus griseus</i>        | Chinese Hamster           | cgr           |
| Mammalia       | <i>Ovis aries</i>                | Sheep                     | oar           |
| Mammalia       | <i>Pan paniscus</i>              | Pygmy Chimpanzee          | ppa           |
| Mammalia       | <i>Macaca nemestrina</i>         | Pig-tailed macaque        | mne           |
| Mammalia       | <i>Sarcophilus harrisii</i>      | Tasmanian devil           | sha           |
| Mammalia       | <i>Ateles geoffroyi</i>          | Spider monkey             | age           |
| Mammalia       | <i>Lagothrix lagotricha</i>      | Woolly monkey             | lla           |
| Mammalia       | <i>Saguinus labiatus</i>         | White-lipped Tamarin      | sla           |
| Mammalia       | <i>Artibeus jamaicensis</i>      | Mexican fruit bat         | aja           |
| Mammalia       | <i>Lemur catta</i>               | Ring-tailed Lemur         | lca           |
| Mammalia       | <i>Pygathrix bieti</i>           | Black snub-nosed monkey   | pbi           |
| Mammalia       | <i>Symphalangus syndactylus</i>  | Siamang                   | ssy           |
| Mammalia       | <i>Macropus eugenii</i>          | Tammar wallaby            | meu           |
| Aves           | <i>Gallus gallus</i>             | Chicken                   | gga           |
| Aves           | <i>Taeniopygia guttata</i>       | Zebra Finch               | tgu           |
| Amphibia       | <i>Xenopus tropicalis</i>        | Pipid Frog                | xtr           |
| Amphibia       | <i>Xenopus laevis</i>            | Frog                      | xla           |
| Agnathostomata | <i>Petromyzon marinus</i>        | Petromyzon marinus        | pma           |
|                | <i>Anolis carolinensis</i>       | Carolina anole            | aca           |
