# Supplementary material for: The integrated analysis of RNA-seq and microRNA-seq depicts miRNA-mRNA networks involved in Japanese flounder (Paralichthys olivaceus) albinism
Source: PubMed Central journal article supplement (PMC5544202; doi:10.1371/journal.pone.0181761), 2017-08-04
Supplement: pone.0181761.s006.pdf [file pone.0181761.s006.pdf]

**S2 Table. Primers used for qRT-PCR of genes.**

| primers      | sequences (5'-3')           |
|--------------|-----------------------------|
| fabp2-F      | CCGCTCACGACAACCTCAAGAT      |
| fabp2-R      | ATCTGCAAGGCTGTAAGTCTCGAATGT |
| glrk-F       | CTGGTGGCTGTTTGTCTCTAATGC    |
| glrk-R       | TCCTGGTTGGCGAGGTCTTCA       |
| hspa8-F      | ACAAGAACCAGACAGCAGAGAAGG    |
| hsp8-R       | AACCACCAGGCATCCCACCA        |
| gch1-F       | ATGCGAGGCGTCCAGAAGATG       |
| gch1-R       | TGCTGTGAAAGGGTCAAGAACTCT    |
| novel00096-F | GCTGCTACTGAGGCTAAGAGACG     |
| novle00096-R | GGAACCTGTGCTGATGTCATTGTG    |
| pmel-F       | GCGAGTGCCAGAGTCAGTGTA       |
| pmel-R       | CAACAGACGACACAGGCGAGAA      |
| tmem130-F    | TTCCTTCATCGCAGTCATCGC       |
| tmem130-R    | GAATCGCACTCTGGTCGTCTGA      |
| tyr-F        | GAGTTCCTGACGCCATACCTCG      |
| tyr-R        | CCACTTCCTCCTCGCAACAACA      |
| tyrp1-F      | ACAACCTGGCACATCTCTTCCT      |
| tyrp1-R      | ACTCTGTCTCCTCAACCATTTCATCA  |
| wnt7b-F      | GCGGTTCAAGTGGAGCCTGT        |
| wnt7b-R      | CGTGTCCCTCCTCGCAGTAGTTG     |
