# Supplementary material for: The integrated analysis of RNA-seq and microRNA-seq depicts miRNA-mRNA networks involved in Japanese flounder (Paralichthys olivaceus) albinism
Source: PubMed Central journal article supplement (PMC5544202; doi:10.1371/journal.pone.0181761), 2017-08-04
Supplement: pone.0181761.s007.pdf [file pone.0181761.s007.pdf]

**S3 Table. Primers used for qRT-PCR of microRNAs.**

| miRNAs                     | primer sequences (5'-3')  |
|----------------------------|---------------------------|
| tmi-miR-16_R-1             | GGCTAGCAGCACGTAAATATTGGA  |
| hhi-miR-26_R+1             | GGCTTCAAGTAATCCAGGATAGGCT |
| ola-miR-16                 | GGCTAGCAGCACGTAAATATTGGC  |
| dre-miR-18b-5p_1ss11TC     | GCCTAAGGTGCATCTAGTGCAGATA |
| ola-miR-106a_R+2           | GCTAAAGTGCTTACAGTGCAGGTAG |
| dre-miR-26a-5p_R-1_1ss21CT | CGCGTTCAAGTAATCCAGGATAGGT |
| dre-miR-204-5p_L+1         | CCTTTCCTTTGTCATCCTATGCCT  |
| pol-miR-199a-5p_R+1        | CCCCAGTGTTCCAGACTACCTGTTC |
| mmu-miR-143-5p_R+2         | GCAGTGCTGCATCTCTGGTC      |
| PC-5p-59593_11             | GGACCCGTAGATCCGAACCTTGT   |
| 5s rRNA                    | GCTTACGGCCATACCACCT       |
