# Supplementary material for: The integrated analysis of RNA-seq and microRNA-seq depicts miRNA-mRNA networks involved in Japanese flounder (Paralichthys olivaceus) albinism
Source: PubMed Central journal article supplement (PMC5544202; doi:10.1371/journal.pone.0181761), 2017-08-04
Supplement: pone.0181761.s008.pdf [file pone.0181761.s008.pdf]

**S4 Table. The summary information of RNA-seq reads.**

| Sample name | Raw reads | Clean reads | Clean bases | Error rate(%) | Q20(%) | Q30(%) | GC content(%) |
|-------------|-----------|-------------|-------------|---------------|--------|--------|---------------|
| PO_con1_1   | 35916787  | 34279317    | 4.28G       | 0.03          | 96.33  | 92.5   | 51.39         |
| PO_con1_2   | 35916787  | 34279317    | 4.28G       | 0.04          | 95.03  | 90.52  | 51.4          |
| PO_con2_1   | 32490818  | 31723503    | 3.97G       | 0.03          | 96.12  | 92.18  | 50.37         |
| PO_con2_2   | 32490818  | 31723503    | 3.97G       | 0.04          | 94.62  | 89.86  | 50.38         |
| PO_con3_1   | 31290871  | 30636852    | 3.83G       | 0.03          | 96.12  | 92.14  | 50.49         |
| PO_con3_2   | 31290871  | 30636852    | 3.83G       | 0.04          | 94.57  | 89.79  | 50.5          |
| PO_alb1_1   | 31563378  | 30708267    | 3.84G       | 0.03          | 96.17  | 92.26  | 50.47         |
| PO_alb1_2   | 31563378  | 30708267    | 3.84G       | 0.04          | 94.58  | 89.8   | 50.48         |
| PO_alb2_1   | 33093738  | 31968556    | 4G          | 0.03          | 96.04  | 92.01  | 50.73         |
| PO_alb2_2   | 33093738  | 31968556    | 4G          | 0.04          | 94.17  | 89.11  | 50.74         |
| PO_alb3_1   | 31370982  | 30617716    | 3.83G       | 0.03          | 96.23  | 92.34  | 51            |
| PO_alb3_2   | 31370982  | 30617716    | 3.83G       | 0.04          | 94.54  | 89.74  | 51            |
