# Supplementary material for: The integrated analysis of RNA-seq and microRNA-seq depicts miRNA-mRNA networks involved in Japanese flounder (Paralichthys olivaceus) albinism
Source: PubMed Central journal article supplement (PMC5544202; doi:10.1371/journal.pone.0181761), 2017-08-04
Supplement: pone.0181761.s009.pdf [file pone.0181761.s009.pdf]

**S5 Table. The differentially expressed genes between PO\_alb and PO\_con ( $p \leq 0.05$ ).**

| Gene_id    | readcount<br>PO_alb | readcount<br>PO_con | log2FC  | pval     | padj     | gene description                                                                       |
|------------|---------------------|---------------------|---------|----------|----------|----------------------------------------------------------------------------------------|
| GS_001665  | 0                   | 7.951319            | Inf     | 0.00023  | 0.02402  | DLGP2_MOUSE Disks large-associated protein 2 Dlgap2                                    |
| GS_005670  | 0                   | 9.378123            | Inf     | 4.83E-05 | 0.0062   | EZRI_HUMAN Ezrin EZR                                                                   |
| GS_014569  | 0                   | 9.507661            | Inf     | 4.57E-05 | 0.00591  | HMOX2_RAT Heme oxygenase 2 Hmox2                                                       |
| GS_001664  | 0                   | 9.712871            | Inf     | 3.47E-05 | 0.00462  | CYTSA_CHICK Cytospin-A SPECC1L                                                         |
| GS_019678  | 0                   | 11.42221            | Inf     | 6.67E-06 | 0.00105  | NHRF3_RAT Na(+)/H(+) exchange regulatory cofactor NHE-RF3 Pdzk1                        |
| GS_010503  | 0                   | 11.20372            | Inf     | 6.06E-06 | 0.00098  |                                                                                        |
| GS_003950  | 0                   | 36.61633            | Inf     | 3.09E-06 | 0.00054  | S13A5_HUMAN Solute carrier family 13 member 5 SLC13A5                                  |
| GS_019288  | 0                   | 25.51627            | Inf     | 1.04E-11 | 4.09E-09 | S23A1_MOUSE Solute carrier family 23 member 1 Slc23a1                                  |
| GS_011397  | 0                   | 27.60594            | Inf     | 1.39E-12 | 6.14E-10 | MC5R_PANTR Melanocortin receptor 5 MC5R                                                |
| GS_005903  | 0                   | 284.3595            | Inf     | 2.06E-18 | 1.65E-15 | GCH1_HUMAN GTP cyclohydrolase 1 GCH1                                                   |
| GS_000806  | 0                   | 101.0247            | Inf     | 3.59E-21 | 3.25E-18 |                                                                                        |
| GS_000805  | 0                   | 55.58731            | Inf     | 5.38E-22 | 5.60E-19 |                                                                                        |
| GS_000807  | 0.432359            | 521.7506            | -10.237 | 1.14E-77 | 2.37E-73 |                                                                                        |
| GS_011014  | 0.759496            | 834.1087            | -10.101 | 1.63E-11 | 6.28E-09 |                                                                                        |
| GS_013312  | 1.058333            | 500.5233            | -8.8855 | 2.01E-13 | 9.51E-11 | DFP_MANSE Putative defense protein Hdd11-like                                          |
| GS_011013  | 2.722316            | 1179.75             | -8.7594 | 4.27E-16 | 2.69E-13 | HEBP2_HUMAN Heme-binding protein 2 HEBP2                                               |
| GS_020687  | 0.96726             | 381.9457            | -8.6252 | 1.95E-16 | 1.31E-13 | TM130_HUMAN Transmembrane protein 130 TMEM130                                          |
| GS_008748  | 2.159115            | 803.6782            | -8.54   | 7.31E-23 | 8.45E-20 | GCH1_HUMAN GTP cyclohydrolase 1 GCH1                                                   |
| GS_005902  | 3.114906            | 1056.709            | -8.4062 | 1.71E-17 | 1.18E-14 | GCH1_RAT GTP cyclohydrolase 1 Gch1                                                     |
| Novel00024 | 15.73442            | 3120.104            | -7.6315 | 5.00E-12 | 2.04E-09 |                                                                                        |
| GS_020150  | 0.640124            | 122.8345            | -7.5841 | 1.37E-22 | 1.50E-19 | KINH_RAT Kinesin-1 heavy chain Kif5b                                                   |
| Novel00023 | 1.308547            | 240.4501            | -7.5216 | 4.63E-50 | 4.82E-46 |                                                                                        |
| GS_013228  | 1.072483            | 187.5607            | -7.4503 | 1.08E-15 | 6.61E-13 | GCH1_HUMAN GTP cyclohydrolase 1 GCH1                                                   |
| GS_007330  | 0.745346            | 111.0871            | -7.2196 | 6.15E-33 | 1.07E-29 | NCKX3_HUMAN Sodium/potassium/calcium exchanger 3 SLC24A3                               |
| Novel00307 | 3.126376            | 373.3751            | -6.9    | 1.71E-13 | 8.27E-11 |                                                                                        |
| GS_006908  | 1.920371            | 219.4224            | -6.8362 | 3.14E-13 | 1.45E-10 | PLPL2_HUMAN Patatin-like phospholipase domain-containing protein 2 PNPLA2              |
| GS_008590  | 5.388033            | 562.8665            | -6.7069 | 4.05E-09 | 1.16E-06 | FICA_AGKHB Salmorin subunit A                                                          |
| GS_002043  | 0.327137            | 33.44125            | -6.6756 | 5.47E-09 | 1.54E-06 | MITF_MOUSE Microphthalmia-associated transcription factor Mitf                         |
| GS_003739  | 4.588768            | 456.8645            | -6.6375 | 3.12E-12 | 1.35E-09 | BDH_MOUSE D-beta-hydroxybutyrate dehydrogenase, mitochondrial Bdh1                     |
| GS_001154  | 2.799239            | 252.6781            | -6.4961 | 1.06E-36 | 3.14E-33 | KINH_HUMAN Kinesin-1 heavy chain KIF5B                                                 |
| GS_002818  | 0.654274            | 58.31492            | -6.4778 | 7.91E-09 | 2.14E-06 | S6A11_RAT Sodium- and chloride-dependent GABA transporter 3 Slc6a11                    |
| GS_018011  | 4.565765            | 402.1071            | -6.4606 | 1.97E-28 | 2.74E-25 | GTR11_HUMAN Solute carrier family 2, facilitated glucose transporter member 11 SLC2A11 |

|            |          |          |         |          |          |             |                                                                      |
|------------|----------|----------|---------|----------|----------|-------------|----------------------------------------------------------------------|
| GS_007124  | 3.035303 | 266.3156 | -6.4552 | 7.74E-22 | 7.67E-19 | SPRE_XENLA  | Sepiapterin reductase spr                                            |
| GS_007057  | 0.327137 | 28.5148  | -6.4457 | 3.32E-10 | 1.11E-07 | S41A2_CHICK | Solute carrier family 41 member 2 SLC41A2                            |
| GS_020470  | 9.043201 | 750.6705 | -6.3752 | 8.34E-18 | 5.99E-15 | TT39B_XENTR | Tetratricopeptide repeat protein 39B ttc39b                          |
| GS_005953  | 0.432359 | 33.98929 | -6.2967 | 1.02E-13 | 5.03E-11 | PHOS_MOUSE  | Phosducin Pdc                                                        |
| Novel00653 | 0.864718 | 59.51106 | -6.1048 | 3.38E-14 | 1.76E-11 |             |                                                                      |
| GS_007052  | 16.76795 | 988.6148 | -5.8816 | 7.78E-14 | 3.95E-11 | DYR_SHV21   | Viral dihydrofolate reductase DHFR                                   |
| GS_003590  | 3.976944 | 210.2207 | -5.7241 | 1.28E-06 | 0.00025  | PMEL_CHICK  | Melanocyte protein PMEL PMEL                                         |
| GS_015726  | 4.542825 | 236.5917 | -5.7027 | 3.39E-43 | 2.35E-39 | RFT2_SALSA  | Riboflavin transporter 2 r rft2                                      |
| GS_001157  | 0.640124 | 29.92103 | -5.5467 | 2.88E-11 | 1.05E-08 | ABP1_RAT    | Amiloride-sensitive amine oxidase [copper-containing] Abp1           |
| GS_005047  | 4.204218 | 193.1395 | -5.5217 | 4.05E-15 | 2.28E-12 | PLIN2_BOVIN | Perilipin-2 PLIN2                                                    |
| GS_014478  | 0.327137 | 12.77179 | -5.2869 | 9.75E-06 | 0.00152  | TBX19_CANFA | T-box transcription factor TBX19 TBX19                               |
| GS_001546  | 3.976944 | 137.5623 | -5.1123 | 0.00022  | 0.02347  | OSTCN_SPAAU | Osteocalcin bglap                                                    |
| GS_020975  | 1.610064 | 50.89513 | -4.9823 | 1.31E-15 | 7.81E-13 | TYRO_ORYLA  | Tyrosinase tyr                                                       |
| GS_009038  | 9.327824 | 289.2796 | -4.9548 | 2.79E-40 | 1.16E-36 | TYRP1_HUMAN | 5,6-dihydroxyindole-2-carboxylic acid oxidase TYRP1                  |
| GS_010733  | 4.813363 | 145.2044 | -4.9149 | 1.45E-30 | 2.15E-27 | RDH11_MOUSE | Retinol dehydrogenase 11 Rdh11                                       |
| GS_007143  | 7.979508 | 240.0816 | -4.9111 | 1.38E-37 | 4.80E-34 | ADA2B_DANRE | Alpha-2B adrenergic receptor adra2b                                  |
| GS_016824  | 0.312987 | 9.342832 | -4.8997 | 0.00029  | 0.02924  | KACB_RAT    | Ig kappa chain C region, B allele                                    |
| GS_012029  | 9.905239 | 292.5663 | -4.8844 | 3.55E-33 | 6.72E-30 | TYRP1_BOVIN | 5,6-dihydroxyindole-2-carboxylic acid oxidase TYRP1                  |
| GS_000169  | 3.766499 | 106.9919 | -4.8281 | 6.44E-13 | 2.91E-10 | RGS8_DANRE  | Regulator of G-protein signaling 8 rgs8                              |
| GS_004712  | 12.51965 | 345.3098 | -4.7856 | 1.18E-41 | 6.12E-38 | F123A_HUMAN | Protein FAM123A FAM123A                                              |
| GS_017984  | 0.312987 | 8.626111 | -4.7845 | 0.00055  | 0.04891  | LIX1_CHICK  | Protein limb expression 1 LIX1                                       |
| GS_000623  | 3.083926 | 78.97306 | -4.6785 | 4.28E-07 | 9.10E-05 | HVCM_HETFR  | Ig heavy chain C region, membrane-bound form                         |
| GS_012545  | 5.823886 | 144.1497 | -4.6294 | 2.74E-26 | 3.57E-23 | K1C18_PROAT | Keratin, type I cytoskeletal 18 krt18                                |
| GS_003949  | 7.12283  | 163.5666 | -4.5213 | 7.24E-09 | 2.01E-06 | S47A1_DANRE | Multidrug and toxin extrusion protein 1 slc47a1                      |
| GS_017127  | 8.138649 | 176.0336 | -4.4349 | 2.22E-14 | 1.19E-11 | CCD18_HUMAN | Coiled-coil domain-containing protein 18 CCDC18                      |
| GS_014384  | 4.306761 | 92.26403 | -4.4211 | 3.81E-16 | 2.48E-13 | RETST_DANRE | Putative all-trans-retinol 13,14-reductase retsat                    |
| GS_019504  | 1.817829 | 38.3572  | -4.3992 | 3.53E-12 | 1.50E-09 | TRPC2_RAT   | Short transient receptor potential channel 2 Trpc2                   |
| GS_007375  | 4.213008 | 79.84825 | -4.2443 | 8.11E-19 | 7.04E-16 | S22A7_BOVIN | Solute carrier family 22 member 7 SLC22A7                            |
| GS_000869  | 14.69292 | 277.1858 | -4.2377 | 6.07E-34 | 1.26E-30 | MAR1_HUMAN  | Melanoma antigen recognized by T-cells 1 MLANA                       |
| GS_011724  | 17.27374 | 314.8135 | -4.1878 | 1.19E-34 | 2.76E-31 | KAP1_HUMAN  | cAMP-dependent protein kinase type I-beta regulatory subunit PRKAR1B |
| GS_013459  | 2.932761 | 51.79571 | -4.1425 | 2.95E-05 | 0.00401  | SIX3_CHICK  | Homeobox protein SIX3 SIX3                                           |
| GS_014376  | 1.803679 | 31.72671 | -4.1367 | 8.52E-08 | 2.06E-05 | S6A13_MOUSE | Sodium- and chloride-dependent GABA transporter 2 Slc6a13            |
| GS_013990  | 1.058333 | 17.52303 | -4.0494 | 2.63E-06 | 0.00047  | FSTL5_HUMAN | Follistatin-related protein 5 FSTL5                                  |
| GS_012501  | 1.058333 | 16.47145 | -3.9601 | 5.86E-06 | 0.00095  | BMP1_HUMAN  | Bone morphogenetic protein 1 BMP1                                    |
| GS_017193  | 1.39962  | 21.25818 | -3.9249 | 1.69E-06 | 0.00031  | P_PIG       | P protein Oca2                                                       |
| GS_000839  | 30.67226 | 448.7595 | -3.8709 | 9.72E-35 | 2.53E-31 | VIME_ONCMY  | Vimentin vim                                                         |
| GS_008733  | 5.271341 | 68.7828  | -3.7058 | 3.55E-15 | 2.05E-12 |             |                                                                      |

|            |          |          |         |          |          |                                                                                     |
|------------|----------|----------|---------|----------|----------|-------------------------------------------------------------------------------------|
| GS_014490  | 7.166093 | 91.58415 | -3.6758 | 5.59E-18 | 4.31E-15 | XDH_HUMAN Xanthine dehydrogenase/oxidase XDH                                        |
| GS_020483  | 44.4031  | 537.9631 | -3.5988 | 2.19E-32 | 3.50E-29 | LX15B_RAT Arachidonate 15-lipoxygenase B Alox15b                                    |
| GS_010033  | 1.504842 | 17.47724 | -3.5378 | 1.10E-05 | 0.00169  | ARL4C_MOUSE ADP-ribosylation factor-like protein 4C Arl4c                           |
| GS_020215  | 4.184709 | 44.96788 | -3.4257 | 2.79E-06 | 0.00049  | PO2F3_RAT POU domain, class 2, transcription factor 3 Pou2f3                        |
| GS_006323  | 11.31982 | 120.5895 | -3.4132 | 1.49E-18 | 1.24E-15 | DLRB2_BOVIN Dynein light chain roadblock-type 2 DYNLRB2                             |
| GS_006432  | 22.31251 | 234.4571 | -3.3934 | 8.17E-18 | 5.99E-15 | ADCY5_HUMAN Adenylate cyclase type 5 ADCY5                                          |
| GS_019698  | 2.770939 | 28.61049 | -3.3681 | 1.14E-07 | 2.71E-05 | MAP6_CHICK Microtubule-associated protein 6 homolog MAP6                            |
| GS_018288  | 2.35273  | 23.23004 | -3.3036 | 1.58E-06 | 0.0003   | MCHR2_MACFA Melanin-concentrating hormone receptor 2 MCHR2                          |
| GS_019585  | 2.665717 | 25.8945  | -3.28   | 7.92E-05 | 0.00942  | ENDD1_HUMAN Endonuclease domain-containing 1 protein ENDOD1                         |
| GS_020808  | 7.997151 | 76.89337 | -3.2653 | 2.76E-05 | 0.00384  | DCE1_HUMAN Glutamate decarboxylase 1 GAD1                                           |
| GS_002681  | 1.951351 | 18.31033 | -3.2301 | 1.22E-05 | 0.00185  | DRD5L_TAKRU D(5)-like dopamine receptor dl                                          |
| Novel00277 | 6.876046 | 62.79535 | -3.191  | 5.63E-05 | 0.00706  |                                                                                     |
| GS_020430  | 1.831979 | 16.65331 | -3.1843 | 3.54E-05 | 0.00467  | Y8948_DICDI Putative methyltransferase DDB_G0268948 DDB_G0268948                    |
| GS_014685  | 5.777943 | 52.01708 | -3.1704 | 1.10E-10 | 3.82E-08 | GTR9_HUMAN Solute carrier family 2, facilitated glucose transporter member 9 SLC2A9 |
| GS_015091  | 3.098076 | 26.82902 | -3.1143 | 5.87E-05 | 0.00727  | PI3R6_MOUSE Phosphoinositide 3-kinase regulatory subunit 6 Pik3r6                   |
| GS_002625  | 10.80973 | 92.73437 | -3.1008 | 0.00035  | 0.03402  | IL1B_ONCMY Interleukin-1 beta il1b                                                  |
| GS_014684  | 4.121936 | 32.90253 | -2.9968 | 1.53E-07 | 3.49E-05 | GTR9_PONAB Solute carrier family 2, facilitated glucose transporter member 9 SLC2A9 |
| Novel00559 | 14.39757 | 108.2886 | -2.911  | 2.23E-14 | 1.19E-11 |                                                                                     |
| GS_012394  | 16.78746 | 124.5129 | -2.8908 | 6.45E-08 | 1.58E-05 | TRY3_CHICK Trypsin II-P29                                                           |
| GS_000962  | 5.436657 | 38.26595 | -2.8153 | 1.36E-07 | 3.19E-05 | SPIR1_DANRE Protein spire homolog 1 spire1                                          |
| GS_013701  | 3.485306 | 24.51692 | -2.8144 | 1.56E-05 | 0.00228  | RASFA_HUMAN Ras association domain-containing protein 10 RASSF10                    |
| GS_007378  | 3.988414 | 27.31687 | -2.7759 | 2.22E-05 | 0.00317  | MSHR_CHICK Melanocyte-stimulating hormone receptor MC1R                             |
| GS_000153  | 4.392473 | 27.54853 | -2.6489 | 1.03E-05 | 0.00159  | NCAM2_HUMAN Neural cell adhesion molecule 2 NCAM2                                   |
| GS_016413  | 3.411063 | 21.09315 | -2.6285 | 6.74E-05 | 0.0082   | CA106_HUMAN Uncharacterized protein C1orf106 C1orf106                               |
| GS_012916  | 5.837222 | 35.13345 | -2.5895 | 4.89E-07 | 0.0001   | S45A2_MOUSE Membrane-associated transporter protein Slc45a2                         |
| GS_000622  | 18.59026 | 108.0145 | -2.5386 | 5.74E-12 | 2.30E-09 | MUCM ICTPU Ig mu chain C region membrane-bound form                                 |
| GS_000397  | 6.853106 | 39.47936 | -2.5263 | 2.70E-07 | 5.99E-05 | CNTN4_MOUSE Contactin-4 Cntn4                                                       |
| GS_002614  | 12.57445 | 72.26562 | -2.5228 | 5.32E-10 | 1.73E-07 | GPR21_HUMAN Probable G-protein coupled receptor 21 GPR21                            |
| GS_014714  | 22.41773 | 128.6525 | -2.5208 | 3.47E-06 | 0.00059  | XYLT1_PANTR Xylosyltransferase 1 XYLT1                                              |
| GS_016285  | 239.1776 | 1363.875 | -2.5116 | 1.54E-21 | 1.46E-18 | S10I ICTPU Ictacalcin                                                               |
| GS_021169  | 2.890312 | 16.36028 | -2.5009 | 0.00046  | 0.0425   | NSG2_HUMAN Neuron-specific protein family member 2 NSG2                             |
| GS_016151  | 3.259898 | 18.28687 | -2.4879 | 0.00024  | 0.02501  |                                                                                     |
| Novel00658 | 4.71961  | 26.05644 | -2.4649 | 3.87E-05 | 0.00503  |                                                                                     |
| GS_005871  | 4.170559 | 22.57227 | -2.4362 | 7.26E-05 | 0.00868  | REP15_HUMAN Rab15 effector protein REP15                                            |
| GS_018934  | 3.368614 | 18.11021 | -2.4266 | 0.00046  | 0.0429   | RGR_HUMAN RPE-retinal G protein-coupled receptor RGR                                |
| GS_017738  | 7.845986 | 40.82365 | -2.3794 | 1.04E-06 | 0.0002   | NPDC1_HUMAN Neural proliferation differentiation and control protein 1 NPDC1        |
| Novel00253 | 4.941525 | 25.54493 | -2.37   | 8.03E-05 | 0.0095   |                                                                                     |

|            |          |          |         |          |          |             |                                                                                    |             |
|------------|----------|----------|---------|----------|----------|-------------|------------------------------------------------------------------------------------|-------------|
| GS_006767  | 25.88451 | 128.3609 | -2.31   | 2.86E-11 | 1.05E-08 | ALK_MOUSE   | ALK tyrosine kinase receptor                                                       | Alk         |
| GS_007760  | 20.2313  | 96.4254  | -2.2528 | 0.00027  | 0.02735  | CP26C_HUMAN | Cytochrome P450 26C1                                                               | CYP26C1     |
| GS_013111  | 6.878725 | 32.47642 | -2.2392 | 2.80E-05 | 0.00385  | NSMA2_MOUSE | Sphingomyelin phosphodiesterase 3                                                  | Smpd3       |
| Novel00376 | 81.16629 | 382.6342 | -2.237  | 2.11E-09 | 6.28E-07 |             |                                                                                    |             |
| GS_008611  | 21.08001 | 98.59651 | -2.2257 | 1.12E-09 | 3.49E-07 | ADRB1_XENLA | Beta-1 adrenergic receptor                                                         | adrb1       |
| GS_016109  | 20.27195 | 93.37405 | -2.2035 | 6.09E-07 | 0.00012  | SCG3_MOUSE  | Secretogranin-3                                                                    | Scg3        |
| GS_004597  | 33.53328 | 154.3529 | -2.2026 | 2.66E-11 | 1.01E-08 | MREG_DANRE  | Melanoregulin                                                                      | mreg        |
| GS_005905  | 41.65073 | 191.2326 | -2.1989 | 5.80E-06 | 0.00095  | GILT_BOVIN  | Gamma-interferon-inducible lysosomal thiol reductase                               | IFI30       |
| GS_006243  | 46.06882 | 209.6656 | -2.1862 | 1.52E-05 | 0.00226  | S6A13_MACFA | Sodium- and chloride-dependent GABA transporter 2                                  | SLC6A13     |
| GS_021002  | 8.633781 | 39.2703  | -2.1854 | 8.05E-06 | 0.00126  | PNPH_HUMAN  | Purine nucleoside phosphorylase                                                    | PNP         |
| GS_021141  | 37.53072 | 169.4484 | -2.1747 | 4.76E-12 | 1.98E-09 | CXA5_CHICK  | Gap junction alpha-5 protein                                                       | GJA5        |
| GS_001783  | 12.06517 | 54.21062 | -2.1677 | 7.03E-07 | 0.00014  | KNG_ANAMI   | Kininogen (Fragments)                                                              |             |
| GS_009046  | 17.25429 | 76.74461 | -2.1531 | 1.44E-08 | 3.79E-06 | KIT_TAKRU   | Mast/stem cell growth factor receptor                                              | kit         |
| GS_008564  | 36.46248 | 160.9072 | -2.1417 | 5.05E-11 | 1.81E-08 | PRLR_CEREL  | Prolactin receptor                                                                 | PRLR        |
| GS_015155  | 18.90942 | 82.57596 | -2.1266 | 1.60E-08 | 4.16E-06 | PCDH9_HUMAN | Protocadherin-9                                                                    | PCDH9       |
| GS_007401  | 18.48673 | 79.84006 | -2.1106 | 4.29E-08 | 1.06E-05 | SPON1_HUMAN | Spondin-1                                                                          | SPON1       |
| GS_013586  | 34.09485 | 146.0954 | -2.0993 | 0.00043  | 0.04078  | RASEF_HUMAN | Ras and EF-hand domain-containing protein                                          | RASEF       |
| GS_011506  | 30.12589 | 128.0548 | -2.0877 | 3.47E-10 | 1.15E-07 | ARG33_HUMAN | Rho guanine nucleotide exchange factor 33                                          | ARHGEF33    |
| GS_006925  | 65.93585 | 275.9091 | -2.0651 | 1.66E-06 | 0.00031  | PGS1_CANFA  | Biglycan                                                                           | BGN         |
| GS_005244  | 7.792067 | 32.53383 | -2.0619 | 5.05E-05 | 0.00641  |             |                                                                                    |             |
| GS_010316  | 7.47908  | 31.22339 | -2.0617 | 5.45E-05 | 0.00688  | GPR61_MOUSE | Probable G-protein coupled receptor 61                                             | Gpr61       |
| GS_003202  | 9.871579 | 40.69411 | -2.0435 | 3.85E-05 | 0.00503  | CRFR1_CHICK | Corticotropin-releasing factor receptor 1                                          | CRHR1       |
| GS_008220  | 20.1216  | 79.23461 | -1.9774 | 1.15E-07 | 2.71E-05 | AHNAK_HUMAN | Neuroblast differentiation-associated protein                                      | AHNAK AHNAK |
| GS_018838  | 30.16915 | 117.719  | -1.9642 | 7.49E-09 | 2.05E-06 | K1C13_ONCMY | Keratin, type I cytoskeletal 13                                                    | krt13       |
| GS_020582  | 57.56468 | 222.0361 | -1.9475 | 1.08E-10 | 3.80E-08 | TRPM1_RAT   | Transient receptor potential cation channel subfamily M member 1                   | Trpm1       |
| Novel00096 | 242.7738 | 935.453  | -1.9461 | 8.12E-05 | 0.00955  |             |                                                                                    |             |
| GS_009135  | 26.91729 | 100.2918 | -1.8976 | 3.85E-08 | 9.78E-06 | PDE8B_HUMAN | High affinity cAMP-specific and IBMX-insensitive 3',5'-cyclic phosphodiesterase 8B |             |
| GS_015133  | 20.55664 | 76.22935 | -1.8907 | 3.37E-07 | 7.23E-05 | PRDC1_XENLA | Phosphoribosyltransferase domain-containing protein 1                              | prtdc1      |
| GS_009601  | 12.49217 | 45.93848 | -1.8787 | 3.30E-05 | 0.00444  | PLD3A_DANRE | 1-phosphatidylinositol-4,5-bisphosphate phosphodiesterase delta-3-A                | plcd3a      |
| GS_018722  | 37.75956 | 138.3946 | -1.8739 | 3.27E-07 | 7.09E-05 |             |                                                                                    |             |
| GS_014594  | 23.51234 | 85.99608 | -1.8709 | 2.94E-07 | 6.44E-05 | FCAMR_MOUSE | High affinity immunoglobulin alpha and immunoglobulin mu Fc receptor               | Fcamr       |
| GS_015735  | 47.70114 | 172.5983 | -1.8553 | 1.71E-09 | 5.15E-07 | LMNA_XENLA  | Lamin-A                                                                            | lmna        |
| GS_016610  | 78.78176 | 282.223  | -1.8409 | 1.78E-10 | 6.09E-08 | PDE10_HUMAN | cAMP and cAMP-inhibited cGMP 3',5'-cyclic phosphodiesterase 10A                    | PDE10A      |
| GS_008205  | 39.50128 | 140.617  | -1.8318 | 6.48E-06 | 0.00103  | FXI1C_XENLA | Forkhead box protein I1c                                                           | foxi1c      |
| GS_021037  | 16.10221 | 57.24474 | -1.8299 | 0.00036  | 0.03427  | I17EL_HUMAN | Putative interleukin-17 receptor E-like                                            | IL17REL     |
| GS_011079  | 9.667309 | 34.01151 | -1.8148 | 0.00054  | 0.0485   | SDK2_MOUSE  | Protein sidekick-2                                                                 | Sdk2        |
| GS_005575  | 9.313738 | 32.65683 | -1.81   | 0.00013  | 0.01496  | NCF1_BOVIN  | Neutrophil cytosol factor 1                                                        | NCF1        |

|            |          |          |         |          |          |             |                                                               |
|------------|----------|----------|---------|----------|----------|-------------|---------------------------------------------------------------|
| GS_005605  | 43.67028 | 151.0734 | -1.7905 | 2.17E-06 | 0.00039  | COEA1_MOUSE | Collagen alpha-1(XIV) chain Col14a1                           |
| Novel00152 | 26.7023  | 91.01107 | -1.7691 | 5.02E-05 | 0.00641  |             |                                                               |
| GS_017609  | 100.2169 | 332.3031 | -1.7294 | 5.80E-06 | 0.00095  | ENTP5_CHICK | Ectonucleoside triphosphate diphosphohydrolase 5 ENTPD5       |
| GS_009156  | 13.22255 | 43.79131 | -1.7276 | 9.35E-05 | 0.01093  | FOXD2_XENLA | Forkhead box protein D2 foxd2                                 |
| GS_012661  | 81.67476 | 270.4512 | -1.7274 | 1.49E-09 | 4.55E-07 | SOX10_CHICK | Transcription factor SOX-10 SOX10                             |
| GS_021046  | 12.31538 | 40.64987 | -1.7228 | 0.00019  | 0.02056  | WNT7B_CHICK | Protein Wnt-7b WNT7B                                          |
| GS_013840  | 22.75552 | 74.61966 | -1.7133 | 3.13E-06 | 0.00054  | FMN2_HUMAN  | Formin-2 FMN2                                                 |
| GS_003635  | 20.40361 | 66.03142 | -1.6943 | 1.82E-05 | 0.00264  | PDIA1_BOVIN | Protein disulfide-isomerase P4HB                              |
| GS_016650  | 27.70322 | 87.15208 | -1.6535 | 3.17E-06 | 0.00054  | BAI3_MOUSE  | Brain-specific angiogenesis inhibitor 3 Bai3                  |
| GS_013618  | 50.197   | 157.0913 | -1.6459 | 1.39E-07 | 3.21E-05 | PRDM1_HUMAN | PR domain zinc finger protein 1 PRDM1                         |
| GS_021359  | 95.20214 | 290.75   | -1.6107 | 3.71E-08 | 9.53E-06 | PANX3_MOUSE | Pannexin-3 Panx3                                              |
| GS_018129  | 553.4878 | 1676.511 | -1.5988 | 4.62E-07 | 9.72E-05 | KCRB_HUMAN  | Creatine kinase B-type CKB                                    |
| GS_015243  | 48.87063 | 145.0143 | -1.5692 | 0.00022  | 0.02347  | VTCN1_RAT   | V-set domain-containing T-cell activation inhibitor 1 Vtcn1   |
| GS_003795  | 127.131  | 373.7051 | -1.5556 | 3.15E-05 | 0.00426  | PTC1_DANRE  | Protein patched homolog 1 ptch1                               |
| GS_015514  | 496.364  | 1438.544 | -1.5351 | 3.48E-05 | 0.00462  | COBA2_HUMAN | Collagen alpha-2(XI) chain COL11A2                            |
| Novel00572 | 174.3427 | 503.6639 | -1.5305 | 1.23E-05 | 0.00186  |             |                                                               |
| GS_017985  | 12.69033 | 36.59046 | -1.5277 | 0.00053  | 0.0476   | CCD42_BOVIN | Coiled-coil domain-containing protein 42A CCDC42              |
| GS_019376  | 36.75521 | 105.5109 | -1.5214 | 6.17E-06 | 0.00099  | HS3SB_HUMAN | Heparan sulfate glucosamine 3-O-sulfotransferase 3B1 HS3ST3B1 |
| GS_006912  | 19.46115 | 55.85013 | -1.521  | 0.00024  | 0.02439  | NTF7_DANRE  | Neurotrophin-7 ntf7                                           |
| GS_010330  | 124.9547 | 356.2072 | -1.5113 | 8.12E-09 | 2.17E-06 | CAH6_HUMAN  | Carbonic anhydrase 6 CA6                                      |
| GS_014863  | 18.42844 | 52.0318  | -1.4975 | 0.00035  | 0.03402  | NEU1A_HUMAN | Neutralized-like protein 1A NEURL                             |
| GS_016931  | 40.33689 | 112.6337 | -1.4815 | 0.00047  | 0.04324  | TAC2N_HUMAN | Tandem C2 domains nuclear protein TC2N                        |
| GS_016790  | 166.6288 | 462.6071 | -1.4731 | 4.06E-08 | 1.02E-05 | AHI1_HUMAN  | Jouberin AHI1                                                 |
| GS_014679  | 10648.78 | 29391    | -1.4647 | 0.00017  | 0.01874  | K1C13_ONCMY | Keratin, type I cytoskeletal 13 krt13                         |
| GS_007694  | 73.15349 | 200.1317 | -1.452  | 2.70E-07 | 5.99E-05 | ALKMO_DANRE | Alkylglycerol monooxygenase agmo                              |
| GS_001171  | 38.69591 | 105.7869 | -1.4509 | 1.53E-05 | 0.00226  | ST17A_RABIT | Serine/threonine-protein kinase 17A STK17A                    |
| GS_004260  | 1226.725 | 3348.968 | -1.4489 | 0.00055  | 0.04891  | FYN_XIPHE   | Tyrosine-protein kinase Fyn fyn                               |
| GS_002722  | 57.28891 | 153.5481 | -1.4224 | 2.01E-06 | 0.00036  | LAMB2_MOUSE | Laminin subunit beta-2 Lamb2                                  |
| GS_014502  | 29.04007 | 77.51998 | -1.4165 | 7.01E-05 | 0.00849  | CDK15_DANRE | Cyclin-dependent kinase 15 cdk15                              |
| GS_010852  | 44.20949 | 116.173  | -1.3938 | 1.78E-05 | 0.00259  | TM119_HUMAN | Transmembrane protein 119 TMEM119                             |
| GS_018226  | 180.2463 | 456.9367 | -1.342  | 5.43E-07 | 0.00011  | ES1_HUMAN   | ES1 protein homolog, mitochondrial C21orf33                   |
| GS_012647  | 166.5968 | 418.1889 | -1.3278 | 1.12E-06 | 0.00022  | EDNRB_HUMAN | Endothelin B receptor EDNRB                                   |
| GS_014776  | 31.102   | 76.87559 | -1.3055 | 0.00015  | 0.01621  | PCD10_HUMAN | Protocadherin-10 PCDH10                                       |
| GS_016685  | 69.94283 | 160.3735 | -1.1972 | 7.12E-05 | 0.00856  | MSMB_PIG    | Beta-microseminoprotein MSMB                                  |
| GS_008156  | 108.119  | 247.3899 | -1.1942 | 2.50E-05 | 0.00351  | D2_DICDI    | cAMP-regulated D2 protein D2                                  |
| GS_013252  | 53.51169 | 122.1862 | -1.1912 | 0.00017  | 0.01841  | SATT_BOVIN  | Neutral amino acid transporter A SLC1A4                       |
| GS_003179  | 538.0699 | 1224.406 | -1.1862 | 1.58E-06 | 0.0003   |             |                                                               |

|            |          |          |          |          |         |                                                                      |
|------------|----------|----------|----------|----------|---------|----------------------------------------------------------------------|
| GS_020906  | 76.43969 | 170.2609 | -1.1554  | 9.73E-05 | 0.01131 | BACE2_HUMAN Beta-secretase 2 BACE2                                   |
| GS_011190  | 138.667  | 308.6202 | -1.1542  | 6.12E-05 | 0.00754 | RPGP1_HUMAN Rap1 GTPase-activating protein 1 RAP1GAP                 |
| GS_014165  | 72.38483 | 160.5437 | -1.1492  | 0.00013  | 0.01444 | HHIP_HUMAN Hedgehog-interacting protein HHIP                         |
| GS_010295  | 387.5811 | 858.5141 | -1.1473  | 0.00034  | 0.03285 | MMP9_MOUSE Matrix metalloproteinase-9 Mmp9                           |
| GS_015779  | 127.813  | 282.9722 | -1.1466  | 2.07E-05 | 0.00297 | CA216_HUMAN UPF0500 protein C1orf216 C1orf216                        |
| GS_003876  | 40.54926 | 88.92702 | -1.1329  | 0.00044  | 0.04117 | PAX7_MOUSE Paired box protein Pax-7 Pax7                             |
| GS_015428  | 88.89908 | 190.3594 | -1.0985  | 0.00037  | 0.03517 | CNTFR_CHICK Ciliary neurotrophic factor receptor subunit alpha CNTFR |
| GS_018359  | 263.687  | 561.5324 | -1.0905  | 2.49E-05 | 0.00351 | EDNRB_CANFA Endothelin B receptor EDNRB                              |
| GS_008287  | 143.483  | 295.7553 | -1.0435  | 0.00026  | 0.02601 | PRS35_HUMAN Inactive serine protease 35 PRSS35                       |
| GS_010021  | 178.1393 | 349.724  | -0.97321 | 0.00039  | 0.03748 | PHOP1_DANRE Probable phosphatase phospho1 phospho1                   |
| GS_008315  | 291.4098 | 569.3749 | -0.96633 | 0.00025  | 0.02507 | CTGF_PIG Connective tissue growth factor CTGF                        |
| GS_001946  | 151.6316 | 296.0781 | -0.96541 | 0.00053  | 0.04773 | MYO5A_HUMAN Myosin-Va MYO5A                                          |
| GS_005856  | 519.0089 | 988.4966 | -0.92948 | 0.00022  | 0.02329 | SPON1_CHICK Spondin-1 SPON1                                          |
| GS_009380  | 2184.317 | 4124.294 | -0.91697 | 0.00052  | 0.04692 | FRPA_NEIMB Iron-regulated protein frpA serogroup B frpA              |
| GS_015700  | 347.1862 | 177.6938 | 0.96632  | 0.00048  | 0.04383 | DMBT1_HUMAN Deleted in malignant brain tumors 1 protein DMBT1        |
| GS_012001  | 330.5612 | 169.006  | 0.96784  | 0.00021  | 0.02269 | PLIN2_HUMAN Perilipin-2 PLIN2                                        |
| GS_010268  | 359.7647 | 181.0233 | 0.99088  | 0.0002   | 0.02125 | VGFAA_DANRE Vascular endothelial growth factor A-A vegfaa            |
| GS_000538  | 242.3605 | 119.756  | 1.0171   | 0.00026  | 0.02601 | CP2J2_HUMAN Cytochrome P450 2J2 CYP2J2                               |
| GS_020318  | 38280.86 | 18843.51 | 1.0226   | 0.00026  | 0.02631 | DESM_CANFA Desmin DES                                                |
| GS_016447  | 1082.05  | 532.0736 | 1.0241   | 0.00013  | 0.01478 | FA8A1_HUMAN Protein FAM8A1 FAM8A1                                    |
| GS_002994  | 452.2278 | 218.9195 | 1.0466   | 0.00011  | 0.01236 | SAMP_MESAU Serum amyloid P-component APCS                            |
| GS_018185  | 224.4158 | 108.3004 | 1.0511   | 0.00033  | 0.0326  | DSCAM_HUMAN Down syndrome cell adhesion molecule DSCAM               |
| GS_011788  | 1622.507 | 775.9816 | 1.0641   | 0.00034  | 0.03285 |                                                                      |
| GS_006756  | 220.2531 | 102.7698 | 1.0997   | 0.00013  | 0.0149  | CF162_HUMAN UPF0708 protein C6orf162 C6orf162                        |
| GS_002188  | 193.7795 | 90.27409 | 1.102    | 0.00012  | 0.01401 | AQP7_MOUSE Aquaporin-7 Aqp7                                          |
| GS_018739  | 878.7827 | 408.9483 | 1.1036   | 0.00038  | 0.03652 | EPD_CYPKA Ependymin epd                                              |
| GS_003073  | 55213.96 | 25616.33 | 1.108    | 0.00053  | 0.0476  | HSP7C_RAT Heat shock cognate 71 kDa protein Hspa8                    |
| Novel00681 | 91.3119  | 41.68308 | 1.1313   | 0.0005   | 0.04585 |                                                                      |
| GS_017957  | 638.6058 | 287.0637 | 1.1536   | 5.85E-06 | 0.00095 | SXT2_TAKPA Saxitoxin and tetrodotoxin-binding protein 2 psbp2        |
| GS_002995  | 286.9177 | 128.6611 | 1.1571   | 5.71E-05 | 0.00712 | CRP_RAT C-reactive protein Crp                                       |
| GS_009938  | 143.7901 | 61.7035  | 1.2205   | 0.0001   | 0.0117  | DHB14_BOVIN 17-beta-hydroxysteroid dehydrogenase 14 HSD17B14         |
| GS_015381  | 720.1119 | 304.6461 | 1.2411   | 2.74E-05 | 0.00383 | MT21C_BOVIN Methyltransferase-like protein 21C METTL21C              |
| GS_006488  | 104.8874 | 44.36897 | 1.2412   | 0.00026  | 0.02631 | P2RY8_CHICK P2Y purinoceptor 8 P2RY8                                 |
| GS_007314  | 1520.171 | 603.0046 | 1.334    | 1.62E-06 | 0.0003  | GRN_HUMAN Granulins GRN                                              |
| GS_011843  | 273.7297 | 105.1519 | 1.3803   | 8.79E-07 | 0.00017 | GNS_MOUSE N-acetylglucosamine-6-sulfatase Gns                        |
| GS_009020  | 86.26458 | 32.67895 | 1.4004   | 0.0001   | 0.01196 | GROA_BOVIN Growth-regulated protein homolog alpha                    |
| GS_011555  | 1985.88  | 734.3907 | 1.4352   | 3.19E-06 | 0.00054 | LYSC_PAROL Lysozyme C                                                |

|           |          |          |        |          |          |                                                                      |
|-----------|----------|----------|--------|----------|----------|----------------------------------------------------------------------|
| GS_010525 | 49.83009 | 18.1153  | 1.4598 | 0.00041  | 0.03902  | FABPI_PIG Fatty acid-binding protein, intestinal FABP2               |
| GS_006200 | 44.03189 | 15.75119 | 1.4831 | 0.00044  | 0.04135  | GRM3_RAT Metabotropic glutamate receptor 3 Grm3                      |
| GS_009467 | 129.992  | 45.10918 | 1.5269 | 1.47E-05 | 0.00221  | TNNT2_CHICK Troponin T, cardiac muscle isoforms TNNT2                |
| GS_002131 | 772.4685 | 265.5339 | 1.5406 | 1.10E-09 | 3.45E-07 | MSTN1_XENLA Musculoskeletal embryonic nuclear protein 1 mustn1       |
| GS_007697 | 38.96027 | 12.63197 | 1.6249 | 0.00024  | 0.02443  | SOSD1_MOUSE Sclerostin domain-containing protein 1 Sostdc1           |
| GS_010174 | 5231.999 | 1558.213 | 1.7475 | 6.56E-05 | 0.00803  | LYG_PAROL Lysozyme g                                                 |
| GS_006975 | 3661.067 | 865.7575 | 2.0802 | 2.78E-09 | 8.15E-07 | GLRK_RANBE Probable glutamate receptor                               |
| GS_017925 | 177.8423 | 40.07039 | 2.15   | 0.00015  | 0.01607  | CATL_SARPE Cathepsin L                                               |
| GS_004023 | 24.26654 | 5.355341 | 2.1799 | 0.00022  | 0.02292  | ARL14_HUMAN ADP-ribosylation factor-like protein 14 ARL14            |
| GS_000465 | 58.65324 | 12.18461 | 2.2672 | 1.64E-07 | 3.70E-05 | CO1A2_RABIT Collagen alpha-2(I) chain (Fragment) COL1A2              |
| GS_013015 | 36.71626 | 7.076408 | 2.3753 | 1.44E-06 | 0.00027  | PE2R3_BOVIN Prostaglandin E2 receptor EP3 subtype PTGER3             |
| GS_014186 | 360.8196 | 59.91753 | 2.5902 | 3.53E-06 | 0.00059  | MSLNL_HUMAN Mesothelin-like protein MSLNL                            |
| GS_008785 | 419.4108 | 59.61546 | 2.8146 | 2.81E-05 | 0.00385  | CAH4_BOVIN Carbonic anhydrase 4 CA4                                  |
| GS_000336 | 1969.69  | 276.7654 | 2.8312 | 3.55E-26 | 4.35E-23 | VIAAT_XENTR Vesicular inhibitory amino acid transporter slc32a1      |
| GS_007481 | 965.9608 | 88.82826 | 3.4429 | 8.49E-10 | 2.72E-07 | KCC1G_RAT Calcium/calmodulin-dependent protein kinase type 1G Camk1g |
| GS_002121 | 32.00992 | 1.603362 | 4.3193 | 5.66E-07 | 0.00012  | CIDEC_HUMAN Cell death activator CIDE-3 CIDEC                        |
| GS_019550 | 11.37374 | 0.323018 | 5.1379 | 0.00014  | 0.01515  | CXA3_MOUSE Gap junction alpha-3 protein Gja3                         |
| GS_001591 | 17.81749 | 0        | Inf    | 3.48E-09 | 1.01E-06 | NKX11_HUMAN NK1 transcription factor-related protein 1 NKX1-1        |
