# Supplementary material for: The integrated analysis of RNA-seq and microRNA-seq depicts miRNA-mRNA networks involved in Japanese flounder (Paralichthys olivaceus) albinism
Source: PubMed Central journal article supplement (PMC5544202; doi:10.1371/journal.pone.0181761), 2017-08-04
Supplement: pone.0181761.s010.pdf [file pone.0181761.s010.pdf]

**S6 Table. The GO term enrichment for differentially expressed genes in RNA-seq ( $p \leq 0.05$ ).**

| GO_accession | Description                                         | Term_type          | P-Value  | Corrected P-Value | DEG_item | DEG_list | Bg_item | Bg_list |
|--------------|-----------------------------------------------------|--------------------|----------|-------------------|----------|----------|---------|---------|
| GO:0005576   | extracellular region                                | cellular_component | 9.67E-05 | 0.39588           | 30       | 189      | 1324    | 17379   |
| GO:0004888   | transmembrane signaling receptor activity           | molecular_function | 0.000387 | 0.74866           | 20       | 189      | 789     | 17379   |
| GO:0007186   | G-protein coupled receptor signaling                | biological_process | 0.000744 | 0.74866           | 21       | 189      | 894     | 17379   |
| GO:0004871   | signal transducer activity                          | molecular_function | 0.00094  | 0.74866           | 25       | 189      | 1172    | 17379   |
| GO:0060089   | molecular transducer activity                       | molecular_function | 0.00094  | 0.74866           | 25       | 189      | 1172    | 17379   |
| GO:0007166   | cell surface receptor signaling pathway             | biological_process | 0.001098 | 0.74866           | 23       | 189      | 1052    | 17379   |
| GO:0004930   | G-protein coupled receptor activity                 | molecular_function | 0.001539 | 0.77915           | 16       | 189      | 633     | 17379   |
| GO:0004392   | heme oxygenase (decyclizing) activity               | molecular_function | 0.001714 | 0.77915           | 2        | 189      | 6       | 17379   |
| GO:0006788   | heme oxidation                                      | biological_process | 0.001714 | 0.77915           | 2        | 189      | 6       | 17379   |
| GO:0004872   | receptor activity                                   | molecular_function | 0.001924 | 0.78738           | 21       | 189      | 965     | 17379   |
| GO:0038023   | signaling receptor activity                         | molecular_function | 0.002144 | 0.79752           | 20       | 189      | 908     | 17379   |
| GO:0005882   | intermediate filament                               | cellular_component | 0.002773 | 0.86163           | 6        | 189      | 128     | 17379   |
| GO:0045111   | intermediate filament cytoskeleton                  | cellular_component | 0.002773 | 0.86163           | 6        | 189      | 128     | 17379   |
| GO:0016491   | oxidoreductase activity                             | molecular_function | 0.003148 | 0.86163           | 23       | 189      | 1142    | 17379   |
| GO:0048038   | quinone binding                                     | molecular_function | 0.003159 | 0.86163           | 2        | 189      | 8       | 17379   |
| GO:0015291   | secondary active transmembrane transporter activity | molecular_function | 0.00348  | 0.88988           | 6        | 189      | 134     | 17379   |
| GO:0015293   | symporter activity                                  | molecular_function | 0.005138 | 1                 | 5        | 189      | 102     | 17379   |
| GO:0015294   | solute:cation symporter activity                    | molecular_function | 0.005138 | 1                 | 5        | 189      | 102     | 17379   |
| GO:0044421   | extracellular region part                           | cellular_component | 0.005635 | 1                 | 13       | 189      | 533     | 17379   |
| GO:0008150   | biological_process                                  | biological_process | 0.006997 | 1                 | 151      | 189      | 12486   | 17379   |
| GO:0005578   | proteinaceous extracellular matrix                  | cellular_component | 0.007527 | 1                 | 8        | 189      | 259     | 17379   |
| GO:0007155   | cell adhesion                                       | biological_process | 0.008886 | 1                 | 11       | 189      | 440     | 17379   |
| GO:0006787   | porphyrin-containing compound catabolic process     | biological_process | 0.009819 | 1                 | 2        | 189      | 14      | 17379   |
| GO:0033015   | tetrapyrrole catabolic process                      | biological_process | 0.009819 | 1                 | 2        | 189      | 14      | 17379   |
| GO:0005149   | interleukin-1 receptor binding                      | molecular_function | 0.010868 | 1                 | 1        | 189      | 1       | 17379   |
| GO:0015105   | arsenite transmembrane transporter                  | molecular_function | 0.010881 | 1                 | 1        | 189      | 1       | 17379   |
| GO:0015700   | arsenite transport                                  | biological_process | 0.010881 | 1                 | 1        | 189      | 1       | 17379   |
| GO:0016021   | integral to membrane                                | cellular_component | 0.010964 | 1                 | 43       | 189      | 2808    | 17379   |
| GO:0051187   | cofactor catabolic process                          | biological_process | 0.011249 | 1                 | 2        | 189      | 15      | 17379   |
| GO:0043043   | peptide biosynthetic process                        | biological_process | 0.011257 | 1                 | 2        | 189      | 15      | 17379   |

|            |                                                                                 |                    |          |   |    |     |      |       |
|------------|---------------------------------------------------------------------------------|--------------------|----------|---|----|-----|------|-------|
| GO:0015081 | sodium ion transmembrane transporter activity                                   | molecular_function | 0.011486 | 1 | 5  | 189 | 124  | 17379 |
| GO:0022610 | biological adhesion                                                             | biological_process | 0.011925 | 1 | 11 | 189 | 459  | 17379 |
| GO:0015370 | solute:sodium symporter activity                                                | molecular_function | 0.012277 | 1 | 4  | 189 | 82   | 17379 |
| GO:0031224 | intrinsic to membrane                                                           | cellular_component | 0.012634 | 1 | 43 | 189 | 2832 | 17379 |
| GO:0030203 | glycosaminoglycan metabolic process                                             | biological_process | 0.012783 | 1 | 2  | 189 | 16   | 17379 |
| GO:0031012 | extracellular matrix                                                            | cellular_component | 0.012938 | 1 | 9  | 189 | 343  | 17379 |
| GO:0042710 | biofilm formation                                                               | biological_process | 0.016058 | 1 | 2  | 189 | 18   | 17379 |
| GO:0005326 | neurotransmitter transporter activity                                           | molecular_function | 0.016179 | 1 | 3  | 189 | 49   | 17379 |
| GO:0005328 | neurotransmitter:sodium symporter                                               | molecular_function | 0.016179 | 1 | 3  | 189 | 49   | 17379 |
| GO:0015629 | actin cytoskeleton                                                              | cellular_component | 0.017013 | 1 | 6  | 189 | 188  | 17379 |
| GO:0044430 | cytoskeletal part                                                               | cellular_component | 0.018655 | 1 | 9  | 189 | 365  | 17379 |
| GO:0016459 | myosin complex                                                                  | cellular_component | 0.020121 | 1 | 5  | 189 | 143  | 17379 |
| GO:0005125 | cytokine activity                                                               | molecular_function | 0.02089  | 1 | 3  | 189 | 54   | 17379 |
| GO:0046406 | magnesium protoporphyrin IX methyltransferase activity                          | molecular_function | 0.021608 | 1 | 1  | 189 | 2    | 17379 |
| GO:0003871 | 5-methyltetrahydropteroyltriglutamate-homocysteine S-methyltransferase activity | molecular_function | 0.021628 | 1 | 1  | 189 | 2    | 17379 |
| GO:0042085 | 5-methyltetrahydropteroyltri-L-glutamate-dependent methyltransferase activity   | molecular_function | 0.021628 | 1 | 1  | 189 | 2    | 17379 |
| GO:0006106 | fumarate metabolic process                                                      | biological_process | 0.021628 | 1 | 1  | 189 | 2    | 17379 |
| GO:0008940 | nitrate reductase activity                                                      | molecular_function | 0.02163  | 1 | 1  | 189 | 2    | 17379 |
| GO:0009325 | nitrate reductase complex                                                       | cellular_component | 0.02163  | 1 | 1  | 189 | 2    | 17379 |
| GO:0016661 | oxidoreductase activity, acting on other nitrogenous compounds as donors        | molecular_function | 0.02163  | 1 | 1  | 189 | 2    | 17379 |
| GO:0005615 | extracellular space                                                             | cellular_component | 0.023517 | 1 | 5  | 189 | 149  | 17379 |
| GO:0006836 | neurotransmitter transport                                                      | biological_process | 0.028758 | 1 | 3  | 189 | 61   | 17379 |
| GO:0003774 | motor activity                                                                  | molecular_function | 0.031587 | 1 | 6  | 189 | 217  | 17379 |
| GO:0043604 | amide biosynthetic process                                                      | biological_process | 0.032234 | 1 | 2  | 189 | 26   | 17379 |
| GO:0006545 | glycine biosynthetic process                                                    | biological_process | 0.03226  | 1 | 1  | 189 | 3    | 17379 |
| GO:0043163 | cell envelope organization                                                      | biological_process | 0.032283 | 1 | 1  | 189 | 3    | 17379 |
| GO:0043165 | Gram-negative-bacterium-type cell outer membrane assembly                       | biological_process | 0.032283 | 1 | 1  | 189 | 3    | 17379 |
| GO:0044091 | membrane biogenesis                                                             | biological_process | 0.032283 | 1 | 1  | 189 | 3    | 17379 |
| GO:0071709 | membrane assembly                                                               | biological_process | 0.032283 | 1 | 1  | 189 | 3    | 17379 |
| GO:0008745 | N-acetylmuramoyl-L-alanine amidase activity                                     | molecular_function | 0.032286 | 1 | 1  | 189 | 3    | 17379 |

|            |                                           |                    |          |   |    |     |      |       |
|------------|-------------------------------------------|--------------------|----------|---|----|-----|------|-------|
| GO:0008193 | tRNA guanylyltransferase activity         | molecular_function | 0.03229  | 1 | 1  | 189 | 3    | 17379 |
| GO:0008131 | primary amine oxidase activity            | molecular_function | 0.032291 | 1 | 1  | 189 | 3    | 17379 |
| GO:0030158 | protein xylosyltransferase activity       | molecular_function | 0.032291 | 1 | 1  | 189 | 3    | 17379 |
| GO:0035252 | UDP-xylosyltransferase activity           | molecular_function | 0.032291 | 1 | 1  | 189 | 3    | 17379 |
| GO:0042285 | xylosyltransferase activity               | molecular_function | 0.032291 | 1 | 1  | 189 | 3    | 17379 |
| GO:0022804 | active transmembrane transporter activity | molecular_function | 0.036017 | 1 | 6  | 189 | 224  | 17379 |
| GO:0008009 | chemokine activity                        | molecular_function | 0.041853 | 1 | 2  | 189 | 30   | 17379 |
| GO:0042379 | chemokine receptor binding                | molecular_function | 0.041853 | 1 | 2  | 189 | 30   | 17379 |
| GO:0005215 | transporter activity                      | molecular_function | 0.041977 | 1 | 25 | 189 | 1602 | 17379 |
| GO:0001881 | receptor recycling                        | biological_process | 0.042774 | 1 | 1  | 189 | 4    | 17379 |
| GO:0031047 | gene silencing by RNA                     | biological_process | 0.042781 | 1 | 1  | 189 | 4    | 17379 |
| GO:0009070 | serine family amino acid biosynthetic     | biological_process | 0.042792 | 1 | 1  | 189 | 4    | 17379 |
| GO:0004363 | glutathione synthase activity             | molecular_function | 0.042795 | 1 | 1  | 189 | 4    | 17379 |
| GO:0003796 | lysozyme activity                         | molecular_function | 0.042797 | 1 | 1  | 189 | 4    | 17379 |
| GO:0009086 | methionine biosynthetic process           | biological_process | 0.042806 | 1 | 1  | 189 | 4    | 17379 |
| GO:0042393 | histone binding                           | molecular_function | 0.042809 | 1 | 1  | 189 | 4    | 17379 |
| GO:0006024 | glycosaminoglycan biosynthetic process    | biological_process | 0.042821 | 1 | 1  | 189 | 4    | 17379 |
| GO:0006814 | sodium ion transport                      | biological_process | 0.043742 | 1 | 3  | 189 | 72   | 17379 |
| GO:0005856 | cytoskeleton                              | cellular_component | 0.046457 | 1 | 9  | 189 | 431  | 17379 |
| GO:0044425 | membrane part                             | cellular_component | 0.047625 | 1 | 46 | 189 | 3342 | 17379 |
| GO:0009611 | response to wounding                      | biological_process | 0.047652 | 1 | 4  | 189 | 125  | 17379 |
