# Supplementary material for: The integrated analysis of RNA-seq and microRNA-seq depicts miRNA-mRNA networks involved in Japanese flounder (Paralichthys olivaceus) albinism
Source: PubMed Central journal article supplement (PMC5544202; doi:10.1371/journal.pone.0181761), 2017-08-04
Supplement: pone.0181761.s011.pdf [file pone.0181761.s011.pdf]

**S7 Table. The KEGG pathway enrichment for differentially expressed genes in RNA-seq ( $p \leq 0.05$ ).**

| Pathways                                | ID       | Input number | Background number | P-Value  | Corrected P-Value |
|-----------------------------------------|----------|--------------|-------------------|----------|-------------------|
| Folate biosynthesis                     | tru00790 | 6            | 19                | 1.61E-07 | 9.04E-06          |
| Melanogenesis                           | tru04916 | 10           | 131               | 1.90E-06 | 5.31E-05          |
| Neuroactive ligand-receptor interaction | tru04080 | 11           | 379               | 0.002331 | 0.043509408       |
| Tyrosine metabolism                     | tru00350 | 3            | 35                | 0.006939 | 0.078470987       |
| Cytokine-cytokine receptor interaction  | tru04060 | 6            | 158               | 0.007006 | 0.078470987       |
| Butanoate metabolism                    | tru00650 | 2            | 21                | 0.023155 | 0.180845259       |
| Hedgehog signaling pathway              | tru04340 | 3            | 57                | 0.023907 | 0.180845259       |
| Purine metabolism                       | tru00230 | 6            | 213               | 0.025835 | 0.180845259       |
| Dorso-ventral axis formation            | tru04320 | 2            | 26                | 0.033461 | 0.208202432       |
