# Supplementary material for: The integrated analysis of RNA-seq and microRNA-seq depicts miRNA-mRNA networks involved in Japanese flounder (Paralichthys olivaceus) albinism
Source: PubMed Central journal article supplement (PMC5544202; doi:10.1371/journal.pone.0181761), 2017-08-04
Supplement: pone.0181761.s012.pdf [file pone.0181761.s012.pdf]

**S8 Table. Overview of reads from raw data to cleaned sequences in miRNA-seq.**

| lib                | PO_con1   |            |           |           | PO_con2    |            |           |           | PO_con3    |            |           |           |
|--------------------|-----------|------------|-----------|-----------|------------|------------|-----------|-----------|------------|------------|-----------|-----------|
|                    | Total     | % of Total | uniq      | % of uniq | Total      | % of Total | uniq      | % of uniq | Total      | % of Total | uniq      | % of uniq |
| Raw reads          | 9,960,543 | 100.00     | 1,340,590 | 100       | 10,957,008 | 100.00     | 1,714,953 | 100.00    | 11,060,368 | 100.00     | 1,325,433 | 100.00    |
| 3ADT&length filter | 5,115,072 | 51.35      | 963,763   | 71.89     | 4,879,960  | 44.54      | 1,244,396 | 72.56     | 3,790,145  | 34.27      | 869,460   | 65.60     |
| Junk reads         | 27,464    | 0.28       | 5,125     | 0.38      | 27,423     | 0.25       | 5,602     | 0.33      | 29,957     | 0.27       | 5,891     | 0.44      |
| Rfam               | 503,971   | 5.06       | 35,578    | 2.65      | 797,449    | 7.28       | 48,701    | 2.84      | 559,333    | 5.06       | 40,774    | 3.08      |
| mRNA               | 187,144   | 1.88       | 97,143    | 7.25      | 254,150    | 2.32       | 108,869   | 6.35      | 217,359    | 1.97       | 115,892   | 8.74      |
| Repeats            | 304       | 0.00       | 83        | 0.01      | 456        | 0.00       | 106       | 0.01      | 533        | 0.00       | 122       | 0.01      |
| valid reads        | 4,134,252 | 41.51      | 239,765   | 17.89     | 5,004,942  | 45.68      | 308,437   | 17.99     | 6,467,034  | 58.47      | 294,457   | 22.22     |
| rRNA               | 423,701   | 4.25       | 23,141    | 0.23      | 672,384    | 6.14       | 30,968    | 0.28      | 469,513    | 4.25       | 25,728    | 0.23      |
| tRNA               | 41,274    | 0.41       | 5,213     | 0.05      | 65,413     | 0.60       | 8,360     | 0.08      | 35,322     | 0.32       | 6,340     | 0.06      |
| snoRNA             | 4,663     | 0.05       | 1,555     | 0.02      | 5,636      | 0.05       | 1,830     | 0.02      | 5,896      | 0.05       | 1,844     | 0.02      |
| snRNA              | 4,243     | 0.04       | 1,586     | 0.02      | 6,252      | 0.06       | 2,161     | 0.02      | 6,704      | 0.06       | 2,117     | 0.02      |
| other Rfam RNA     | 30,090    | 0.30       | 4,083     | 0.04      | 47,764     | 0.44       | 5,382     | 0.05      | 41,898     | 0.38       | 4,745     | 0.04      |

  

| lib                | PO_alb1    |            |           |           | PO_alb2   |            |           |           | PO_alb3    |            |           |           |
|--------------------|------------|------------|-----------|-----------|-----------|------------|-----------|-----------|------------|------------|-----------|-----------|
|                    | Total      | % of Total | uniq      | % of uniq | Total     | % of Total | uniq      | % of uniq | Total      | % of Total | uniq      | % of uniq |
| Raw reads          | 10,559,741 | 100.00     | 1,100,934 | 100.00    | 9,702,427 | 100.00     | 1,397,359 | 100.00    | 10,974,117 | 100.00     | 1,325,208 | 100.00    |
| 3ADT&length filter | 3,600,852  | 34.10      | 776,366   | 70.52     | 3,587,089 | 36.97      | 970,881   | 69.48     | 4,102,638  | 37.38      | 949,402   | 71.64     |
| Junk reads         | 8,889      | 0.08       | 3,009     | 0.27      | 26,253    | 0.27       | 4,819     | 0.34      | 26,556     | 0.24       | 4,725     | 0.36      |
| Rfam               | 498,640    | 4.72       | 30,245    | 2.75      | 823,819   | 8.49       | 39,896    | 2.86      | 669,893    | 6.10       | 36,012    | 2.72      |
| mRNA               | 216,013    | 2.05       | 73,351    | 6.66      | 278,528   | 2.87       | 119,548   | 8.56      | 221,772    | 2.02       | 90,765    | 6.85      |
| Repeats            | 79         | 0.00       | 46        | 0.00      | 414       | 0.00       | 101       | 0.01      | 299        | 0.00       | 102       | 0.01      |
| valid reads        | 6,238,636  | 59.08      | 218,445   | 19.84     | 4,989,758 | 51.43      | 263,097   | 18.83     | 5,955,979  | 54.27      | 245,000   | 18.49     |
| rRNA               | 426,821    | 4.04       | 19,195    | 0.18      | 723,251   | 7.45       | 25,469    | 0.26      | 597,114    | 5.44       | 23,295    | 0.21      |
| tRNA               | 39,404     | 0.37       | 5,413     | 0.05      | 50,548    | 0.52       | 6,616     | 0.07      | 36,278     | 0.33       | 5,991     | 0.05      |
| snoRNA             | 2,332      | 0.02       | 1,043     | 0.01      | 4,084     | 0.04       | 1,455     | 0.01      | 3,535      | 0.03       | 1,367     | 0.01      |
| snRNA              | 2,770      | 0.03       | 1,287     | 0.01      | 4,146     | 0.04       | 1,532     | 0.02      | 4,177      | 0.04       | 1,406     | 0.01      |
| other Rfam RNA     | 27,313     | 0.26       | 3,307     | 0.03      | 41,790    | 0.43       | 4,824     | 0.05      | 28,789     | 0.26       | 3,953     | 0.04      |
