# Supplementary material for: The integrated analysis of RNA-seq and microRNA-seq depicts miRNA-mRNA networks involved in Japanese flounder (Paralichthys olivaceus) albinism
Source: PubMed Central journal article supplement (PMC5544202; doi:10.1371/journal.pone.0181761), 2017-08-04
Supplement: pone.0181761.s013.pdf [file pone.0181761.s013.pdf]

**S9 Table. 31 unique miRNAs mapping to Japanese flounder miRNA/pre-miRNAs in miRbase and the pre-miRNAs further map to genome & EST.**

| miRNA_Index | miR_name                 | miR_seq                 | genomeID      | strand | start      | end        | group | Expression level |
|-------------|--------------------------|-------------------------|---------------|--------|------------|------------|-------|------------------|
| 1           | pol-miR-1-5p             | ACATACTTCTTTATATGCCATA  | scaffold37.1  | -      | 1,918,726  | 1,918,822  | gp1a  | middle           |
| 2           | pol-miR-1-3p_1ss2GT      | TTGAATGTAAAGAAGTATGTAT  | scaffold37.1  | -      | 1,918,726  | 1,918,822  | gp1a  | high             |
| 3           | pol-let-7a-5p_1ss19GA    | TGAGGTAGTAGGTTGTATAGTT  | scaffold41.1  | -      | 2,315,191  | 2,315,286  | gp1a  | high             |
| 4           | tni-let-7a-3-p3_1ss22AT  | TACAGTCTATTACCTTCCTTGT  | scaffold41.1  | -      | 2,315,191  | 2,315,286  | gp1a  | middle           |
| 5           | pol-let-7b-5p            | TGAGGTAGTAGGTTGTGTGGTT  | scaffold84.1  | +      | 3,267,040  | 3,267,130  | gp1a  | high             |
| 6           | pol-let-7b-3p_R+1        | CTATACAACCTACTGCCTTCCC  | scaffold84.1  | +      | 3,267,040  | 3,267,130  | gp1a  | middle           |
| 7           | pol-let-7d-5p            | TGAGGTAGTTGGTTGTATGGTT  | scaffold30.1  | -      | 634,790    | 634,885    | gp1a  | high             |
| 8           | pol-let-7d-3p            | CTGTACAACCTTCTAGCTTTCC  | scaffold30.1  | -      | 634,790    | 634,885    | gp1a  | middle           |
| 9           | pol-miR-9b-5p_R-2        | TCTTTGGTTATCTAGCTGTAT   | scaffold32.1  | +      | 637,060    | 637,150    | gp1a  | middle           |
| 10          | pol-miR-9b-3p            | TAAAGCTAGAGAACCGAAAGTA  | scaffold32.1  | +      | 637,060    | 637,150    | gp1a  | middle           |
| 11          | pol-miR-10b-5p_1ss19GT   | TACCCTGTAGAACCGAATTTGT  | scaffold50.1  | +      | 1,275,563  | 1,275,664  | gp1a  | high             |
| 12          | pol-miR-10b-3p_L+2R-2    | ACAGATTCGATTCTAGGGGAGT  | scaffold50.1  | +      | 1,275,563  | 1,275,664  | gp1a  | middle           |
| 13          | pol-miR-21-5p_R+1        | TAGCTTATCAGACTGGTGTGGC  | scaffold10.1  | +      | 9,156,699  | 9,156,779  | gp1a  | high             |
| 14          | pol-miR-21-3p_R-1_1ss14A | CGACAACAGTCTGTAGGCTGT   | scaffold10.1  | +      | 9,156,699  | 9,156,779  | gp1a  | middle           |
| 15          | pol-miR-22-5p_R-1        | AGTTCTTCACTGGCAAGCTTT   | scaffold12.1  | -      | 10,545,611 | 10,545,704 | gp1a  | middle           |
| 16          | pol-miR-22-3p            | AAGCTGCCAGCTGAAGAAGTGT  | scaffold12.1  | -      | 10,545,611 | 10,545,704 | gp1a  | high             |
| 17          | pol-miR-122-5p_R+1       | TGGAGTGTGACAATGGTGTTTGT | scaffold25.1  | -      | 8,220,260  | 8,220,366  | gp1a  | middle           |
| 18          | pol-miR-133-5p           | GCTGGTCAAACGGAACCAAGTC  | scaffold14.1  | +      | 5,270,995  | 5,271,088  | gp1a  | middle           |
| 19          | pol-miR-133-3p           | TTTGGTCCCCTTCAACCAGCT   | scaffold14.1  | +      | 5,270,995  | 5,271,088  | gp1a  | high             |
| 20          | pol-miR-140-5p           | CAGTGGTTTTACCCTATGGTAG  | scaffold104.1 | -      | 798,530    | 798,629    | gp1a  | middle           |
| 21          | pol-miR-140-3p_R+1       | ACCACAGGGTAGAACCACGGACT | scaffold104.1 | -      | 798,530    | 798,629    | gp1a  | middle           |
| 22          | pol-miR-144-5p           | GGATATCATCTTATACTGTAAGT | scaffold10.1  | -      | 8,160,012  | 8,160,085  | gp1a  | middle           |
| 23          | pol-miR-144-3p_L+1R-2    | CTACAGTATAGATGATGTACT   | scaffold10.1  | -      | 8,160,012  | 8,160,085  | gp1a  | middle           |
| 24          | pol-miR-182-5p_R+2       | TTTGCAATGGTAGAACTCACAC  | scaffold84.1  | +      | 6,721,855  | 6,721,950  | gp1a  | middle           |
| 25          | pol-miR-199a-5p_R+1      | CCCAGTGTCAGACTACCTGTTT  | scaffold25.1  | +      | 10,067,215 | 10,067,305 | gp1a  | high             |
| 26          | pol-miR-199a-3p_R-1      | ACAGTAGTCTGCACATTGGTT   | scaffold25.1  | +      | 10,067,215 | 10,067,305 | gp1a  | high             |
| 27          | pol-miR-203-5p_R-1       | AGTGGTTCTCAACAGTTCAACA  | scaffold15.1  | -      | 2,069,503  | 2,069,574  | gp1a  | middle           |
| 28          | pol-miR-203-3p           | GTGAAATGTTTAGGACCACTTG  | scaffold15.1  | -      | 2,069,503  | 2,069,574  | gp1a  | high             |
| 29          | pol-miR-206-5p           | ACATGCTTCCTTATATCCCAT   | scaffold14.1  | +      | 5,270,156  | 5,270,247  | gp1a  | middle           |
| 30          | pol-miR-206-3p_1ss2GT    | TTGAATGTAAGGAAGTGTGTGG  | scaffold14.1  | +      | 5,270,156  | 5,270,247  | gp1a  | high             |
| 31          | pol-miR-221-3p           | AGCTACATTGTCTGCTGGGTTT  | scaffold131.1 | -      | 542,505    | 542,572    | gp1a  | high             |
