# Supplementary material for: The integrated analysis of RNA-seq and microRNA-seq depicts miRNA-mRNA networks involved in Japanese flounder (Paralichthys olivaceus) albinism
Source: PubMed Central journal article supplement (PMC5544202; doi:10.1371/journal.pone.0181761), 2017-08-04
Supplement: pone.0181761.s014.pdf [file pone.0181761.s014.pdf]

**S10 Table. 240 unique miRNAs mapping to selected species (except for Japanese flounder) miRNAs/pre-miRNAs in miRbase and the pre-miRNAs further mapping to the genome & EST.**

| miRNA_Index | miR_name                   | miR_seq                  | genomeID      | strand | start      | end        | group | Expression level |
|-------------|----------------------------|--------------------------|---------------|--------|------------|------------|-------|------------------|
| 1           | mmu-miR-1a-2-5p_R-1        | ACATACTTCTTTATGTACCCAT   | scaffold44.1  | -      | 1,462,613  | 1,462,708  | gp1b  | middle           |
| 2           | dre-miR-1_R+2_1ss2GT       | TTGAATGTAAAGAAGTATGTATTT | scaffold44.1  | -      | 1,462,613  | 1,462,708  | gp1b  | middle           |
| 3           | dre-let-7i                 | TGAGGTAGTAGTTTGTGCTGTT   | scaffold6.1   | -      | 5,626,251  | 5,626,344  | gp1b  | high             |
| 4           | hsa-let-7i-3p              | CTGCGCAAGCTACTGCCTTGCT   | scaffold6.1   | -      | 5,626,251  | 5,626,344  | gp1b  | middle           |
| 5           | dre-let-7a_R+2             | TGAGGTAGTAGGTTGTATAGTTTT | scaffold6.1   | +      | 2,425,339  | 2,425,444  | gp1b  | middle           |
| 6           | ola-let-7a-3p_L-1R+2       | TATACAACCTACTGTCTTTTCCT  | scaffold6.1   | +      | 2,425,339  | 2,425,444  | gp1b  | middle           |
| 7           | dre-let-7c-5p_L+1R-1       | TTGAGGTAGTAGGTTGTATGGT   | scaffold10.1  | +      | 10,697,574 | 10,697,669 | gp1b  | middle           |
| 8           | dre-let-7c-2-p3            | GTTAACTGTACAACCTTCTAGC   | scaffold10.1  | +      | 10,697,574 | 10,697,669 | gp1b  | middle           |
| 9           | ipu-let-7a_R+4             | TGAGGTAGTAGGTTGTATAGTTTT | scaffold63.1  | +      | 1,022,579  | 1,022,675  | gp1b  | middle           |
| 10          | gga-let-7j-3p              | CTATACAGTCTATTGCCTTCCT   | scaffold63.1  | +      | 1,022,579  | 1,022,675  | gp1b  | middle           |
| 11          | dre-let-7a_L+1             | CTGAGGTAGTAGGTTGTATAGTT  | scaffold190.1 | +      | 666,164    | 666,242    | gp1b  | middle           |
| 12          | mml-let-7a-2-3p_1ss8GA     | CTGTACAACCTCCTAGCTTTCC   | scaffold190.1 | +      | 666,164    | 666,242    | gp1b  | middle           |
| 13          | fru-miR-7_R+3              | TGGAAGACTAGTGATTTTGTGTT  | scaffold95.1  | +      | 235,572    | 235,662    | gp1b  | middle           |
| 14          | tgu-miR-7-1-3p_R+1_1ss21TA | CAACAAATCACAGTCTGCCAAA   | scaffold95.1  | +      | 235,572    | 235,662    | gp1b  | middle           |
| 15          | hsa-let-7b-3p_1ss22CT      | CTATACAACCTACTGCCTTCCT   | scaffold6.1   | +      | 2,425,979  | 2,426,072  | gp1b  | middle           |
| 16          | ipu-let-7e                 | TGAGGTAGTAGATTGAATAGTT   | scaffold41.1  | -      | 2,315,483  | 2,315,579  | gp1b  | high             |
| 17          | ipu-let-7e-2-p3            | CTATACAATCTACTGTCTTTCT   | scaffold63.1  | +      | 1,022,293  | 1,022,392  | gp1b  | middle           |
| 18          | dre-let-7g                 | TGAGGTAGTAGTTTGTATAGTT   | scaffold179.1 | +      | 78,126     | 78,211     | gp1b  | high             |
| 19          | tmi-let-7j_1ss11TG         | TGAGGTAGTTGTTTGTACAGTT   | scaffold60.1  | -      | 2,345,744  | 2,345,826  | gp1b  | high             |
| 20          | tmi-let-7j-p3_1ss22CT      | CTGTACAAGTGACTGCCTTGCT   | scaffold60.1  | -      | 2,345,744  | 2,345,826  | gp1b  | middle           |
| 21          | ipu-let-7f                 | TGAGGTAGTAGATTGTATAGTT   | scaffold61.1  | -      | 1,455,204  | 1,455,289  | gp1b  | high             |
| 22          | hsa-let-7f-1-3p_1ss22CT    | CTATACAATCTATTGCCTTCCT   | scaffold61.1  | -      | 1,455,204  | 1,455,289  | gp1b  | middle           |
| 23          | ipu-let-7a_R+1             | TGAGGTAGTAGGTTGTATAGTTG  | scaffold10.1  | -      | 4,237,574  | 4,237,669  | gp1b  | middle           |
| 24          | dre-let-7d-5p_R+2          | TGAGGTAGTTGGTTGTATGGTTTT | scaffold69.1  | +      | 273,081    | 273,156    | gp1b  | middle           |
| 25          | hsa-let-7f-2-3p_1ss22CT    | CTATACAGTCTACTGTCTTTCT   | scaffold100.1 | -      | 494,766    | 494,855    | gp1b  | middle           |
| 26          | ipu-let-7h                 | TGAGGTAGTAAGTTGTGTTGTT   | scaffold100.1 | -      | 494,487    | 494,582    | gp1b  | high             |

|    |                              |                           |                 |           |           |      |        |
|----|------------------------------|---------------------------|-----------------|-----------|-----------|------|--------|
| 27 | tmi-let-7h-p3                | CTATACAACCTACTGCCTTCCT    | scaffold100.1 - | 494,487   | 494,582   | gp1b | middle |
| 28 | dre-let-7a-1-p3_1ss5AT       | CTATTCAACCTACTGTCTTTCT    | scaffold61.1 -  | 1,455,400 | 1,455,489 | gp1b | middle |
| 29 | dre-miR-9-3p_R+1             | TAAAGCTAGATAACCGAAAGTA    | scaffold170.1 + | 603,112   | 603,215   | gp1b | middle |
| 30 | dre-miR-9-4-3p               | TAAAGCTAGAGAACCGAATGTA    | scaffold3.1 +   | 7,442,086 | 7,442,181 | gp1b | middle |
| 31 | tmi-miR-10c                  | TACCCTGTAGATCCGGATTTGT    | scaffold27.1 -  | 608,983   | 609,084   | gp1b | middle |
| 32 | tmi-mir-10c-p3               | CAAATTCGCTTCTAGGGGAGT     | scaffold27.1 -  | 608,983   | 609,084   | gp1b | middle |
| 33 | dre-miR-10b-5p_L+1R-1        | GTACCCTGTAGAACCGAATTTGT   | scaffold63.1 +  | 393,026   | 393,111   | gp1b | middle |
| 34 | dre-miR-10b-2-3p             | CAAATACGTCTCTACAGGAAT     | scaffold63.1 +  | 393,026   | 393,111   | gp1b | middle |
| 35 | ola-mir-10d-p3               | CAGATTGGGTTCTAGGGGAGTC    | scaffold91.1 +  | 738,762   | 738,867   | gp1b | middle |
| 36 | tmi-miR-15a_R-1              | TAGCAGCACGGAATGGTTTGT     | scaffold24.1 +  | 3,010,360 | 3,010,426 | gp1b | high   |
| 37 | tmi-miR-15b_R-1_1ss21TA      | TAGCAGCGCATCATGGTTTGA     | scaffold12.1 +  | 7,352,918 | 7,353,007 | gp1b | high   |
| 38 | tmi-mir-15b-p3_1ss4AG        | TGCGAACCATAATTTGCTGCTT    | scaffold12.1 +  | 7,352,918 | 7,353,007 | gp1b | middle |
| 39 | ola-miR-16                   | TAGCAGCACGTAAATATTGGC     | scaffold12.1 +  | 7,353,138 | 7,353,232 | gp1b | high   |
| 40 | ola-mir-16-p3_1ss10AG        | CCCAATATTGGCAGTGCTGCTT    | scaffold12.1 +  | 7,353,138 | 7,353,232 | gp1b | middle |
| 41 | tmi-miR-16_R-1               | TAGCAGCACGTAAATATTGGA     | scaffold24.1 +  | 3,010,583 | 3,010,654 | gp1b | high   |
| 42 | tmi-mir-16-p3_1ss5GA         | TCCAATATTGATCGTGCTGCTG    | scaffold24.1 +  | 3,010,583 | 3,010,654 | gp1b | middle |
| 43 | ola-miR-17_R+4               | CAAAGTGCTTACAGTGCAGGTA    | scaffold50.1 -  | 2,083,359 | 2,083,449 | gp1b | middle |
| 44 | ola-mir-17-p3                | CTGCAGTGAAGGCACTTTCAGC    | scaffold50.1 -  | 2,083,359 | 2,083,449 | gp1b | middle |
| 45 | ipu-miR-17b_L-1_2ss19CA20AC  | CTGCAGTGGAGGCACTTACAGC    | scaffold145.1 + | 643,746   | 643,823   | gp1b | middle |
| 46 | dre-miR-18b-5p_1ss11TC       | TAAGGTGCATCTAGTGCAGATA    | scaffold145.1 + | 643,869   | 643,960   | gp1b | middle |
| 47 | dre-miR-18b-3p_L+1R-2_1ss15C | ACTGCCCTAAGTGCTCCTTCT     | scaffold145.1 + | 643,869   | 643,960   | gp1b | middle |
| 48 | ipu-miR-19b                  | AGTTTTGCTGGTTTGCATTCAGC   | scaffold145.1 + | 644,377   | 644,438   | gp1b | middle |
| 49 | ipu-mir-19b-p3               | TGTGCAAATCCATGCAAAACTG    | scaffold145.1 + | 644,377   | 644,438   | gp1b | middle |
| 50 | rno-miR-19a-3p               | TGTGCAAATCTATGCAAAACTGA   | scaffold50.1 -  | 2,082,732 | 2,082,805 | gp1b | middle |
| 51 | dre-miR-19a-5p_L+1R-1        | GCTAGTTTTGCATAGTTGCACT    | scaffold145.1 + | 644,014   | 644,096   | gp1b | middle |
| 52 | ola-mir-19d-p5               | AGCTTTGCAGGGTGGGCAGTCAGC  | scaffold46.1 +  | 1,401,209 | 1,401,298 | gp1b | middle |
| 53 | ola-miR-19d                  | TGTGCAAACCCATGCAAAACTG    | scaffold46.1 +  | 1,401,209 | 1,401,298 | gp1b | middle |
| 54 | ola-mir-19b-1-p5             | AGTTTTGCTGGTTTGCCTTCAGC   | scaffold50.1 -  | 2,082,427 | 2,082,515 | gp1b | middle |
| 55 | tmi-miR-20                   | TAAAGTGCTTATAGTGCAGGTAG   | scaffold50.1 -  | 2,082,558 | 2,082,634 | gp1b | high   |
| 56 | hhi-miR-21_L+3               | ATCTAGCTTATCAGACTGGTGTTCG | scaffold18.1 +  | 3,108,771 | 3,108,855 | gp1b | middle |
| 57 | hhi-mir-21-p3_1ss8AG         | CAACACTGGTTTGTAAAGCTGGC   | scaffold18.1 +  | 3,108,771 | 3,108,855 | gp1b | middle |
| 58 | ola-miR-22_R+1               | AAGCTGCCAGCTGAAGAAGTGC    | scaffold74.1 -  | 153,368   | 153,457   | gp1b | middle |

|    |                              |                          |              |   |           |           |      |        |
|----|------------------------------|--------------------------|--------------|---|-----------|-----------|------|--------|
| 59 | tmi-mir-22b-p5               | CGTTCTTCACTGGCTAGCTTTA   | scaffold94.1 | + | 1,257,066 | 1,257,151 | gp1b | middle |
| 60 | tmi-miR-22b                  | AAGCTGCCAGTTGAAGAGCTGT   | scaffold94.1 | + | 1,257,066 | 1,257,151 | gp1b | middle |
| 61 | dre-miR-23a-3-5p             | GGATTCCTGGCAGAGTGATTT    | scaffold44.1 | - | 1,750,784 | 1,750,859 | gp1b | middle |
| 62 | dre-miR-23a-3p_R-1           | ATCACATTGCCAGGGATTTCC    | scaffold44.1 | - | 1,750,784 | 1,750,859 | gp1b | high   |
| 63 | dre-mir-23a-1-p5_1ss15CG     | AGGGTTCCTGGCACGGTGATTT   | scaffold22.1 | - | 245,675   | 245,762   | gp1b | middle |
| 64 | hhi-mir-23a-p5               | GGAATTCCTGGCAGGGTGATTT   | 328,521,904  | + | 307       | 401       | gp1b | middle |
| 65 | bta-miR-23b-5p_1ss12AG       | GGGTTCCTGGCGTGCTGATTT    | scaffold95.1 | + | 1,759,104 | 1,759,209 | gp1b | middle |
| 66 | ipu-miR-23b                  | ATCACATTGCCAGGGATTACC    | scaffold95.1 | + | 1,759,104 | 1,759,209 | gp1b | middle |
| 67 | dre-mir-24-5-p5              | TGCCTGCTGTGCTGATAATCAGT  | scaffold90.1 | + | 688,364   | 688,447   | gp1b | middle |
| 68 | dre-miR-24_R+1               | TGGCTCAGTTCAGCAGGAACAGT  | scaffold90.1 | + | 688,364   | 688,447   | gp1b | high   |
| 69 | dre-miR-25-5p_2ss18GA19CT    | AGGCGGAGACTTGGGCAATTGCC  | scaffold46.1 | + | 1,401,404 | 1,401,490 | gp1b | middle |
| 70 | dre-miR-25-3p                | CATTGCACTTGTCTCGGTCTGA   | scaffold46.1 | + | 1,401,404 | 1,401,490 | gp1b | high   |
| 71 | hhi-miR-26_R+1               | TTCAAGTAATCCAGGATAGGCT   | scaffold23.1 | + | 1,249,072 | 1,249,160 | gp1b | high   |
| 72 | hhi-mir-26-2-p3              | CCTATTCAGGACGACTTGGTTC   | scaffold23.1 | + | 1,249,072 | 1,249,160 | gp1b | middle |
| 73 | ola-mir-26-2-p3              | CCTATTCATGATTACTTGCCT    | scaffold32.1 | - | 5,486,548 | 5,486,633 | gp1b | middle |
| 74 | ola-mir-26-1-p3              | CCTATTCATTGATTACTTGTTC   | scaffold62.1 | - | 2,247,962 | 2,248,043 | gp1b | middle |
| 75 | hhi-mir-26-1-p3              | CCTATGCTTGATTACTTGCCT    | scaffold35.1 | + | 6,605,496 | 6,605,585 | gp1b | middle |
| 76 | mmu-miR-27b-5p               | AGAGCTTAGCTGATTGGTGAAC   | scaffold95.1 | + | 1,759,465 | 1,759,539 | gp1b | middle |
| 77 | ipu-miR-27b                  | TTCACAGTGGCTAAGTTCTGC    | scaffold95.1 | + | 1,759,465 | 1,759,539 | gp1b | high   |
| 78 | ola-miR-27b-5p               | AGAGCTTAGCTAATTGGTGAGC   | scaffold22.1 | - | 245,038   | 245,137   | gp1b | middle |
| 79 | ola-miR-27d-3p_R+3           | TTCACAGTGGCTAAGTTTCAGT   | scaffold22.1 | - | 245,038   | 245,137   | gp1b | high   |
| 80 | tmi-mir-27c-p5_1ss9AG        | CAGGACTTGACCCACATGTGAACA | 328,521,904  | + | 529       | 602       | gp1b | middle |
| 81 | tmi-miR-27c                  | TTCACAGTGGTTAAGTTCTGC    | 328,521,904  | + | 529       | 602       | gp1b | high   |
| 82 | ola-miR-27a_R+1              | TTCACAGTGGCTAAGTTCCGC    | scaffold44.1 | - | 1,749,981 | 1,750,063 | gp1b | high   |
| 83 | hsa-miR-29b-1-5p_2ss11TG19TC | GCTGGTTTCAGATGGTGGCTTAGA | scaffold62.1 | + | 883,204   | 883,297   | gp1b | middle |
| 84 | ola-miR-29b                  | TAGCACCATTTGAAATCAGTGT   | scaffold62.1 | + | 883,204   | 883,297   | gp1b | middle |
| 85 | mdo-miR-29a-1-5p_L+1_1ss3TC  | ACCGATTTCTTTTGGTGTTCAGA  | scaffold62.1 | + | 883,445   | 883,529   | gp1b | middle |
| 86 | ola-miR-29c_R+4              | TAGCACCATTTGAAATCGGTTA   | scaffold62.1 | + | 883,445   | 883,529   | gp1b | middle |
| 87 | cfa-miR-30d_R-1              | TGTAAACATCCCCGACTGGAAGC  | scaffold9.1  | + | 3,842,751 | 3,842,812 | gp1b | high   |
| 88 | dre-miR-30e-5p_R+2           | TGTAAACATCCTTGACTGGAAGCT | scaffold7.1  | - | 4,318,671 | 4,318,765 | gp1b | high   |
| 89 | dre-miR-30e-3p               | CTTTCAGTCGGATGTTTGCAGC   | scaffold7.1  | - | 4,318,671 | 4,318,765 | gp1b | middle |
| 90 | tmi-miR-30b                  | TGTAAACATCCTACACTCAGCT   | scaffold9.1  | + | 3,842,972 | 3,843,046 | gp1b | high   |

|     |                              |                          |               |   |            |            |      |        |
|-----|------------------------------|--------------------------|---------------|---|------------|------------|------|--------|
| 91  | tmi-mir-30b-p3_1ss22AT       | TGAGAGAAGGTTGTTTACTTGT   | scaffold9.1   | + | 3,842,972  | 3,843,046  | gp1b | middle |
| 92  | mdo-miR-30c-5p_R+1           | TGTAAACATCCTACACTCTCAGCT | scaffold9.1   | + | 10,248,987 | 10,249,043 | gp1b | high   |
| 93  | xtr-miR-33a_R+1              | GTGCATTGTAGTTGCATTGC     | scaffold92.1  | + | 1,994,279  | 1,994,367  | gp1b | middle |
| 94  | dre-miR-34a                  | TGGCAGTGTCTTAGCTGGTTGT   | scaffold19.1  | - | 7,523,852  | 7,523,937  | gp1b | middle |
| 95  | dre-mir-34a-p3_1ss5TA        | TGTGAGGAGTGAGAACGAAGC    | scaffold19.1  | - | 7,523,852  | 7,523,937  | gp1b | middle |
| 96  | tmi-miR-92                   | TATTGCACTTGTCCCGGCCTGT   | scaffold145.1 | + | 644,564    | 644,626    | gp1b | high   |
| 97  | dre-miR-92a-5p_2ss10TG11TA   | AGGTTGGGAGAGGTAGCAATGCT  | scaffold50.1  | - | 2,082,332  | 2,082,409  | gp1b | middle |
| 98  | ipu-miR-96                   | TTTGGCACTAGCACATTTTGTCT  | scaffold84.1  | + | 6,721,303  | 6,721,397  | gp1b | middle |
| 99  | ola-mir-99-p5                | AACCCGTAGATCCGATCTTGTG   | scaffold10.1  | + | 10,697,202 | 10,697,290 | gp1b | high   |
| 100 | ola-miR-99_R-1               | CAAGCTCGCCTCTGTGGGTCT    | scaffold10.1  | + | 10,697,202 | 10,697,290 | gp1b | middle |
| 101 | dre-miR-100-5p               | AACCCGTAGATCCGAACCTTGTG  | scaffold10.1  | - | 4,238,207  | 4,238,304  | gp1b | high   |
| 102 | dre-miR-100-2-3p_1ss10GA     | CAAGCTCGTATCTATAGGTATG   | scaffold10.1  | - | 4,238,207  | 4,238,304  | gp1b | middle |
| 103 | ola-miR-101b-5p              | TCAGTTATCATGGTACCGGTGCT  | scaffold45.1  | + | 2,136,392  | 2,136,483  | gp1b | middle |
| 104 | ipu-miR-101b_R+1_1ss10AG     | TACAGTACTGTGATAACTGAAG   | scaffold45.1  | + | 2,136,392  | 2,136,483  | gp1b | middle |
| 105 | ola-miR-101a-5p              | TCAGTTATCACAGTGCTGATGC   | scaffold29.1  | + | 2,136,133  | 2,136,237  | gp1b | middle |
| 106 | ola-miR-103_R+2              | AGCAGCATTGTACAGGGCTATGA  | scaffold46.1  | + | 1,686,947  | 1,687,036  | gp1b | middle |
| 107 | ipu-mir-103-1-p5             | AGCCTCTTTACGGTGCTGCCTTG  | scaffold178.1 | - | 455,699    | 455,764    | gp1b | middle |
| 108 | dre-miR-107a-3p_R-1          | AGCAGCATTGTACAGGGCTATC   | scaffold91.1  | + | 2,266,392  | 2,266,476  | gp1b | middle |
| 109 | ccr-miR-124a_R+2             | TCAAGGTCCGCTGTGAACACGA   | scaffold77.1  | - | 3,053,679  | 3,053,744  | gp1b | middle |
| 110 | dre-miR-125b-5p              | TCCCTGAGACCCTAACCTTGTGA  | scaffold10.1  | - | 4,232,832  | 4,232,929  | gp1b | high   |
| 111 | dre-miR-125b-2-3p_L+1_1ss15C | ACGGGTTGGGTTCTTGGGAGCT   | scaffold10.1  | - | 4,232,832  | 4,232,929  | gp1b | middle |
| 112 | ola-mir-125b-2-p3            | ACGGGTTAGGCTCTTGGGACGC   | scaffold10.1  | + | 10,705,640 | 10,705,747 | gp1b | middle |
| 113 | dre-miR-125a                 | TCCCTGAGACCCTAACCTGTG    | scaffold30.1  | - | 628,609    | 628,693    | gp1b | high   |
| 114 | ola-miR-125a-3p_R-1          | ACAGGTGAGGTCCTCGGGAAC    | scaffold30.1  | - | 628,609    | 628,693    | gp1b | middle |
| 115 | ipu-mir-125a-2-p3            | CAGGTGAGGTCCTTGGGAAC     | scaffold69.1  | + | 277,246    | 277,306    | gp1b | middle |
| 116 | ola-mir-125c-p3_1ss8TA       | ACGGGTTAGGCTCTCGGGAGCT   | scaffold190.1 | + | 671,578    | 671,671    | gp1b | middle |
| 117 | ipu-miR-126b                 | CATTATTACTTTTGGTACGCG    | scaffold25.1  | + | 5,187,933  | 5,188,032  | gp1b | middle |
| 118 | ipu-miR-126a                 | TCGTACCGTGAGTAATAATGCA   | scaffold25.1  | + | 5,187,933  | 5,188,032  | gp1b | high   |
| 119 | tmi-mir-128-1-p5_1ss18TC     | CGGGGCCGGGACGCTGTCTGAGA  | scaffold203.1 | - | 226,615    | 226,686    | gp1b | middle |
| 120 | tmi-miR-128_R-1              | TCACAGTGAACCGGTCTCTTT    | scaffold203.1 | - | 226,615    | 226,686    | gp1b | middle |
| 121 | ola-mir-128-p5               | GGGGGCCGTTACACTGTCAGAGA  | scaffold9.1   | - | 10,037,570 | 10,037,657 | gp1b | middle |
| 122 | dre-miR-129-5p_R-1           | CTTTTTCGGTCTGGGCTTGC     | scaffold48.1  | + | 2,599,195  | 2,599,271  | gp1b | middle |

|     |                             |                         |               |   |           |           |      |        |
|-----|-----------------------------|-------------------------|---------------|---|-----------|-----------|------|--------|
| 123 | dre-miR-129-1-3p_L-1R+2     | AAGCCCTTACCCCAAAAAGTAT  | scaffold48.1  | + | 2,599,195 | 2,599,271 | gp1b | middle |
| 124 | dre-miR-129-3p              | AAGCCCTTACCCCAAAAAGCAT  | scaffold6.1   | + | 3,602,564 | 3,602,655 | gp1b | middle |
| 125 | gga-miR-130a-5p_1ss16TC     | GCCCTTTTTCTGTTGCACTACT  | scaffold45.1  | - | 1,205,380 | 1,205,483 | gp1b | middle |
| 126 | ola-miR-130c_R+3            | CAGTGCAATATTAAGGGGCAT   | scaffold45.1  | - | 1,205,380 | 1,205,483 | gp1b | middle |
| 127 | dre-miR-130c-5p             | GCCCTTTTTCTGTTGTACTACT  | scaffold2.1   | - | 9,898,806 | 9,898,887 | gp1b | middle |
| 128 | ccr-miR-132b                | ACCATGGCTGTAGACTGTTACC  | scaffold74.1  | - | 582,727   | 582,814   | gp1b | middle |
| 129 | dre-miR-132-3p              | TAACAGTCTACAGCCATGGTCG  | scaffold12.1  | - | 5,452,002 | 5,452,091 | gp1b | middle |
| 130 | dre-miR-133a-5p             | AGCTGGTAAAATGGAACCAAAT  | scaffold37.1  | - | 1,904,021 | 1,904,118 | gp1b | middle |
| 131 | dre-miR-133a-3p_L-1R+1      | TTGGTCCCCTTCAACCAGCTGT  | scaffold37.1  | - | 1,904,021 | 1,904,118 | gp1b | high   |
| 132 | tni-miR-135b_R+1            | TATGGCTTTTTATTCTATCTGA  | scaffold19.1  | + | 3,902,521 | 3,902,605 | gp1b | middle |
| 133 | ola-miR-135b_R+3            | TATGGCTTTTTATTCTACGTG   | scaffold84.1  | + | 5,812,433 | 5,812,522 | gp1b | middle |
| 134 | dre-miR-135c                | TATGGCTTCTATTCTATGTG    | scaffold61.1  | - | 427,876   | 427,966   | gp1b | middle |
| 135 | dre-miR-137-3p_L-1R+1       | TATTGCTTAAGAATACGCGTAG  | scaffold117.1 | + | 580,472   | 580,559   | gp1b | middle |
| 136 | tni-miR-137_R-1             | TTATTGCTTGAGAATACGCGT   | scaffold1.1   | - | 101,140   | 101,209   | gp1b | middle |
| 137 | dre-miR-138-5p_R+1          | AGCTGGTGTGTGAATCAGGCCG  | scaffold93.1  | - | 681,018   | 681,110   | gp1b | middle |
| 138 | ola-miR-139_R+2             | TCTACAGTGCATGTGTCTCCAGT | scaffold18.1  | - | 5,201,436 | 5,201,528 | gp1b | middle |
| 139 | ipu-miR-141_R+1             | TAACACTGTCTGGTAACGATGT  | scaffold19.1  | + | 2,364,687 | 2,364,778 | gp1b | high   |
| 140 | tni-mir-200a-p5_1ss11GT     | CATCTTACCTTACAGTGCTGGA  | scaffold19.1  | + | 2,364,687 | 2,364,778 | gp1b | middle |
| 141 | dre-miR-142a-5p             | CATAAAGTAGAAAGCACTACT   | scaffold12.1  | - | 4,710,550 | 4,710,645 | gp1b | middle |
| 142 | dre-miR-142a-3p_L-1         | GTAGTGTTTCTACTTTATGGA   | scaffold12.1  | - | 4,710,550 | 4,710,645 | gp1b | middle |
| 143 | mmu-miR-143-5p_R+2          | GGTGCAGTGCTGCATCTCTGGTC | scaffold53.12 | - | 599,891   | 599,948   | gp1b | middle |
| 144 | ipu-miR-143                 | TGAGATGAAGCACTGTAGCTC   | scaffold53.12 | - | 599,891   | 599,948   | gp1b | middle |
| 145 | ipu-miR-145                 | GTCCAGTTTTCCCAGGAATCCCT | scaffold53.12 | - | 598,659   | 598,721   | gp1b | high   |
| 146 | ipu-mir-145-p3              | GGATTCCTGGAAATACTGTTCT  | scaffold53.12 | - | 598,659   | 598,721   | gp1b | middle |
| 147 | hhi-miR-147b_L-3R+1_1ss12CA | TGCGGAAAAGCTTCTGCTCCA   | scaffold80.1  | + | 459,129   | 459,211   | gp1b | middle |
| 148 | ola-mir-148-p5              | AAGTTCTGTGATACACTCAGACT | scaffold50.1  | + | 1,403,375 | 1,403,468 | gp1b | middle |
| 149 | dre-miR-148_R-1             | TCAGTGCATTACAGAACTTTG   | scaffold50.1  | + | 1,403,375 | 1,403,468 | gp1b | middle |
| 150 | tni-mir-152-p5              | AAGTTCTGTGATACACTCTGACT | scaffold27.1  | - | 366,161   | 366,232   | gp1b | middle |
| 151 | tni-miR-152                 | TCAGTGCATAACAGAACTTTGT  | scaffold27.1  | - | 366,161   | 366,232   | gp1b | middle |
| 152 | gga-miR-155_R+1             | TTAATGCTAATCGTGATAGGGGT | scaffold145.1 | + | 624,805   | 624,862   | gp1b | middle |
| 153 | mmu-miR-181b-5p             | AACATTCATTGCTGTCGGTGGGT | scaffold32.1  | - | 353,174   | 353,256   | gp1b | middle |
| 154 | oan-miR-181a-5p             | AACATTCACGCTGTCGGTGAGT  | scaffold53.11 | + | 1,278,407 | 1,278,467 | gp1b | high   |

|     |                              |                          |               |   |           |           |      |        |
|-----|------------------------------|--------------------------|---------------|---|-----------|-----------|------|--------|
| 155 | ipu-mir-181a-3-p3            | ACCATCGACCGTTGACTGTGCC   | scaffold32.1  | - | 353,392   | 353,456   | gp1b | middle |
| 156 | mdo-miR-181b-2-3p_L+1_1ss21A | CTCACTGATCAATGAATGCAGA   | scaffold53.11 | + | 1,278,627 | 1,278,733 | gp1b | middle |
| 157 | tni-miR-181a-3p_1ss20AT      | ACCATCGACCGTTGATTGTTCC   | scaffold55.1  | + | 1,154,664 | 1,154,736 | gp1b | middle |
| 158 | ola-miR-183-5p_L+1R+3        | TATGGCACTGGTAGAATTCACTG  | scaffold48.1  | - | 1,418,024 | 1,418,127 | gp1b | middle |
| 159 | ola-miR-184-5p_L-1R+2        | CCTTATCACTTTTCCAGCCCAGC  | scaffold52.1  | + | 3,182,499 | 3,182,596 | gp1b | middle |
| 160 | dre-miR-184                  | TGGACGGAGAACTGATAAGGGC   | scaffold52.1  | + | 3,182,499 | 3,182,596 | gp1b | middle |
| 161 | ola-miR-187_R+4              | GGCTGCAACACAGGACATGGGT   | scaffold9.1   | - | 9,650,883 | 9,650,979 | gp1b | middle |
| 162 | dre-miR-187_R+3              | TCGTGTCTTGTGTTGCAGCCAGT  | scaffold9.1   | - | 9,650,883 | 9,650,979 | gp1b | middle |
| 163 | dre-miR-190a_R+1             | TGATATGTTTGATATATTAGGTT  | scaffold52.1  | + | 2,856,315 | 2,856,429 | gp1b | middle |
| 164 | hsa-miR-190a-3p_L+1          | ACTATATATCAAACATATTCCT   | scaffold52.1  | + | 2,856,315 | 2,856,429 | gp1b | middle |
| 165 | ipu-miR-190b                 | TGATATGTTTGATATTCGGTTG   | scaffold31.1  | + | 4,133,970 | 4,134,034 | gp1b | middle |
| 166 | ipu-miR-192                  | ATGACCTATGAATTGACAGCC    | scaffold10.1  | + | 7,345,600 | 7,345,672 | gp1b | middle |
| 167 | ipu-mir-192-p3               | CCTGTCAGTTCTGTAGGCCACT   | scaffold10.1  | + | 7,345,600 | 7,345,672 | gp1b | middle |
| 168 | tni-mir-193-p5               | TGGGTCTTTGCGGGCAAGGTGA   | scaffold1.1   | - | 333,232   | 333,317   | gp1b | middle |
| 169 | tni-miR-193_R-2              | AACTGGCCTACAAAGTCCCA     | scaffold1.1   | - | 333,232   | 333,317   | gp1b | middle |
| 170 | hhi-miR-196_R+1              | TAGGTAGTCTCATGTTGTTGGGT  | scaffold30.1  | - | 1,431,710 | 1,431,796 | gp1b | middle |
| 171 | hhi-mir-196-p3               | CCACAACACGAAACTGCCTTGA   | scaffold30.1  | - | 1,431,710 | 1,431,796 | gp1b | middle |
| 172 | dre-miR-196a-5p              | TAGGTAGTTTCATGTTGTTGGG   | scaffold9.1   | + | 7,809,835 | 7,809,910 | gp1b | middle |
| 173 | dre-miR-196a-3p_L+1R-1_1ss9G | TCTGCAACATGAAACTGTCTTA   | scaffold9.1   | + | 7,809,835 | 7,809,910 | gp1b | middle |
| 174 | dre-miR-196b                 | TAGGTAGTTTCAAGTTGTTGGG   | scaffold27.1  | - | 711,920   | 711,988   | gp1b | middle |
| 175 | dre-mir-196b-p3              | ACAGGAACCTGAAACTGCCTGA   | scaffold27.1  | - | 711,920   | 711,988   | gp1b | middle |
| 176 | dre-miR-199-5p_R-1_1ss17CG   | CCCAGTGTTTCAGACTAGCTGTT  | scaffold82.1  | + | 752,238   | 752,332   | gp1b | middle |
| 177 | dre-miR-199-3-3p_L+1_1ss11CT | AACAGTAGTCTGCACATTGGTT   | scaffold82.1  | + | 752,238   | 752,332   | gp1b | middle |
| 178 | dre-miR-199-5p_L+2R-2        | ATCCCAGTGTTTCAGACTACCTGT | scaffold3.1   | + | 6,341,316 | 6,341,405 | gp1b | middle |
| 179 | tni-mir-200b-p5              | CATCTTACGAGGCAGCATTGGA   | scaffold19.1  | + | 2,364,523 | 2,364,597 | gp1b | middle |
| 180 | tni-miR-200b                 | TAATACTGCCTGGTAATGATGA   | scaffold19.1  | + | 2,364,523 | 2,364,597 | gp1b | high   |
| 181 | dre-miR-202-5p_R-1           | TTCCTATGCATATACTCTTT     | scaffold7.1   | + | 2,489,674 | 2,489,747 | gp1b | middle |
| 182 | dre-miR-204-5p               | TTCCCTTTGTCATCCTATGCCT   | scaffold2.1   | - | 1,829,752 | 1,829,838 | gp1b | high   |
| 183 | tni-mir-204a-p3              | GCAGGGACAGCAAAGGGATGCT   | scaffold52.1  | - | 2,330,441 | 2,330,533 | gp1b | middle |
| 184 | tni-miR-205                  | TCCTTCATTCCACCGGAGTCTG   | scaffold62.1  | - | 578,650   | 578,729   | gp1b | high   |
| 185 | ola-miR-205_L-1R+1_1ss20TA   | GATTTCACTGGTGTGAAGAGTA   | scaffold62.1  | - | 578,650   | 578,729   | gp1b | middle |
| 186 | dre-miR-210-5p               | AGCCACTGACTAACGCACATTG   | scaffold57.1  | - | 2,639,115 | 2,639,211 | gp1b | middle |

|     |                              |                           |               |   |           |           |      |        |
|-----|------------------------------|---------------------------|---------------|---|-----------|-----------|------|--------|
| 187 | dre-miR-210-3p_R+1           | CTGTGCGTGTGACAGCGGCTAAT   | scaffold57.1  | - | 2,639,115 | 2,639,211 | gp1b | middle |
| 188 | ipu-miR-212                  | ACCTTGGCTCTAGACTGCTTACT   | scaffold74.1  | + | 582,372   | 582,438   | gp1b | middle |
| 189 | cgr-miR-214-5p               | TGCCTGTCTACACTTGCTGTGC    | scaffold3.1   | + | 6,343,701 | 6,343,797 | gp1b | middle |
| 190 | ipu-miR-214_1ss22AT          | ACAGCAGGCACAGACAGGCAGT    | scaffold3.1   | + | 6,343,701 | 6,343,797 | gp1b | high   |
| 191 | tni-miR-216b                 | TAATCTCTGCAGGCAACTGTGA    | scaffold16.1  | - | 2,445,520 | 2,445,586 | gp1b | middle |
| 192 | tni-miR-216a                 | AAATCTCAGCTGGCAACTGTGA    | scaffold16.1  | - | 2,444,783 | 2,444,855 | gp1b | middle |
| 193 | tni-miR-217_R+1              | TACTGCATCAGGAACTGATTGGC   | scaffold16.1  | - | 2,444,199 | 2,444,293 | gp1b | middle |
| 194 | ola-miR-218b_R+2             | TTGTGCTTGATCTAACCATGTG    | scaffold185.1 | - | 18,356    | 18,452    | gp1b | middle |
| 195 | ipu-miR-218a                 | TTGTGCTTGATCTAACCATG      | scaffold45.1  | - | 1,139,168 | 1,139,247 | gp1b | middle |
| 196 | ipu-mir-221-1-p5             | ACCTGGCATAACAATGTAGATTT   | scaffold129.1 | + | 462,014   | 462,082   | gp1b | middle |
| 197 | xtr-miR-222_R-1              | AGCTACATCTGGCTACTGGGTCT   | scaffold131.1 | - | 542,752   | 542,813   | gp1b | high   |
| 198 | ipu-miR-222a_1ss11TG         | TGCTCAGTAGGCAGTGTAGATC    | scaffold129.1 | + | 461,567   | 461,630   | gp1b | middle |
| 199 | ola-mir-223-p5_1ss18GA       | TGTATTTGACAAGCTGAATTGG    | scaffold10.1  | - | 5,466,813 | 5,466,909 | gp1b | middle |
| 200 | ola-miR-223_R+2              | TGTCAGTTTGTCAAATACCCCA    | scaffold10.1  | - | 5,466,813 | 5,466,909 | gp1b | middle |
| 201 | dre-miR-301c-5p_R+1_2ss4CT9C | GCTTTGACAATGTTGCACTACT    | scaffold45.1  | - | 1,204,926 | 1,205,020 | gp1b | middle |
| 202 | dre-miR-301c-3p_R+1          | CAGTGCAATAGTATTGTCAATAGC  | scaffold45.1  | - | 1,204,926 | 1,205,020 | gp1b | middle |
| 203 | ipu-miR-301a                 | CAGTGCAATAGTATTGTCAAAGC   | scaffold210.1 | - | 152,441   | 152,539   | gp1b | middle |
| 204 | ipu-mir-338-3-p5             | AACAATATCCTGGTGCTGCCTGAG' | scaffold123.1 | + | 2,279,197 | 2,279,255 | gp1b | middle |
| 205 | ipu-miR-338_R-1              | TCCAGCATCAGTGATTTTGT      | scaffold123.1 | + | 2,279,197 | 2,279,255 | gp1b | middle |
| 206 | tni-mir-338-p5               | AACAACATCCTGGTGCTGCCTGAG' | scaffold82.1  | - | 1,440,088 | 1,440,163 | gp1b | middle |
| 207 | ipu-miR-365_R+3              | AGGGACTTTTAGGGGCAGCTGTG   | scaffold1.1   | - | 330,505   | 330,602   | gp1b | middle |
| 208 | dre-miR-365                  | TAATGCCCTAATAAATCCTTAT    | scaffold1.1   | - | 330,505   | 330,602   | gp1b | high   |
| 209 | tni-miR-375_R-1              | TTTGTTCGTTTCGGCTCGCGTT    | scaffold8.1   | - | 5,438,710 | 5,438,781 | gp1b | high   |
| 210 | dre-miR-429a                 | TAATACTGTCTGGTAATGCCGT    | scaffold19.1  | + | 2,366,230 | 2,366,316 | gp1b | middle |
| 211 | ccr-mir-454b-p5              | ACCCTATCAATATTGCCTCTGCT   | scaffold2.1   | - | 9,892,572 | 9,892,642 | gp1b | middle |
| 212 | ccr-miR-454b_R+2             | TAGTGCAATATTGCTTATAGGGT   | scaffold2.1   | - | 9,892,572 | 9,892,642 | gp1b | middle |
| 213 | dre-miR-455-5p               | TATGTGCCCTTGGACTACATCG    | scaffold147.1 | + | 105,384   | 105,471   | gp1b | middle |
| 214 | dre-miR-455-3p_L-1           | TGCAGTCCATGGGCATATACAC    | scaffold147.1 | + | 105,384   | 105,471   | gp1b | high   |
| 215 | ola-miR-460-5p_R+1           | CCTGCATTGTACACACTGTGC     | scaffold44.1  | - | 1,182,061 | 1,182,145 | gp1b | middle |
| 216 | ola-miR-460-3p_L+1           | CACAGCGCATAACAATGTGGATG   | scaffold44.1  | - | 1,182,061 | 1,182,145 | gp1b | middle |
| 217 | ola-miR-462_L-1R+5           | TAACGGAACCCATAATGCAGCTG   | scaffold19.1  | + | 3,953,874 | 3,953,941 | gp1b | middle |
| 218 | ola-mir-462-p3_1ss12GC       | GCTGGTTATGGCGTCCGTTTCC    | scaffold19.1  | + | 3,953,874 | 3,953,941 | gp1b | middle |

|     |                         |                          |               |   |            |            |      |        |
|-----|-------------------------|--------------------------|---------------|---|------------|------------|------|--------|
| 219 | gga-miR-489-5p          | TGGTCGTATGTATGACGTCATT   | scaffold9.1   | + | 8,711,846  | 8,711,944  | gp1b | middle |
| 220 | dre-miR-489_L-1         | GTGACATCATATGTACGGCTGC   | scaffold9.1   | + | 8,711,846  | 8,711,944  | gp1b | middle |
| 221 | ipu-miR-499             | TTAAGACTTGCAGTGATGTTT    | scaffold11.1  | + | 2,482,179  | 2,482,270  | gp1b | high   |
| 222 | ola-miR-499_R+1         | AACATCACTTTAAGTCTGTGCT   | scaffold11.1  | + | 2,482,179  | 2,482,270  | gp1b | middle |
| 223 | ccr-mir-722-p5          | TTTGAAACGTTTTAGCCAAAA    | scaffold82.1  | + | 923,657    | 923,750    | gp1b | middle |
| 224 | dre-miR-722_L-2         | TTTTGCAGAAACGTTTCAGATT   | scaffold82.1  | + | 923,657    | 923,750    | gp1b | middle |
| 225 | dre-miR-724_L-1         | TAAAGGGAATTTGCGACTGTT    | scaffold56.1  | - | 2,792,183  | 2,792,267  | gp1b | middle |
| 226 | dre-miR-727-5p_1ss11AG  | TCAGTCTTCAGTTCCTCCCAGC   | scaffold32.1  | + | 4,670,644  | 4,670,737  | gp1b | middle |
| 227 | dre-miR-727-3p_1ss22AC  | GTTGAGGCGAGTTGAAGACTTC   | scaffold32.1  | + | 4,670,644  | 4,670,737  | gp1b | middle |
| 228 | hhi-mir-728-p5          | AAATGTAGTAGACTTTAAGTATAC | scaffold58.1  | + | 3,303,018  | 3,303,099  | gp1b | middle |
| 229 | hhi-miR-728_R+1         | ATACTAAGTACACTACGTTTAT   | scaffold58.1  | + | 3,303,018  | 3,303,099  | gp1b | middle |
| 230 | hhi-mir-737-p5_1ss2TG   | GGTTTTTTTAGGTTTTGATTTTT  | scaffold151.1 | - | 2,706,049  | 2,706,118  | gp1b | middle |
| 231 | ssc-mir-1285-p5_1ss23CA | GTGGGATCGCGCCTGTGAATAGAC | scaffold14.1  | - | 4,803,175  | 4,803,249  | gp1b | middle |
| 232 | dre-miR-1306_R-1        | CCACCTCCCCTGCAAACGTCC    | scaffold2.1   | - | 6,610,229  | 6,610,345  | gp1b | middle |
| 233 | ipu-miR-1388_R-1        | ATCTCAGGTTTCGTCAGCCCATG  | scaffold33.1  | - | 4,635,895  | 4,635,953  | gp1b | middle |
| 234 | hhi-miR-1788            | GGCTTGTTTTAAGTTGCCTGCG   | scaffold8.1   | - | 5,426,238  | 5,426,339  | gp1b | middle |
| 235 | hhi-mir-1788-p3         | CAGGCAGCTAAAGCAAGTCT     | scaffold8.1   | - | 5,426,238  | 5,426,339  | gp1b | middle |
| 236 | dre-miR-2187-5p_R-1     | TTAATTAGTATAGCCTGTTTT    | scaffold13.12 | + | 114,583    | 114,680    | gp1b | middle |
| 237 | bta-mir-3596-p5_1ss6CT  | GAAGGTAGTAGGTTGTATAGTT   | scaffold6.1   | - | 2,425,986  | 2,426,063  | gp1b | middle |
| 238 | dre-miR-7147            | TGTACCATGCTGGTAGCCAGT    | scaffold71.1  | + | 979,907    | 979,988    | gp1b | middle |
| 239 | hhi-mir-7641-p5         | ACGCCGATCTCGTCCGATCTCGG  | scaffold12.1  | + | 10,347,295 | 10,347,365 | gp1b | high   |
| 240 | hsa-mir-7641-2-p3       | CTCGGAAGCTAAGCAGGGTCGGGC | scaffold12.1  | + | 10,347,295 | 10,347,365 | gp1b | high   |
