# Supplementary material for: The integrated analysis of RNA-seq and microRNA-seq depicts miRNA-mRNA networks involved in Japanese flounder (Paralichthys olivaceus) albinism
Source: PubMed Central journal article supplement (PMC5544202; doi:10.1371/journal.pone.0181761), 2017-08-04
Supplement: pone.0181761.s015.pdf [file pone.0181761.s015.pdf]

**S11 Table. 75 unique miRNAs mapping to selected species (except for Japanese flounder) miRNAs/pre-miRNAs in miRbase, while only miRNA not pre-miRNAs mapping to the genome.**

| miRNA_Index | miR_name                      | miR_seq                   | genomeID      | strand | start      | end        | group | Expression level |
|-------------|-------------------------------|---------------------------|---------------|--------|------------|------------|-------|------------------|
| 1           | dre-miR-10a-5p                | TACCCTGTAGATCCGAATTTGT    | scaffold27.1  | -      | 609,033    | 609,116    | gp2   | middle           |
| 2           | dre-miR-16a_R-1               | TAGCAGCACGTAAATATTGGT     | scaffold12.1  | +      | 7,353,140  | 7,353,226  | gp2   | middle           |
| 3           | ola-mir-19a-p5_1ss17AG        | AGTTTTGCATAGTTGCGCTGC     | scaffold50.1  | -      | 2,082,762  | 2,082,848  | gp2   | middle           |
| 4           | dre-miR-20a-5p_R-1_1ss21TC    | TAAAGTGCTTATAGTGCAGGCA    | scaffold145.1 | +      | 644,216    | 644,321    | gp2   | middle           |
| 5           | dre-miR-20a-3p_2ss7GA11GA     | ACTGCAATGTAAGCACTTGAAG    | scaffold145.1 | +      | 644,216    | 644,321    | gp2   | middle           |
| 6           | dre-miR-21_1ss23CA            | TAGCTTATCAGACTGGTGTGGA    | scaffold10.1  | +      | 9,156,697  | 9,156,788  | gp2   | middle           |
| 7           | ola-miR-22_R+1_1ss11CT        | AAGCTGCCAGTTGAAGAACTGT    | scaffold12.1  | -      | 10,545,557 | 10,545,672 | gp2   | middle           |
| 8           | pma-miR-23a-5p_L-2            | GGGTTCTGGCACGGTGATTT      | scaffold22.1  | -      | 245,606    | 245,735    | gp2   | middle           |
| 9           | oan-miR-23b-3p_R+2_1ss18AT    | ATCACATTGCCAGGGATTACCACT  | scaffold22.1  | -      | 245,606    | 245,735    | gp2   | middle           |
| 10          | fru-mir-23a-3-p5              | GGATTCCTGGCAGAGTGATTTT    | scaffold44.1  | -      | 1,750,802  | 1,750,924  | gp2   | middle           |
| 11          | fru-miR-24-5p_L-1             | TGCCTACTGAACTGGTATCAGT    | scaffold44.1  | -      | 3,007,332  | 3,007,416  | gp2   | middle           |
| 12          | dre-miR-24_1ss21AC            | TGGCTCAGTTCAGCAGGAACCG    | scaffold90.1  | +      | 688,365    | 688,454    | gp2   | middle           |
| 13          | dre-miR-26b                   | TTCAAGTAATCCAGGATAGGTT    | scaffold62.1  | -      | 2,247,988  | 2,248,081  | gp2   | middle           |
| 14          | hsa-miR-26a-2-3p_R+1          | CCTATTCTTGATTACTTGTTTCT   | scaffold62.1  | -      | 2,247,988  | 2,248,081  | gp2   | middle           |
| 15          | dre-miR-26a-5p_R-1_1ss21CT    | TTCAAGTAATCCAGGATAGGTT    | scaffold32.1  | -      | 5,486,567  | 5,486,681  | gp2   | middle           |
| 16          | ola-miR-27c-3p_R+3            | TTCACAGTGGTTAAGTTCTGCCA   | 328,521,904   | +      | 503        | 635        | gp2   | middle           |
| 17          | hsa-miR-27a-3p_R+1            | TTCACAGTGGCTAAGTTCCGCG    | scaffold44.1  | -      | 1,749,934  | 1,750,014  | gp2   | middle           |
| 18          | dre-miR-27e_1ss22GA           | TTCACAGTGGCTAAGTTCAGTA    | scaffold44.1  | -      | 3,007,696  | 3,007,823  | gp2   | middle           |
| 19          | dre-miR-27d_R-1               | TTCACAGTGGCTAAGTTCTTC     | scaffold54.1  | -      | 2,162,907  | 2,163,018  | gp2   | middle           |
| 20          | hsa-miR-29b-3p_R-1_1ss10TA    | TAGCACCATATGAAATCAGTGT    | scaffold6.1   | -      | 860,709    | 860,815    | gp2   | middle           |
| 21          | ola-miR-30d-5p_R+1_1ss12CT    | TGTA AACATCCTCGACTGGAAGCT | scaffold7.1   | -      | 4,318,621  | 4,318,725  | gp2   | middle           |
| 22          | ola-miR-30a-3p_R+4            | CTTTCAGTCGGATGTTTGCAGCT   | scaffold7.1   | -      | 4,318,621  | 4,318,725  | gp2   | middle           |
| 23          | dre-miR-30a-5p_R-2_2ss10TC12C | TGTA AACATCCTCGACTGGA     | scaffold9.1   | +      | 3,842,729  | 3,842,840  | gp2   | middle           |
| 24          | dre-miR-30a-3p                | CTTTCAGTCTGATGTTTGCAGCT   | scaffold9.1   | +      | 3,842,729  | 3,842,840  | gp2   | middle           |
| 25          | ola-miR-30c_1ss21AG           | TGTA AACATCCTACACTCTCGGC  | scaffold7.1   | -      | 4,316,464  | 4,316,588  | gp2   | middle           |
| 26          | dre-miR-31_L+1                | AGGCAAGATGTTGGCATAGCTG    | scaffold38.1  | +      | 683,764    | 683,841    | gp2   | middle           |
| 27          | dre-miR-92a-5p_2ss5TG12GA     | AGGTGGGGATTAGTAGCAATGCT   | scaffold145.1 | +      | 644,543    | 644,648    | gp2   | middle           |

|    |                               |                          |               |   |            |            |     |        |
|----|-------------------------------|--------------------------|---------------|---|------------|------------|-----|--------|
| 28 | dre-miR-92a-3p_R+1            | TATTGCACTTGTCCCGGCCTGTT  | scaffold145.1 | + | 644,543    | 644,648    | gp2 | high   |
| 29 | dre-miR-93_R+1                | AAAAGTGCTGTTTGTGCAGGTAG  | scaffold46.1  | + | 1,400,949  | 1,401,037  | gp2 | middle |
| 30 | dre-miR-99_R+1_1              | AACCCGTAGATCCGATCTTGTGA  | scaffold10.1  | + | 10,697,194 | 10,697,290 | gp2 | high   |
| 31 | dre-miR-99_R+1_2              | AACCCGTAGATCCGATCTTGTGT  | scaffold190.1 | + | 665,314    | 665,374    | gp2 | high   |
| 32 | dre-miR-125b-5p_R+1           | TCCCTGAGACCCTAACTTGTGAT  | scaffold10.1  | + | 10,705,652 | 10,705,738 | gp2 | middle |
| 33 | aca-miR-129b-3p_R+2_1ss20CT   | AAGCCCTTACCCCAAAAAGTATT  | scaffold6.1   | + | 3,602,555  | 3,602,661  | gp2 | middle |
| 34 | dre-miR-133c-3p_L-1R+2_1ss10T | TTGGTCCCCTTCAACCAGCTATT  | scaffold14.1  | + | 5,270,985  | 5,271,101  | gp2 | high   |
| 35 | dre-miR-133c-3p_R+1_1ss10TC   | TTTGGTCCCCTTCAACCAGCTAT  | scaffold37.1  | - | 1,903,986  | 1,904,075  | gp2 | high   |
| 36 | dre-miR-133c-3p_2ss10TC22AT   | TTTGGTCCCCTTCAACCAGCTT   | scaffold44.1  | - | 1,458,735  | 1,458,842  | gp2 | middle |
| 37 | oan-miR-139-3p_R-1_1ss8AC     | TGGAGACCCAGCTCTGTTGGA    | scaffold18.1  | - | 5,201,399  | 5,201,492  | gp2 | middle |
| 38 | dre-miR-145-5p_L+1            | GGTCCAGTTTTTCCCAGGAATCCC | scaffold53.12 | - | 598,600    | 598,691    | gp2 | middle |
| 39 | dre-miR-145-3p_L-2R+2         | ATTCTGGAAATACTGTTCTTT    | scaffold53.12 | - | 598,600    | 598,691    | gp2 | middle |
| 40 | dre-miR-146a                  | TGAGAACTGAATTCCATAGATGG  | scaffold16.1  | - | 3,774,363  | 3,774,468  | gp2 | high   |
| 41 | ola-mir-146a-p3_1ss12CT       | ATCTATGGGCTTAGTTCTTTTG   | scaffold16.1  | - | 3,774,363  | 3,774,468  | gp2 | middle |
| 42 | ola-miR-150_R+2               | ACTCCAATCCTTGTACCAGTGT   | scaffold180.1 | - | 299,366    | 299,475    | gp2 | middle |
| 43 | ipu-miR-152_R+1_2ss9TC10GT    | TCAGTGCACACTACAGAACTTTGT | scaffold50.1  | + | 1,403,363  | 1,403,487  | gp2 | middle |
| 44 | dre-miR-181c-5p_R+1_1ss10TC   | CACATTCATCGCTGTCGGTGGGT  | scaffold27.1  | - | 39,357     | 39,441     | gp2 | middle |
| 45 | dre-miR-181a-2-3p_2ss16CT20AC | ACCATCGACCGTTGATTGTGCC   | scaffold32.1  | - | 353,327    | 353,434    | gp2 | middle |
| 46 | mdo-miR-187-3p_R+3            | TCGTGTCTTGTGTTGCAGCCAGA  | scaffold9.1   | - | 9,650,845  | 9,650,922  | gp2 | middle |
| 47 | dre-miR-194a_R+1              | TGTAACAGCAACTCCATGTGGA   | scaffold10.1  | + | 7,345,368  | 7,345,461  | gp2 | middle |
| 48 | ola-miR-199a-5p_R+1_1ss11AG   | CCCAGTGTTTCGGACTACCTGTTC | scaffold32.1  | - | 4,298,851  | 4,298,944  | gp2 | middle |
| 49 | ola-miR-199a-3p_R-1_1ss20TC   | ACAGTAGTCTGCACATTGGCT    | scaffold32.1  | - | 4,298,851  | 4,298,944  | gp2 | middle |
| 50 | ola-miR-199a-5p_1ss22TC       | CCCAGTGTTTCAGACTACCTGTC  | scaffold82.1  | + | 752,228    | 752,327    | gp2 | middle |
| 51 | dre-miR-200b-3p_R+2           | TAATACTGCCTGGTAATGATGATT | scaffold19.1  | + | 2,364,518  | 2,364,609  | gp2 | middle |
| 52 | dre-miR-203b-3p_L-1R+2_1ss11C | TGAAATGTTTAGGACCACTTGAT  | scaffold15.1  | - | 2,069,451  | 2,069,540  | gp2 | middle |
| 53 | dre-miR-204-5p_R+2            | TTCCCTTTGTCATCCTATGCCTGT | scaffold2.1   | - | 1,829,758  | 1,829,901  | gp2 | middle |
| 54 | dre-miR-204-5p_L+1            | TTCCCTTTGTCATCCTATGCCT   | scaffold52.1  | - | 2,330,483  | 2,330,569  | gp2 | middle |
| 55 | hsa-miR-205-5p_R+2            | TCCTTCATTCCACCGGAGTCTGTT | scaffold41.1  | - | 2,874,490  | 2,874,591  | gp2 | middle |
| 56 | dre-miR-206-3p_L-2R+2         | GAATGTAAGGAAGTGTGTGGCT   | scaffold14.1  | + | 5,270,160  | 5,270,250  | gp2 | middle |
| 57 | dre-miR-222a-5p_R-1_1ss2GT    | TTCTCAGTAGTCAGTGTAGATC   | scaffold131.1 | - | 542,697    | 542,788    | gp2 | middle |
| 58 | dre-miR-222a-3p_R+2           | AGCTACATCTGGCTACTGGGTCTC | scaffold131.1 | - | 542,697    | 542,788    | gp2 | middle |
| 59 | dre-miR-375_R+1               | TTGTTTCGTTCCGGCTCGCGTTAA | scaffold8.1   | - | 5,438,652  | 5,438,769  | gp2 | middle |

|    |                               |                          |               |   |            |            |     |        |
|----|-------------------------------|--------------------------|---------------|---|------------|------------|-----|--------|
| 60 | dre-miR-458-5p_R-1_1ss11AT    | AGCGCCATTTTCAGAGCTATA    | scaffold143.1 | + | 794,813    | 794,901    | gp2 | middle |
| 61 | dre-miR-458-3p_1ss11GA        | ATAGCTCTTTAAATGGTACTGC   | scaffold143.1 | + | 794,813    | 794,901    | gp2 | middle |
| 62 | dre-miR-462_R+3               | TAACGGAACCCATAATGCAGCTGT | scaffold19.1  | + | 3,953,867  | 3,953,948  | gp2 | middle |
| 63 | ipu-miR-499_R+2               | TTAAGACTTGCAGTGATGTTTAA  | scaffold11.1  | + | 2,482,184  | 2,482,272  | gp2 | middle |
| 64 | ipu-miR-551_R+1_1ss14GA       | GCGACCCATCCTTAGTTTCTG    | scaffold18.1  | - | 4,544,768  | 4,544,841  | gp2 | middle |
| 65 | dre-miR-725-3p_R-3_1ss17AG    | TTCAGTCATTGTTTCTGGT      | scaffold43.1  | - | 1,862,391  | 1,862,477  | gp2 | middle |
| 66 | dre-miR-736_R+1_2ss1GA21TG    | ATAAGACGAACAAAAGTTTGT    | scaffold32.1  | - | 8,458,682  | 8,458,767  | gp2 | middle |
| 67 | dre-miR-2184                  | AACAGTAAGAGTTTATGTGCT    | scaffold74.1  | - | 584,233    | 584,304    | gp2 | middle |
| 68 | dre-miR-2188-5p_R+1           | AAGGTCCAACCTCACATGTCCT   | scaffold94.1  | - | 2,151,877  | 2,152,027  | gp2 | high   |
| 69 | dre-miR-2188-3p_L+1R-1_1ss13T | GCTGTGTGAGGTCAGACCTAT    | scaffold94.1  | - | 2,151,877  | 2,152,027  | gp2 | middle |
| 70 | ccr-mir-7132-p5_1ss10TA       | GACTTGGTCAAAGCTCCTCAGT   | scaffold1.1   | - | 1,055,458  | 1,055,530  | gp2 | middle |
| 71 | ipu-mir-7552-p5               | TTACAATTAAGGATATTTCTT    | scaffold123.1 | - | 2,480,286  | 2,480,377  | gp2 | middle |
| 72 | mmu-let-7c-5p_R+2_2           | TGAGGTAGTAGGTTGTATGGTTTT | scaffold10.1  | + | 10,697,571 | 10,697,672 | gp2 | middle |
| 73 | hsa-let-7g-5p                 | TGAGGTAGTAGTTTGTACAGTT   | scaffold100.1 | - | 494,808    | 494,909    | gp2 | middle |
| 74 | dre-let-7d-5p_L+1             | CTGAGGTAGTTGGTTGTATGGTT  | scaffold30.1  | - | 634,835    | 634,935    | gp2 | middle |
| 75 | hsa-let-7e-5p_2ss9GT18TA      | TGAGGTAGTAGGTTGTAAAGTT   | scaffold41.1  | - | 2,315,232  | 2,315,358  | gp2 | middle |
