# Supplementary material for: The integrated analysis of RNA-seq and microRNA-seq depicts miRNA-mRNA networks involved in Japanese flounder (Paralichthys olivaceus) albinism
Source: PubMed Central journal article supplement (PMC5544202; doi:10.1371/journal.pone.0181761), 2017-08-04
Supplement: pone.0181761.s016.pdf [file pone.0181761.s016.pdf]

**S12 Table. 65 unique miRNAs mapping to selected species (except for Japanese flounder) miRNAs/pre-miRNAs in miRbase, but both pre-miRNA and miRNA do not map to the genome.**

| miRNA_Index | miR_name                       | miR_seq                   | #mir/MIR | group | Expression level |
|-------------|--------------------------------|---------------------------|----------|-------|------------------|
| 1           | pma-miR-1c-3p_1ss2GT           | TTGAATGTAAAGAAGTATGTAC    | 5        | gp3   | middle           |
| 2           | pma-miR-15a_R-1                | TAGCAGCACGTAATGGTTTGT     | 20       | gp3   | middle           |
| 3           | xtr-miR-15c_R-1_1ss21TA        | TAGCAGCACATCATGGTTTGA     | 18       | gp3   | middle           |
| 4           | oan-miR-16b-5p_1ss22GA         | TAGCAGCACGTAAATATTGGTA    | 44       | gp3   | middle           |
| 5           | ola-miR-19b_R+4_2              | TGTGCAAATCCATGCAAAGCTC    | 31       | gp3   | middle           |
| 6           | hsa-miR-21-5p                  | TAGCTTATCAGACTGATGTTGA    | 17       | gp3   | middle           |
| 7           | cfa-miR-22_1ss21GT             | AAGCTGCCAGTTGAAGAACTTT    | 15       | gp3   | middle           |
| 8           | pma-miR-23b_R+1_1ss23CT        | ATCACATTGCCAGGGATTACCATT  | 22       | gp3   | middle           |
| 9           | ola-miR-24b-5p_1ss17AT         | TGCCTACTGAGCTGATTACAGT    | 42       | gp3   | middle           |
| 10          | ola-miR-24b-3p_R+5             | TGGCTCAGTTCAGCAGGAACCGT   | 42       | gp3   | middle           |
| 11          | aca-miR-26-5p_L+2R+2           | TCTTCAAGTAATCCAGGATAGGCT  | 37       | gp3   | middle           |
| 12          | dre-miR-27b-3p_R+1_1ss22AT     | TTCACAGTGGCTAAGTTCTGCTT   | 28       | gp3   | middle           |
| 13          | cgr-miR-29a-3p_R+1             | TAGCACCATCTGAAATCGGTTT    | 27       | gp3   | middle           |
| 14          | aca-miR-30a-3p_R+1_1ss22CT     | CTTTCAGTCGGATGTTTGCAGTT   | 42       | gp3   | middle           |
| 15          | tgu-miR-30e_R+1                | TGTAAACATCCTACACTCAGCTA   | 39       | gp3   | middle           |
| 16          | xtr-miR-92a_R+4                | TATTGCACTTGTCCCGGCCTGTTTT | 49       | gp3   | middle           |
| 17          | mdo-miR-92a-3p_R+1_1ss22TA     | TATTGCACTTGTCCCGGCCTGAT   | 5        | gp3   | middle           |
| 18          | dre-miR-93_R+2                 | AAAAGTGCTGTTTGTGCAGGTATT  | 16       | gp3   | middle           |
| 19          | ccr-miR-99_R+2_1ss20GT         | AACCCGTAGATCCGATCTTTTGA   | 27       | gp3   | middle           |
| 20          | hsa-miR-99b-5p                 | CACCCGTAGAACCGACCTTGCG    | 3        | gp3   | middle           |
| 21          | ola-miR-106a_R+2               | TAAAGTGCTTACAGTGCAGGTAG   | 42       | gp3   | middle           |
| 22          | bta-miR-125b_R+1_1ss22AT       | TCCCTGAGACCCTAACTTGTGTT   | 42       | gp3   | middle           |
| 23          | cgr-miR-125a-5p_R-2            | TCCCTGAGACCCTTTAACCTGT    | 7        | gp3   | middle           |
| 24          | rno-miR-126a-3p_L-1R+1_1ss22GC | CGTACCGTGAGTAATAATGCCT    | 21       | gp3   | middle           |
| 25          | xtr-miR-128_R+2                | TCACAGTGAACCGGTCTCTTTTAT  | 23       | gp3   | middle           |
| 26          | hsa-miR-130b-5p_R+1            | ACTCTTCCCTGTTGCACTACT     | 34       | gp3   | middle           |
| 27          | xtr-miR-133b_L+1R+1_1ss2TG     | TGTGGTCCCCTTCAACCAGCTAT   | 19       | gp3   | middle           |

|    |                                |                             |    |     |        |
|----|--------------------------------|-----------------------------|----|-----|--------|
| 28 | dre-miR-141-3p                 | TAACACTGTCTGGTAACGATGC      | 33 | gp3 | middle |
| 29 | ola-miR-146a-5p_R-1_1ss2GT     | TTAGAACTGAATTCCATAGATGGT    | 20 | gp3 | middle |
| 30 | cfa-miR-146a                   | TGAGAACTGAATTCCATGGGTT      | 17 | gp3 | middle |
| 31 | bta-miR-150_R-1                | TCTCCCAACCCTTGTAACAGTG      | 14 | gp3 | middle |
| 32 | pma-miR-181a-5p_L+3            | ATCAACATTCAACGCTGTCCGGTGAGT | 22 | gp3 | middle |
| 33 | pma-miR-181a-3p_R+2_1ss20AG    | ACCATCGACCGTTGACTGTGCCTT    | 22 | gp3 | middle |
| 34 | mdo-miR-181b-5p_R+3            | AACATTCATTGCTGTCCGGTGGGTTGT | 19 | gp3 | middle |
| 35 | aca-miR-191-5p_R-1             | CAACGGAATCCCAAAAGCAGCT      | 14 | gp3 | middle |
| 36 | mmu-miR-195a-5p_R+1            | TAGCAGCACAGAAATATTGGCA      | 14 | gp3 | middle |
| 37 | pma-miR-196a-5p_L+3            | ATCTAGGTAGTTTCATGTTGTTGGG   | 21 | gp3 | middle |
| 38 | pma-miR-199a-5p_L+3            | ATCCCCAGTGTTTCAGACTACCTGTTC | 32 | gp3 | middle |
| 39 | pma-miR-199b-3p_L+1_2ss20TG22A | ACAGTAGTCTGCACATTGGGTT      | 32 | gp3 | middle |
| 40 | aca-miR-200b-3p_R+3            | TAATACTGCCTGGTAATGATGATTT   | 23 | gp3 | middle |
| 41 | ccr-miR-203a_L-1R+2            | TGAAATGTTTAGGACCACTTGTT     | 15 | gp3 | middle |
| 42 | pma-miR-204-5p_R+2             | TTCCCTTTGTCATCCTATGCCTTT    | 16 | gp3 | middle |
| 43 | oan-miR-205-5p_R+5             | TCCTTCATTCCACCGGAGTCTGTTTT  | 26 | gp3 | middle |
| 44 | ssc-miR-206_1ss2GT             | TTGAATGTAAGGAAGTGTGTGA      | 9  | gp3 | middle |
| 45 | mdo-miR-210-3p_L-1R+3          | CTGTGCGTGTGACAGCGGCTACT     | 15 | gp3 | middle |
| 46 | tgu-miR-214-3p_L+1R+2          | TACAGCAGGCACAGACAGGCAGTAG   | 3  | gp3 | middle |
| 47 | ola-miR-214_L-1R+8             | TACAGCAGGCACAGACAGGCAGAAAA  | 1  | gp3 | middle |
| 48 | bta-miR-218_R+2                | TTGTGCTTGATCTAACCATGTGTT    | 36 | gp3 | middle |
| 49 | pma-miR-221                    | AGCTACATTGTCTGCTGGGTTTC     | 21 | gp3 | middle |
| 50 | bta-miR-374a_R-1               | TTATAATACAACCTGATAAGT       | 17 | gp3 | middle |
| 51 | ggo-miR-424                    | CAGCAGCAATTCATGTTTTGA       | 9  | gp3 | middle |
| 52 | cfa-miR-429_R+2                | TAATACTGTCTGGTAATGCCGTTT    | 7  | gp3 | middle |
| 53 | hhi-miR-430b_R+1               | TAAGTGCTTCTCTTTGGGGTTGT     | 6  | gp3 | middle |
| 54 | gga-miR-456-3p_R+1_1ss22AT     | CAGGCTGGTTAGATGGTTGTCTT     | 6  | gp3 | middle |
| 55 | mdo-miR-499-5p_R+3             | TAAAGACTTGCAGTGATGTTTATT    | 16 | gp3 | middle |
| 56 | oan-miR-1386_L+2               | GACTCCTGGCTGGCTCGCCA        | 1  | gp3 | middle |
| 57 | gga-miR-2188-5p_R+3            | AAGGTCCAACCTCACATGTCCTTTA   | 5  | gp3 | middle |
| 58 | bta-miR-2478_L+2               | TCGTATCCCCTTCTGACACCA       | 1  | gp3 | middle |
| 59 | hsa-miR-4286_R+1               | ACCCCACTCCTGGTACCA          | 3  | gp3 | middle |

|    |                             |                          |    |     |        |
|----|-----------------------------|--------------------------|----|-----|--------|
| 60 | hsa-miR-4454_L-2_1ss8AG     | ATCCGGGTCACGGCACCA       | 1  | gp3 | middle |
| 61 | mmu-miR-6240_L-1R-1_1ss25CT | CAAAGCATCGCGAAGGCCACGGT  | 2  | gp3 | middle |
| 62 | hsa-miR-7977_1ss6AG         | TTCCCGGCCAACGCACCA       | 1  | gp3 | middle |
| 63 | mmu-let-7c-5p_R+2_1         | TGAGGTAGTAGGTTGTATGGTTAT | 89 | gp3 | middle |
| 64 | tmi-let-7j_1ss2GT           | TTAGGTAGTTTTTTGTACAGTT   | 15 | gp3 | middle |
| 65 | hsa-let-7e-5p_1ss6TG        | TGAGGGAGGAGGTTGTATAGTT   | 8  | gp3 | middle |

---
