# Supplementary material for: The integrated analysis of RNA-seq and microRNA-seq depicts miRNA-mRNA networks involved in Japanese flounder (Paralichthys olivaceus) albinism
Source: PubMed Central journal article supplement (PMC5544202; doi:10.1371/journal.pone.0181761), 2017-08-04
Supplement: pone.0181761.s017.pdf [file pone.0181761.s017.pdf]

**S13 Table. 64 novel unique miRNAs which do not map to selected pre-miRNAs in miRbase, but the reads map to genome & the extended genome sequences from genome may form hairpins.**

| miRNA_Index | miR_name        | miR_seq                    | genomeID      | strand | start     | end       | Sequence   |       |                  |
|-------------|-----------------|----------------------------|---------------|--------|-----------|-----------|------------|-------|------------------|
|             |                 |                            |               |        |           |           | in miRbase | group | Expression level |
| 1           | PC-5p-49538_17  | GAACTATTCTGCAACATTTGTT     | scaffold8.1   | +      | 3,440,394 | 3,440,477 | New        | gp4   | middle           |
| 2           | PC-3p-27631_54  | TAAATGCTGCAGAATTGTGCTC     | scaffold8.1   | +      | 3,440,394 | 3,440,477 | New        | gp4   | middle           |
| 3           | PC-5p-16384_114 | TCAGTCTTCAGTTCCTCCCAGCT    | scaffold58.1  | +      | 3,301,509 | 3,301,605 | New        | gp4   | middle           |
| 4           | PC-3p-34584_37  | TTGAGGCGAGTTGAAGACTTCT     | scaffold58.1  | +      | 3,301,509 | 3,301,605 | New        | gp4   | middle           |
| 5           | PC-5p-74680_7   | GATCCTGTAGAGAAGACATTTTGTTT | 86,201,401    | +      | 419       | 571       | New        | gp4   | middle           |
| 6           | PC-3p-237956_2  | TCTGTAAAGTGTA AAAAATTGACT  | 86,201,401    | +      | 419       | 571       | New        | gp4   | middle           |
| 7           | PC-5p-53714_14  | TCATGCACCCCTCTGGAGAATGT    | scaffold113.1 | +      | 263,936   | 264,026   | New        | gp4   | middle           |
| 8           | PC-3p-56229_13  | TTATTCAGGGTTCGGTGCATGTTT   | scaffold113.1 | +      | 263,936   | 264,026   | New        | gp4   | middle           |
| 9           | PC-5p-20206_87  | TTCAGGTCCTGGTCTCAGTACT     | scaffold151.1 | -      | 2,643,968 | 2,644,106 | New        | gp4   | middle           |
| 10          | PC-3p-36824_33  | TTCAGATCCTGGTCTCAGTACT     | scaffold151.1 | -      | 2,643,968 | 2,644,106 | New        | gp4   | middle           |
| 11          | PC-5p-1227_1088 | AGCTAGAAACTTTGCCTGGGAAT    | scaffold43.1  | -      | 1,862,388 | 1,862,497 | New        | gp4   | middle           |
| 12          | PC-3p-53_52086  | TTCAGTCATTGTTTCTGGTCGT     | scaffold43.1  | -      | 1,862,388 | 1,862,497 | New        | gp4   | high             |
| 13          | PC-5p-59688_11  | TTCAAGTAATCCAGGATAGGTAT    | scaffold49.1  | +      | 2,642,987 | 2,643,088 | New        | gp4   | middle           |
| 14          | PC-3p-13617_140 | CCTATTCTGGATGACTTGGGTC     | scaffold49.1  | +      | 2,642,987 | 2,643,088 | New        | gp4   | middle           |
| 15          | PC-5p-16752_111 | GAAACCAAGTGTGGGTGTGGCCT    | scaffold18.1  | -      | 4,544,767 | 4,544,840 | New        | gp4   | middle           |
| 16          | PC-3p-654_1952  | GCGACCCATCCTTAGTTTCTGT     | scaffold18.1  | -      | 4,544,767 | 4,544,840 | New        | gp4   | middle           |
| 17          | PC-3p-25255_63  | TGTTGCTGTCACATGGTAAATT     | scaffold11.1  | +      | 2,488,703 | 2,488,812 | New        | gp4   | middle           |
| 18          | PC-5p-69891_8   | GACCTGCTGGAGCTACTGGCCCATC  | scaffold9.1   | -      | 8,599,989 | 8,600,092 | New        | gp4   | middle           |
| 19          | PC-3p-264971_2  | GGTGCTGTTGGCCCCGTTGGTCCCCG | scaffold9.1   | -      | 8,599,989 | 8,600,092 | New        | gp4   | middle           |
| 20          | PC-5p-27999_53  | CAGGACTTGACCCACATGTGAAA    | 328,521,904   | +      | 497       | 624       | New        | gp4   | middle           |
| 21          | PC-3p-6752_280  | TTACATTTGTTTTCTTGGCATG     | scaffold220.1 | +      | 170,623   | 170,712   | New        | gp4   | middle           |
| 22          | PC-3p-38603_30  | TTCAGTTGCTGCGGACATTCT      | scaffold52.1  | -      | 1,601,989 | 1,602,098 | New        | gp4   | middle           |
| 23          | PC-3p-55961_13  | CCTGGACCTGGATTCCTCATGC     | scaffold60.1  | +      | 2,037,655 | 2,037,794 | New        | gp4   | middle           |
| 24          | PC-5p-31696_43  | TAGGTAACCGGACTTGCTTGTT     | scaffold4.1   | -      | 8,810,375 | 8,810,491 | New        | gp4   | middle           |
| 25          | PC-5p-24589_65  | CAGCTTTTTGTTTGTGTTATTT     | scaffold32.1  | -      | 8,458,750 | 8,458,835 | New        | gp4   | middle           |

|    |                 |                           |               |   |            |            |     |     |        |
|----|-----------------|---------------------------|---------------|---|------------|------------|-----|-----|--------|
| 26 | PC-5p-169817_2  | CTATGACTCTCTTAATGTAGC     | scaffold25.1  | - | 5,078,542  | 5,078,699  | New | gp4 | middle |
| 27 | PC-5p-42145_25  | CTCCAGTGTACCCAGATTTTGA    | scaffold6.1   | - | 5,845,815  | 5,845,902  | New | gp4 | middle |
| 28 | PC-5p-43206_23  | TGAGCTTCTGTCTTTCTCTCATT   | scaffold125.1 | + | 646,882    | 646,978    | New | gp4 | middle |
| 29 | PC-3p-5079_357  | CTGGGAGAGGGGTGTTTACGCT    | scaffold9.1   | + | 10,248,971 | 10,249,060 | New | gp4 | middle |
| 30 | PC-3p-35576_35  | TCCTGTCTGTTGGTCAGTAGGTC   | scaffold62.1  | - | 2,492,053  | 2,492,157  | New | gp4 | middle |
| 31 | PC-3p-7808_245  | ATCTATGGGCTTAGTTCTTTTGT   | scaffold16.1  | - | 3,774,283  | 3,774,388  | New | gp4 | middle |
| 32 | PC-3p-26319_59  | CAATGTGTCTGCAGTGCAGTAT    | scaffold110.1 | - | 2,144,983  | 2,145,123  | New | gp4 | middle |
| 33 | PC-5p-46961_19  | CCCCTTTTCTCTGCCGTCGTCCC   | scaffold7.1   | - | 3,076,113  | 3,076,221  | New | gp4 | middle |
| 34 | PC-3p-42021_25  | TGCTATGCCATCAAATTGTCATC   | scaffold38.1  | + | 683,764    | 683,841    | New | gp4 | middle |
| 35 | PC-5p-37503_31  | TCGTCAGCTGCGAGTCGACCT     | scaffold136.1 | + | 178,245    | 178,355    | New | gp4 | middle |
| 36 | PC-3p-89852_5   | TCTGAAACGTTTCTACCGGAGT    | scaffold94.1  | - | 2,150,708  | 2,150,809  | New | gp4 | middle |
| 37 | PC-5p-15232_124 | ACTGGTTTTCAGATGGTGTCTTAGA | scaffold41.1  | + | 3,009,498  | 3,009,619  | New | gp4 | middle |
| 38 | PC-3p-45646_21  | TGCTCCGTGATTGGCTACTTGC    | scaffold98.1  | - | 1,977,679  | 1,977,767  | New | gp4 | middle |
| 39 | PC-3p-51633_16  | ACTGCAAACCAGCACTTCAGG     | scaffold46.1  | + | 1,400,920  | 1,401,054  | New | gp4 | middle |
| 40 | PC-5p-59593_11  | GGACCCGTAGATCCGAACTTGT    | scaffold190.1 | + | 665,277    | 665,406    | New | gp4 | middle |
| 41 | PC-5p-1022_1281 | AGGACTTGGCTCGCTCCGTGA     | scaffold44.1  | - | 1,749,999  | 1,750,113  | New | gp4 | middle |
| 42 | PC-3p-5807_319  | TATTGCACTTGTCCCGCCTGTATT  | scaffold50.1  | - | 2,082,282  | 2,082,372  | New | gp4 | middle |
| 43 | PC-5p-401_3759  | GACTTGGTCAAAGCTCCTCAGC    | scaffold1.1   | - | 1,055,458  | 1,055,530  | New | gp4 | middle |
| 44 | PC-3p-42954_24  | TTCACGTGGCTCGAGTCTTCCT    | scaffold163.1 | + | 563,556    | 563,654    | New | gp4 | middle |
| 45 | PC-3p-28057_53  | AGGGCGAAGCCAGAGGAA        | scaffold60.1  | + | 2,872,352  | 2,872,413  | New | gp4 | middle |
| 46 | PC-5p-22736_74  | AAATCAGATCCGTA ACTTC      | scaffold162.1 | - | 337,210    | 337,276    | New | gp4 | middle |
| 47 | PC-5p-50298_16  | TTTCCCTGCTTAGCTTGAGACT    | scaffold32.1  | - | 5,471,811  | 5,471,967  | New | gp4 | middle |
| 48 | PC-3p-44336_22  | TGGCTCAGTCCAGCAGGAACAA    | scaffold44.1  | - | 3,007,244  | 3,007,355  | New | gp4 | middle |
| 49 | PC-5p-81051_6   | CGGGGCCGGGACGCTGTCTGAGAA  | scaffold203.1 | - | 226,620    | 226,758    | New | gp4 | middle |
| 50 | PC-3p-39711_28  | CCCGAGCTGCTGCGATCACCGCT   | scaffold151.1 | - | 2,772,641  | 2,772,734  | New | gp4 | middle |
| 51 | PC-5p-43190_23  | TAACAGAACACAACTTACTG      | scaffold1.1   | - | 9,119,362  | 9,119,514  | New | gp4 | middle |
| 52 | PC-5p-62148_10  | TGTAACAGCATCTCCATATGGA    | scaffold5.1   | - | 2,110,770  | 2,110,852  | New | gp4 | middle |
| 53 | PC-5p-28653_51  | TACCCTTCCAGCTGAAATCTG     | scaffold110.1 | + | 1,947,550  | 1,947,656  | New | gp4 | middle |
| 54 | PC-5p-72016_8   | CGTCTTACCTTACAGTGCTGGA    | scaffold19.1  | + | 2,364,694  | 2,364,777  | New | gp4 | middle |
| 55 | PC-5p-45747_20  | TCTCCGGCTCCTGAGATGAAC     | scaffold42.1  | + | 520,443    | 520,499    | New | gp4 | middle |
| 56 | PC-5p-14199_134 | TCTAATCGCTGTGCTGAAGTGT    | scaffold57.1  | + | 1,098,908  | 1,099,027  | New | gp4 | middle |
| 57 | PC-5p-66778_9   | ACTGTTGTTCTCTTTGGTTGC     | scaffold92.1  | - | 2,085,183  | 2,085,261  | New | gp4 | middle |

|    |                 |                           |               |   |           |           |     |     |        |
|----|-----------------|---------------------------|---------------|---|-----------|-----------|-----|-----|--------|
| 58 | PC-3p-43498_23  | CTATACAACCTTACTGCCTTCCTA  | scaffold100.1 | - | 494,406   | 494,528   | New | gp4 | middle |
| 59 | PC-5p-42988_24  | ATTGCACAGTATGTGCTCTGGTCCT | scaffold192.1 | + | 333,011   | 333,111   | New | gp4 | middle |
| 60 | PC-3p-38354_30  | GATTTCAGTGGTGTGAAGAGTAT   | scaffold41.1  | - | 2,874,406 | 2,874,524 | New | gp4 | middle |
| 61 | PC-3p-52560_15  | TAACTCGTCGCTCTGTCCTCCCC   | scaffold56.1  | - | 990,434   | 990,542   | New | gp4 | middle |
| 62 | PC-5p-14246_134 | AGAGCTTAGTCGACTGCTGAAC    | scaffold54.1  | - | 2,162,976 | 2,163,111 | New | gp4 | middle |
| 63 | PC-5p-26963_57  | TATGGATCATGAGTGATGTTCT    | scaffold146.1 | - | 153,809   | 153,946   | New | gp4 | middle |
| 64 | PC-3p-1069_1227 | ACCATCGACCGTTAAATGTACC    | scaffold53.11 | + | 1,278,385 | 1,278,487 | New | gp4 | middle |

---
