# Supplementary material for: The integrated analysis of RNA-seq and microRNA-seq depicts miRNA-mRNA networks involved in Japanese flounder (Paralichthys olivaceus) albinism
Source: PubMed Central journal article supplement (PMC5544202; doi:10.1371/journal.pone.0181761), 2017-08-04
Supplement: pone.0181761.s018.pdf [file pone.0181761.s018.pdf]

**S14 Table. The significant enrichment of GO terms for target genes of miRNAs ( $p \leq 0.001$ ).**

| GO ID      | Function           | GO_term                                                                            | S gene number | TS gene number | B gene number | TB gene number | Pvalue of Fisher's Exact Test |
|------------|--------------------|------------------------------------------------------------------------------------|---------------|----------------|---------------|----------------|-------------------------------|
| GO:0043565 | molecular_function | sequence-specific DNA binding                                                      | 398           | 10,676         | 966           | 41,389         | 0.00E+00                      |
| GO:0005739 | cellular_component | mitochondrion                                                                      | 302           | 10,676         | 734           | 41,389         | 0.00E+00                      |
| GO:0003700 | molecular_function | sequence-specific DNA binding transcription factor activity                        | 514           | 10,676         | 1,349         | 41,389         | 0.00E+00                      |
| GO:0003735 | molecular_function | structural constituent of ribosome                                                 | 100           | 10,676         | 145           | 41,389         | 1.40E-27                      |
| GO:0006412 | biological_process | translation                                                                        | 96            | 10,676         | 147           | 41,389         | 8.79E-24                      |
| GO:0009055 | molecular_function | electron carrier activity                                                          | 90            | 10,676         | 139           | 41,389         | 5.31E-22                      |
| GO:0005743 | cellular_component | mitochondrial inner membrane                                                       | 129           | 10,676         | 234           | 41,389         | 1.32E-21                      |
| GO:0004984 | molecular_function | olfactory receptor activity                                                        | 43            | 10,676         | 48            | 41,389         | 1.88E-20                      |
| GO:0005840 | cellular_component | ribosome                                                                           | 77            | 10,676         | 118           | 41,389         | 2.44E-19                      |
| GO:0006364 | biological_process | rRNA processing                                                                    | 48            | 10,676         | 61            | 41,389         | 7.94E-18                      |
| GO:0005179 | molecular_function | hormone activity                                                                   | 55            | 10,676         | 77            | 41,389         | 6.62E-17                      |
| GO:0003723 | molecular_function | RNA binding                                                                        | 351           | 10,676         | 898           | 41,389         | 2.22E-16                      |
| GO:0030170 | molecular_function | pyridoxal phosphate binding                                                        | 46            | 10,676         | 61            | 41,389         | 7.26E-16                      |
| GO:0005634 | cellular_component | nucleus                                                                            | 1,982         | 10,676         | 6,451         | 41,389         | 7.77E-16                      |
| GO:0005730 | cellular_component | nucleolus                                                                          | 206           | 10,676         | 490           | 41,389         | 2.33E-15                      |
| GO:0003677 | molecular_function | DNA binding                                                                        | 761           | 10,676         | 2,316         | 41,389         | 3.22E-15                      |
| GO:0022900 | biological_process | electron transport chain                                                           | 55            | 10,676         | 83            | 41,389         | 1.16E-14                      |
| GO:0016338 | biological_process | calcium-independent cell-cell adhesion via plasma membrane cell-adhesion molecules | 37            | 10,676         | 49            | 41,389         | 4.68E-13                      |
| GO:0005576 | cellular_component | extracellular region                                                               | 440           | 10,676         | 1,283         | 41,389         | 4.08E-12                      |
| GO:0003924 | molecular_function | GTPase activity                                                                    | 137           | 10,676         | 318           | 41,389         | 1.45E-11                      |
| GO:0005922 | cellular_component | connexon complex                                                                   | 32            | 10,676         | 43            | 41,389         | 3.50E-11                      |
| GO:0016787 | molecular_function | hydrolase activity                                                                 | 95            | 10,676         | 201           | 41,389         | 4.40E-11                      |
| GO:0006096 | biological_process | glycolytic process                                                                 | 42            | 10,676         | 65            | 41,389         | 5.38E-11                      |
| GO:0020037 | molecular_function | heme binding                                                                       | 79            | 10,676         | 158           | 41,389         | 6.02E-11                      |
| GO:0008168 | molecular_function | methyltransferase activity                                                         | 43            | 10,676         | 68            | 41,389         | 9.03E-11                      |
| GO:0016491 | molecular_function | oxidoreductase activity                                                            | 62            | 10,676         | 116           | 41,389         | 2.04E-10                      |
| GO:0051537 | molecular_function | 2 iron, 2 sulfur cluster binding                                                   | 20            | 10,676         | 22            | 41,389         | 2.21E-10                      |

|            |                    |                                                                                                                                            |       |        |       |        |          |
|------------|--------------------|--------------------------------------------------------------------------------------------------------------------------------------------|-------|--------|-------|--------|----------|
| GO:0006397 | biological_process | mRNA processing                                                                                                                            | 144   | 10,676 | 353   | 41,389 | 4.84E-10 |
| GO:0015020 | molecular_function | glucuronosyltransferase activity                                                                                                           | 17    | 10,676 | 18    | 41,389 | 1.34E-09 |
| GO:0070936 | biological_process | protein K48-linked ubiquitination                                                                                                          | 30    | 10,676 | 43    | 41,389 | 1.92E-09 |
| GO:0006457 | biological_process | protein folding                                                                                                                            | 81    | 10,676 | 173   | 41,389 | 1.98E-09 |
| GO:0005741 | cellular_component | mitochondrial outer membrane                                                                                                               | 63    | 10,676 | 127   | 41,389 | 7.40E-09 |
| GO:0005681 | cellular_component | spliceosomal complex                                                                                                                       | 45    | 10,676 | 82    | 41,389 | 2.04E-08 |
| GO:0008380 | biological_process | RNA splicing                                                                                                                               | 106   | 10,676 | 254   | 41,389 | 2.15E-08 |
| GO:0016706 | molecular_function | incorporation or reduction of molecular oxygen, 2-oxoglutarate as one donor, and incorporation of one atom each of oxygen into both donors | 13    | 10,676 | 13    | 41,389 | 2.23E-08 |
| GO:0031902 | cellular_component | late endosome membrane                                                                                                                     | 38    | 10,676 | 66    | 41,389 | 4.50E-08 |
| GO:0055038 | cellular_component | recycling endosome membrane                                                                                                                | 25    | 10,676 | 36    | 41,389 | 5.04E-08 |
| GO:0005328 | molecular_function | neurotransmitter:sodium symporter activity                                                                                                 | 29    | 10,676 | 45    | 41,389 | 5.63E-08 |
| GO:0031625 | molecular_function | ubiquitin protein ligase binding                                                                                                           | 37    | 10,676 | 64    | 41,389 | 5.82E-08 |
| GO:0008378 | molecular_function | galactosyltransferase activity                                                                                                             | 19    | 10,676 | 24    | 41,389 | 6.82E-08 |
| GO:0005212 | molecular_function | structural constituent of eye lens                                                                                                         | 28    | 10,676 | 43    | 41,389 | 6.86E-08 |
| GO:0008270 | molecular_function | zinc ion binding                                                                                                                           | 1,083 | 10,676 | 3,680 | 41,389 | 1.02E-07 |
| GO:0000932 | cellular_component | cytoplasmic mRNA processing body                                                                                                           | 32    | 10,676 | 53    | 41,389 | 1.12E-07 |
| GO:0030433 | biological_process | ER-associated ubiquitin-dependent protein catabolic process                                                                                | 15    | 10,676 | 17    | 41,389 | 1.16E-07 |
| GO:0005215 | molecular_function | transporter activity                                                                                                                       | 73    | 10,676 | 163   | 41,389 | 1.17E-07 |
| GO:0016301 | molecular_function | kinase activity                                                                                                                            | 16    | 10,676 | 19    | 41,389 | 1.61E-07 |
| GO:0008233 | molecular_function | peptidase activity                                                                                                                         | 16    | 10,676 | 19    | 41,389 | 1.61E-07 |
| GO:0005125 | molecular_function | cytokine activity                                                                                                                          | 39    | 10,676 | 71    | 41,389 | 1.70E-07 |
| GO:0006783 | biological_process | heme biosynthetic process                                                                                                                  | 13    | 10,676 | 14    | 41,389 | 2.37E-07 |
| GO:0070403 | molecular_function | NAD+ binding                                                                                                                               | 11    | 10,676 | 11    | 41,389 | 3.35E-07 |
| GO:0005845 | cellular_component | mRNA cap binding complex                                                                                                                   | 11    | 10,676 | 11    | 41,389 | 3.35E-07 |
| GO:0004303 | molecular_function | estradiol 17-beta-dehydrogenase activity                                                                                                   | 11    | 10,676 | 11    | 41,389 | 3.35E-07 |
| GO:0003755 | molecular_function | peptidyl-prolyl cis-trans isomerase activity                                                                                               | 30    | 10,676 | 50    | 41,389 | 3.37E-07 |
| GO:0005792 | cellular_component | microsome                                                                                                                                  | 106   | 10,676 | 266   | 41,389 | 3.46E-07 |
| GO:0006914 | biological_process | autophagy                                                                                                                                  | 22    | 10,676 | 32    | 41,389 | 4.29E-07 |
| GO:0015031 | biological_process | protein transport                                                                                                                          | 286   | 10,676 | 860   | 41,389 | 5.10E-07 |
| GO:0045087 | biological_process | innate immune response                                                                                                                     | 75    | 10,676 | 174   | 41,389 | 5.15E-07 |

|            |                    |                                                                |     |        |       |        |          |
|------------|--------------------|----------------------------------------------------------------|-----|--------|-------|--------|----------|
| GO:0005789 | cellular_component | endoplasmic reticulum membrane                                 | 349 | 10,676 | 1,077 | 41,389 | 5.41E-07 |
| GO:0019835 | biological_process | cytolysis                                                      | 20  | 10,676 | 28    | 41,389 | 5.52E-07 |
| GO:0008137 | molecular_function | NADH dehydrogenase (ubiquinone) activity                       | 16  | 10,676 | 20    | 41,389 | 6.09E-07 |
| GO:0019843 | molecular_function | rRNA binding                                                   | 18  | 10,676 | 24    | 41,389 | 6.38E-07 |
| GO:0005758 | cellular_component | mitochondrial intermembrane space                              | 17  | 10,676 | 22    | 41,389 | 6.43E-07 |
| GO:0007586 | biological_process | digestion                                                      | 24  | 10,676 | 37    | 41,389 | 6.65E-07 |
| GO:0005759 | cellular_component | mitochondrial matrix                                           | 83  | 10,676 | 199   | 41,389 | 7.01E-07 |
| GO:0005654 | cellular_component | nucleoplasm                                                    | 186 | 10,676 | 527   | 41,389 | 7.49E-07 |
| GO:0051287 | molecular_function | NAD binding                                                    | 33  | 10,676 | 59    | 41,389 | 8.54E-07 |
| GO:0009982 | molecular_function | pseudouridine synthase activity                                | 12  | 10,676 | 13    | 41,389 | 8.56E-07 |
| GO:0050662 | molecular_function | coenzyme binding                                               | 12  | 10,676 | 13    | 41,389 | 8.56E-07 |
| GO:0005507 | molecular_function | copper ion binding                                             | 22  | 10,676 | 33    | 41,389 | 9.71E-07 |
| GO:0030145 | molecular_function | manganese ion binding                                          | 22  | 10,676 | 33    | 41,389 | 9.71E-07 |
| GO:0000166 | molecular_function | nucleotide binding                                             | 200 | 10,676 | 577   | 41,389 | 1.22E-06 |
| GO:0001619 | molecular_function | lysosphingolipid and lysophosphatidic acid receptor activity   | 10  | 10,676 | 10    | 41,389 | 1.30E-06 |
| GO:0009411 | biological_process | response to UV                                                 | 14  | 10,676 | 17    | 41,389 | 1.71E-06 |
| GO:0000398 | biological_process | mRNA splicing, via spliceosome                                 | 34  | 10,676 | 63    | 41,389 | 1.78E-06 |
| GO:0005975 | biological_process | carbohydrate metabolic process                                 | 67  | 10,676 | 155   | 41,389 | 1.79E-06 |
| GO:0006986 | biological_process | response to unfolded protein                                   | 17  | 10,676 | 23    | 41,389 | 1.87E-06 |
| GO:0005525 | molecular_function | GTP binding                                                    | 312 | 10,676 | 963   | 41,389 | 2.15E-06 |
| GO:0030529 | cellular_component | ribonucleoprotein complex                                      | 45  | 10,676 | 93    | 41,389 | 2.34E-06 |
| GO:0004181 | molecular_function | metallocarboxypeptidase activity                               | 20  | 10,676 | 30    | 41,389 | 3.06E-06 |
| GO:0001944 | biological_process | vasculature development                                        | 11  | 10,676 | 12    | 41,389 | 3.07E-06 |
| GO:0031227 | cellular_component | intrinsic component of endoplasmic reticulum membrane          | 11  | 10,676 | 12    | 41,389 | 3.07E-06 |
| GO:0032088 | biological_process | negative regulation of NF-kappaB transcription factor activity | 23  | 10,676 | 37    | 41,389 | 3.37E-06 |
| GO:0008083 | molecular_function | growth factor activity                                         | 87  | 10,676 | 218   | 41,389 | 3.43E-06 |
| GO:0015991 | biological_process | ATP hydrolysis coupled proton transport                        | 25  | 10,676 | 42    | 41,389 | 3.93E-06 |
| GO:0005000 | molecular_function | vasopressin receptor activity                                  | 9   | 10,676 | 9     | 41,389 | 5.04E-06 |
| GO:0008180 | cellular_component | COP9 signalosome                                               | 9   | 10,676 | 9     | 41,389 | 5.04E-06 |
| GO:0005811 | cellular_component | lipid particle                                                 | 14  | 10,676 | 18    | 41,389 | 5.86E-06 |
| GO:0005814 | cellular_component | centriole                                                      | 25  | 10,676 | 43    | 41,389 | 7.09E-06 |
| GO:0005778 | cellular_component | peroxisomal membrane                                           | 32  | 10,676 | 61    | 41,389 | 7.88E-06 |

|            |                    |                                                                         |    |        |     |        |          |
|------------|--------------------|-------------------------------------------------------------------------|----|--------|-----|--------|----------|
| GO:0006888 | biological_process | ER to Golgi vesicle-mediated transport                                  | 19 | 10,676 | 29  | 41,389 | 7.98E-06 |
| GO:0043169 | molecular_function | cation binding                                                          | 33 | 10,676 | 64  | 41,389 | 9.26E-06 |
| GO:0030308 | biological_process | negative regulation of cell growth                                      | 33 | 10,676 | 64  | 41,389 | 9.26E-06 |
| GO:0040008 | biological_process | regulation of growth                                                    | 33 | 10,676 | 64  | 41,389 | 9.26E-06 |
| GO:0007602 | biological_process | phototransduction                                                       | 26 | 10,676 | 46  | 41,389 | 9.49E-06 |
| GO:0006310 | biological_process | DNA recombination                                                       | 34 | 10,676 | 67  | 41,389 | 1.07E-05 |
| GO:0008235 | molecular_function | metalloexopeptidase activity                                            | 10 | 10,676 | 11  | 41,389 | 1.09E-05 |
| GO:0009103 | biological_process | lipopolysaccharide biosynthetic process                                 | 10 | 10,676 | 11  | 41,389 | 1.09E-05 |
| GO:0016918 | molecular_function | retinal binding                                                         | 10 | 10,676 | 11  | 41,389 | 1.09E-05 |
| GO:0045028 | molecular_function | G-protein coupled purinergic nucleotide receptor activity               | 17 | 10,676 | 25  | 41,389 | 1.15E-05 |
| GO:0034641 | biological_process | cellular nitrogen compound metabolic process                            | 16 | 10,676 | 23  | 41,389 | 1.35E-05 |
| GO:0006071 | biological_process | glycerol metabolic process                                              | 16 | 10,676 | 23  | 41,389 | 1.35E-05 |
| GO:0005694 | cellular_component | chromosome                                                              | 47 | 10,676 | 104 | 41,389 | 1.45E-05 |
| GO:0019841 | molecular_function | retinol binding                                                         | 11 | 10,676 | 13  | 41,389 | 1.53E-05 |
| GO:0004983 | molecular_function | neuropeptide Y receptor activity                                        | 11 | 10,676 | 13  | 41,389 | 1.53E-05 |
| GO:0009058 | biological_process | biosynthetic process                                                    | 15 | 10,676 | 21  | 41,389 | 1.54E-05 |
| GO:0070330 | molecular_function | aromatase activity                                                      | 15 | 10,676 | 21  | 41,389 | 1.54E-05 |
| GO:0000922 | cellular_component | spindle pole                                                            | 44 | 10,676 | 96  | 41,389 | 1.74E-05 |
| GO:0055072 | biological_process | iron ion homeostasis                                                    | 12 | 10,676 | 15  | 41,389 | 1.74E-05 |
| GO:0004806 | molecular_function | triglyceride lipase activity                                            | 13 | 10,676 | 17  | 41,389 | 1.78E-05 |
| GO:0051536 | molecular_function | iron-sulfur cluster binding                                             | 8  | 10,676 | 8   | 41,389 | 1.96E-05 |
| GO:0001614 | molecular_function | purinergic nucleotide receptor activity                                 | 8  | 10,676 | 8   | 41,389 | 1.96E-05 |
| GO:0004982 | molecular_function | N-formyl peptide receptor activity                                      | 8  | 10,676 | 8   | 41,389 | 1.96E-05 |
| GO:0005777 | cellular_component | peroxisome                                                              | 36 | 10,676 | 74  | 41,389 | 1.99E-05 |
| GO:0003729 | molecular_function | mRNA binding                                                            | 18 | 10,676 | 28  | 41,389 | 2.05E-05 |
| GO:0004091 | molecular_function | carboxylesterase activity                                               | 23 | 10,676 | 40  | 41,389 | 2.11E-05 |
| GO:0005643 | cellular_component | nuclear pore                                                            | 30 | 10,676 | 58  | 41,389 | 2.16E-05 |
| GO:0006631 | biological_process | fatty acid metabolic process                                            | 34 | 10,676 | 69  | 41,389 | 2.39E-05 |
| GO:0051781 | biological_process | positive regulation of cell division                                    | 28 | 10,676 | 53  | 41,389 | 2.42E-05 |
| GO:0018298 | biological_process | protein-chromophore linkage                                             | 26 | 10,676 | 48  | 41,389 | 2.64E-05 |
| GO:0000079 | biological_process | regulation of cyclin-dependent protein serine/threonine kinase activity | 22 | 10,676 | 38  | 41,389 | 2.75E-05 |

|            |                    |                                                                        |     |        |     |        |          |
|------------|--------------------|------------------------------------------------------------------------|-----|--------|-----|--------|----------|
| GO:0000082 | biological_process | G1/S transition of mitotic cell cycle                                  | 24  | 10,676 | 43  | 41,389 | 2.77E-05 |
| GO:0009968 | biological_process | negative regulation of signal transduction                             | 32  | 10,676 | 64  | 41,389 | 2.83E-05 |
| GO:0031901 | cellular_component | early endosome membrane                                                | 44  | 10,676 | 98  | 41,389 | 3.27E-05 |
| GO:0006805 | biological_process | xenobiotic metabolic process                                           | 23  | 10,676 | 41  | 41,389 | 3.64E-05 |
| GO:0043066 | biological_process | negative regulation of apoptotic process                               | 52  | 10,676 | 122 | 41,389 | 3.85E-05 |
| GO:0042446 | biological_process | hormone biosynthetic process                                           | 9   | 10,676 | 10  | 41,389 | 3.87E-05 |
| GO:0015355 | molecular_function | secondary active monocarboxylate transmembrane transporter activity    | 9   | 10,676 | 10  | 41,389 | 3.87E-05 |
| GO:0006626 | biological_process | protein targeting to mitochondrion                                     | 9   | 10,676 | 10  | 41,389 | 3.87E-05 |
| GO:0003810 | molecular_function | protein-glutamine gamma-glutamyltransferase activity                   | 9   | 10,676 | 10  | 41,389 | 3.87E-05 |
| GO:0006183 | biological_process | GTP biosynthetic process                                               | 9   | 10,676 | 10  | 41,389 | 3.87E-05 |
| GO:0001522 | biological_process | pseudouridine synthesis                                                | 9   | 10,676 | 10  | 41,389 | 3.87E-05 |
| GO:0006298 | biological_process | mismatch repair                                                        | 9   | 10,676 | 10  | 41,389 | 3.87E-05 |
| GO:0015250 | molecular_function | water channel activity                                                 | 9   | 10,676 | 10  | 41,389 | 3.87E-05 |
| GO:0030968 | biological_process | endoplasmic reticulum unfolded protein response                        | 9   | 10,676 | 10  | 41,389 | 3.87E-05 |
| GO:0055085 | biological_process | transmembrane transport                                                | 101 | 10,676 | 275 | 41,389 | 3.93E-05 |
| GO:0071013 | cellular_component | catalytic step 2 spliceosome                                           | 18  | 10,676 | 29  | 41,389 | 4.10E-05 |
| GO:0006144 | biological_process | purine nucleobase metabolic process                                    | 14  | 10,676 | 20  | 41,389 | 4.30E-05 |
| GO:0004527 | molecular_function | exonuclease activity                                                   | 13  | 10,676 | 18  | 41,389 | 4.88E-05 |
| GO:0005801 | cellular_component | cis-Golgi network                                                      | 10  | 10,676 | 12  | 41,389 | 5.03E-05 |
| GO:0009798 | biological_process | axis specification                                                     | 10  | 10,676 | 12  | 41,389 | 5.03E-05 |
| GO:0008202 | biological_process | steroid metabolic process                                              | 10  | 10,676 | 12  | 41,389 | 5.03E-05 |
| GO:0032781 | biological_process | positive regulation of ATPase activity                                 | 10  | 10,676 | 12  | 41,389 | 5.03E-05 |
| GO:0007338 | biological_process | single fertilization                                                   | 10  | 10,676 | 12  | 41,389 | 5.03E-05 |
| GO:0035098 | cellular_component | ESC/E(Z) complex                                                       | 10  | 10,676 | 12  | 41,389 | 5.03E-05 |
| GO:0001541 | biological_process | ovarian follicle development                                           | 11  | 10,676 | 14  | 41,389 | 5.44E-05 |
| GO:0002474 | biological_process | antigen processing and presentation of peptide antigen via MHC class I | 16  | 10,676 | 25  | 41,389 | 6.48E-05 |
| GO:0051289 | biological_process | protein homotetramerization                                            | 16  | 10,676 | 25  | 41,389 | 6.48E-05 |
| GO:0004931 | molecular_function | extracellular ATP-gated cation channel activity                        | 7   | 10,676 | 7   | 41,389 | 7.59E-05 |
| GO:0030127 | cellular_component | COPII vesicle coat                                                     | 7   | 10,676 | 7   | 41,389 | 7.59E-05 |
| GO:0010524 | biological_process | positive regulation of calcium ion transport into cytosol              | 7   | 10,676 | 7   | 41,389 | 7.59E-05 |

|            |                    |                                                                                  |    |        |     |        |          |
|------------|--------------------|----------------------------------------------------------------------------------|----|--------|-----|--------|----------|
| GO:0033179 | cellular_component | proton-transporting V-type ATPase, V0 domain                                     | 7  | 10,676 | 7   | 41,389 | 7.59E-05 |
| GO:0045736 | biological_process | negative regulation of cyclin-dependent protein serine/threonine kinase activity | 7  | 10,676 | 7   | 41,389 | 7.59E-05 |
| GO:0007093 | biological_process | mitotic cell cycle checkpoint                                                    | 7  | 10,676 | 7   | 41,389 | 7.59E-05 |
| GO:0004176 | molecular_function | ATP-dependent peptidase activity                                                 | 7  | 10,676 | 7   | 41,389 | 7.59E-05 |
| GO:0015467 | molecular_function | activity                                                                         | 7  | 10,676 | 7   | 41,389 | 7.59E-05 |
| GO:0030983 | molecular_function | mismatched DNA binding                                                           | 7  | 10,676 | 7   | 41,389 | 7.59E-05 |
| GO:0051920 | molecular_function | peroxiredoxin activity                                                           | 7  | 10,676 | 7   | 41,389 | 7.59E-05 |
| GO:0045454 | biological_process | cell redox homeostasis                                                           | 36 | 10,676 | 78  | 41,389 | 8.17E-05 |
| GO:0004519 | molecular_function | endonuclease activity                                                            | 25 | 10,676 | 48  | 41,389 | 8.88E-05 |
| GO:0030133 | cellular_component | transport vesicle                                                                | 23 | 10,676 | 43  | 41,389 | 9.90E-05 |
| GO:0004252 | molecular_function | serine-type endopeptidase activity                                               | 82 | 10,676 | 220 | 41,389 | 1.12E-04 |
| GO:0004197 | molecular_function | cysteine-type endopeptidase activity                                             | 27 | 10,676 | 54  | 41,389 | 1.17E-04 |
| GO:0007623 | biological_process | circadian rhythm                                                                 | 13 | 10,676 | 19  | 41,389 | 1.18E-04 |
| GO:0006369 | biological_process | termination of RNA polymerase II transcription                                   | 13 | 10,676 | 19  | 41,389 | 1.18E-04 |
| GO:0015288 | molecular_function | porin activity                                                                   | 8  | 10,676 | 9   | 41,389 | 1.36E-04 |
| GO:0004415 | molecular_function | hyaluronoglucosaminidase activity                                                | 8  | 10,676 | 9   | 41,389 | 1.36E-04 |
| GO:0006241 | biological_process | CTP biosynthetic process                                                         | 8  | 10,676 | 9   | 41,389 | 1.36E-04 |
| GO:0005319 | molecular_function | lipid transporter activity                                                       | 8  | 10,676 | 9   | 41,389 | 1.36E-04 |
| GO:0006968 | biological_process | cellular defense response                                                        | 8  | 10,676 | 9   | 41,389 | 1.36E-04 |
| GO:0006839 | biological_process | mitochondrial transport                                                          | 8  | 10,676 | 9   | 41,389 | 1.36E-04 |
| GO:0006228 | biological_process | UTP biosynthetic process                                                         | 8  | 10,676 | 9   | 41,389 | 1.36E-04 |
| GO:0046934 | molecular_function | phosphatidylinositol-4,5-bisphosphate 3-kinase activity                          | 8  | 10,676 | 9   | 41,389 | 1.36E-04 |
| GO:0004550 | molecular_function | nucleoside diphosphate kinase activity                                           | 8  | 10,676 | 9   | 41,389 | 1.36E-04 |
| GO:0033077 | biological_process | T cell differentiation in thymus                                                 | 12 | 10,676 | 17  | 41,389 | 1.38E-04 |
| GO:0005506 | molecular_function | iron ion binding                                                                 | 46 | 10,676 | 109 | 41,389 | 1.39E-04 |
| GO:0004803 | molecular_function | transposase activity                                                             | 11 | 10,676 | 15  | 41,389 | 1.56E-04 |
| GO:0004602 | molecular_function | glutathione peroxidase activity                                                  | 11 | 10,676 | 15  | 41,389 | 1.56E-04 |
| GO:0008156 | biological_process | negative regulation of DNA replication                                           | 9  | 10,676 | 11  | 41,389 | 1.64E-04 |
| GO:0004089 | molecular_function | carbonate dehydratase activity                                                   | 9  | 10,676 | 11  | 41,389 | 1.64E-04 |
| GO:0009168 | biological_process | purine ribonucleoside monophosphate biosynthetic process                         | 9  | 10,676 | 11  | 41,389 | 1.64E-04 |
| GO:0008199 | molecular_function | ferric iron binding                                                              | 9  | 10,676 | 11  | 41,389 | 1.64E-04 |

|            |                    |                                                             |     |        |     |        |          |
|------------|--------------------|-------------------------------------------------------------|-----|--------|-----|--------|----------|
| GO:0008271 | molecular_function | secondary active sulfate transmembrane transporter activity | 9   | 10,676 | 11  | 41,389 | 1.64E-04 |
| GO:0000421 | cellular_component | autophagic vacuole membrane                                 | 9   | 10,676 | 11  | 41,389 | 1.64E-04 |
| GO:0031124 | biological_process | mRNA 3'-end processing                                      | 10  | 10,676 | 13  | 41,389 | 1.67E-04 |
| GO:0050660 | molecular_function | flavin adenine dinucleotide binding                         | 42  | 10,676 | 98  | 41,389 | 1.77E-04 |
| GO:0050821 | biological_process | protein stabilization                                       | 24  | 10,676 | 47  | 41,389 | 1.82E-04 |
| GO:0006313 | biological_process | transposition, DNA-mediated                                 | 14  | 10,676 | 22  | 41,389 | 2.06E-04 |
| GO:0006260 | biological_process | DNA replication                                             | 62  | 10,676 | 160 | 41,389 | 2.14E-04 |
| GO:0030176 | cellular_component | integral component of endoplasmic reticulum membrane        | 30  | 10,676 | 64  | 41,389 | 2.21E-04 |
| GO:0051258 | biological_process | protein polymerization                                      | 16  | 10,676 | 27  | 41,389 | 2.39E-04 |
| GO:0009881 | molecular_function | photoreceptor activity                                      | 23  | 10,676 | 45  | 41,389 | 2.43E-04 |
| GO:0007126 | biological_process | meiotic nuclear division                                    | 23  | 10,676 | 45  | 41,389 | 2.43E-04 |
| GO:0009331 | cellular_component | glycerol-3-phosphate dehydrogenase complex                  | 6   | 10,676 | 6   | 41,389 | 2.94E-04 |
| GO:0006646 | biological_process | phosphatidylethanolamine biosynthetic process               | 6   | 10,676 | 6   | 41,389 | 2.94E-04 |
| GO:0007342 | biological_process | fusion of sperm to egg plasma membrane                      | 6   | 10,676 | 6   | 41,389 | 2.94E-04 |
| GO:0000375 | biological_process | RNA splicing, via transesterification reactions             | 6   | 10,676 | 6   | 41,389 | 2.94E-04 |
| GO:0032784 | biological_process | regulation of DNA-templated transcription, elongation       | 6   | 10,676 | 6   | 41,389 | 2.94E-04 |
| GO:0051881 | biological_process | regulation of mitochondrial membrane potential              | 6   | 10,676 | 6   | 41,389 | 2.94E-04 |
| GO:0006271 | biological_process | DNA strand elongation involved in DNA replication           | 6   | 10,676 | 6   | 41,389 | 2.94E-04 |
| GO:0006536 | biological_process | glutamate metabolic process                                 | 6   | 10,676 | 6   | 41,389 | 2.94E-04 |
| GO:0045861 | biological_process | negative regulation of proteolysis                          | 6   | 10,676 | 6   | 41,389 | 2.94E-04 |
| GO:0043249 | biological_process | erythrocyte maturation                                      | 6   | 10,676 | 6   | 41,389 | 2.94E-04 |
| GO:0008967 | molecular_function | phosphoglycolate phosphatase activity                       | 6   | 10,676 | 6   | 41,389 | 2.94E-04 |
| GO:0006703 | biological_process | estrogen biosynthetic process                               | 6   | 10,676 | 6   | 41,389 | 2.94E-04 |
| GO:0008276 | molecular_function | protein methyltransferase activity                          | 6   | 10,676 | 6   | 41,389 | 2.94E-04 |
| GO:0070328 | biological_process | triglyceride homeostasis                                    | 6   | 10,676 | 6   | 41,389 | 2.94E-04 |
| GO:0006979 | biological_process | response to oxidative stress                                | 39  | 10,676 | 91  | 41,389 | 2.95E-04 |
| GO:0040007 | biological_process | growth                                                      | 25  | 10,676 | 51  | 41,389 | 3.07E-04 |
| GO:0031418 | molecular_function | L-ascorbic acid binding                                     | 15  | 10,676 | 25  | 41,389 | 3.10E-04 |
| GO:0010494 | cellular_component | cytoplasmic stress granule                                  | 12  | 10,676 | 18  | 41,389 | 3.17E-04 |
| GO:0003964 | molecular_function | RNA-directed DNA polymerase activity                        | 22  | 10,676 | 43  | 41,389 | 3.24E-04 |
| GO:0006508 | biological_process | proteolysis                                                 | 265 | 10,676 | 856 | 41,389 | 3.49E-04 |
| GO:0008406 | biological_process | gonad development                                           | 11  | 10,676 | 16  | 41,389 | 3.83E-04 |

|            |                    |                                                                                                 |    |        |     |        |          |
|------------|--------------------|-------------------------------------------------------------------------------------------------|----|--------|-----|--------|----------|
| GO:0043507 | biological_process | positive regulation of JUN kinase activity                                                      | 11 | 10,676 | 16  | 41,389 | 3.83E-04 |
| GO:0005528 | molecular_function | FK506 binding                                                                                   | 11 | 10,676 | 16  | 41,389 | 3.83E-04 |
| GO:0006417 | biological_process | regulation of translation                                                                       | 40 | 10,676 | 95  | 41,389 | 3.87E-04 |
| GO:0009615 | biological_process | response to virus                                                                               | 24 | 10,676 | 49  | 41,389 | 4.09E-04 |
| GO:0046983 | molecular_function | protein dimerization activity                                                                   | 58 | 10,676 | 151 | 41,389 | 4.37E-04 |
| GO:0045579 | biological_process | positive regulation of B cell differentiation                                                   | 7  | 10,676 | 8   | 41,389 | 4.70E-04 |
| GO:0004952 | molecular_function | dopamine neurotransmitter receptor activity                                                     | 7  | 10,676 | 8   | 41,389 | 4.70E-04 |
| GO:0012507 | cellular_component | ER to Golgi transport vesicle membrane                                                          | 7  | 10,676 | 8   | 41,389 | 4.70E-04 |
| GO:0016620 | molecular_function | oxidoreductase activity, acting on the aldehyde or oxo group of donors, NAD or NADP as acceptor | 7  | 10,676 | 8   | 41,389 | 4.70E-04 |
| GO:0048038 | molecular_function | quinone binding                                                                                 | 7  | 10,676 | 8   | 41,389 | 4.70E-04 |
| GO:0006297 | biological_process | nucleotide-excision repair, DNA gap filling                                                     | 7  | 10,676 | 8   | 41,389 | 4.70E-04 |
| GO:0042761 | biological_process | very long-chain fatty acid biosynthetic process                                                 | 7  | 10,676 | 8   | 41,389 | 4.70E-04 |
| GO:0000178 | cellular_component | exosome (RNase complex)                                                                         | 7  | 10,676 | 8   | 41,389 | 4.70E-04 |
| GO:0008121 | molecular_function | ubiquinol-cytochrome-c reductase activity                                                       | 7  | 10,676 | 8   | 41,389 | 4.70E-04 |
| GO:0008308 | molecular_function | voltage-gated anion channel activity                                                            | 7  | 10,676 | 8   | 41,389 | 4.70E-04 |
| GO:0016607 | cellular_component | nuclear speck                                                                                   | 71 | 10,676 | 193 | 41,389 | 4.79E-04 |
| GO:0003746 | molecular_function | translation elongation factor activity                                                          | 22 | 10,676 | 44  | 41,389 | 4.91E-04 |
| GO:0006103 | biological_process | 2-oxoglutarate metabolic process                                                                | 9  | 10,676 | 12  | 41,389 | 5.04E-04 |
| GO:0006468 | biological_process | protein phosphorylation                                                                         | 27 | 10,676 | 58  | 41,389 | 5.15E-04 |
| GO:0015078 | molecular_function | hydrogen ion transmembrane transporter activity                                                 | 13 | 10,676 | 21  | 41,389 | 5.16E-04 |
| GO:0070469 | cellular_component | respiratory chain                                                                               | 13 | 10,676 | 21  | 41,389 | 5.16E-04 |
| GO:0000245 | biological_process | spliceosomal complex assembly                                                                   | 8  | 10,676 | 10  | 41,389 | 5.24E-04 |
| GO:0048662 | biological_process | negative regulation of smooth muscle cell proliferation                                         | 8  | 10,676 | 10  | 41,389 | 5.24E-04 |
| GO:0046930 | cellular_component | pore complex                                                                                    | 8  | 10,676 | 10  | 41,389 | 5.24E-04 |
| GO:0060027 | biological_process | convergent extension involved in gastrulation                                                   | 8  | 10,676 | 10  | 41,389 | 5.24E-04 |
| GO:0043488 | biological_process | regulation of mRNA stability                                                                    | 8  | 10,676 | 10  | 41,389 | 5.24E-04 |
| GO:0006913 | biological_process | nucleocytoplasmic transport                                                                     | 8  | 10,676 | 10  | 41,389 | 5.24E-04 |
| GO:0015935 | cellular_component | small ribosomal subunit                                                                         | 8  | 10,676 | 10  | 41,389 | 5.24E-04 |
| GO:0006749 | biological_process | glutathione metabolic process                                                                   | 8  | 10,676 | 10  | 41,389 | 5.24E-04 |
| GO:0017091 | molecular_function | AU-rich element binding                                                                         | 8  | 10,676 | 10  | 41,389 | 5.24E-04 |
| GO:0016829 | molecular_function | lyase activity                                                                                  | 8  | 10,676 | 10  | 41,389 | 5.24E-04 |

|            |                    |                                       |    |        |    |        |          |
|------------|--------------------|---------------------------------------|----|--------|----|--------|----------|
| GO:0017046 | molecular_function | peptide hormone binding               | 8  | 10,676 | 10 | 41,389 | 5.24E-04 |
| GO:0006520 | biological_process | cellular amino acid metabolic process | 15 | 10,676 | 26 | 41,389 | 5.59E-04 |
| GO:0006278 | biological_process | RNA-dependent DNA replication         | 21 | 10,676 | 42 | 41,389 | 6.55E-04 |
| GO:0006606 | biological_process | protein import into nucleus           | 12 | 10,676 | 19 | 41,389 | 6.58E-04 |
| GO:0008654 | biological_process | phospholipid biosynthetic process     | 23 | 10,676 | 48 | 41,389 | 7.94E-04 |
| GO:0007030 | biological_process | Golgi organization                    | 11 | 10,676 | 17 | 41,389 | 8.32E-04 |
| GO:0043015 | molecular_function | gamma-tubulin binding                 | 11 | 10,676 | 17 | 41,389 | 8.32E-04 |
| GO:0030902 | biological_process | hindbrain development                 | 17 | 10,676 | 32 | 41,389 | 8.80E-04 |
| GO:0045768 | biological_process | positive regulation of anti-apoptosis | 15 | 10,676 | 27 | 41,389 | 9.58E-04 |
| GO:0007498 | biological_process | mesoderm development                  | 13 | 10,676 | 22 | 41,389 | 9.63E-04 |

---
