# Supplementary material for: The integrated analysis of RNA-seq and microRNA-seq depicts miRNA-mRNA networks involved in Japanese flounder (Paralichthys olivaceus) albinism
Source: PubMed Central journal article supplement (PMC5544202; doi:10.1371/journal.pone.0181761), 2017-08-04
Supplement: pone.0181761.s019.pdf [file pone.0181761.s019.pdf]

**S15 Table. The significant enrichment of KEGG pathways for target genes of miRNAs ( $p \leq 0.001$ ).**

| Pathway ID | Pathway description                          | S gene number | TS gene number | B gene number | TB gene number | Pvalue of Fisher's Exact |
|------------|----------------------------------------------|---------------|----------------|---------------|----------------|--------------------------|
| ko03010    | Ribosome                                     | 74            | 4,507          | 108           | 19,272         | 2.61E-23                 |
| ko00350    | Tyrosine metabolism                          | 59            | 4,507          | 78            | 19,272         | 2.18E-22                 |
| ko00983    | Drug metabolism - other enzymes              | 46            | 4,507          | 54            | 19,272         | 1.04E-21                 |
| ko00140    | Steroid hormone biosynthesis                 | 44            | 4,507          | 51            | 19,272         | 2.79E-21                 |
| ko00190    | Oxidative phosphorylation                    | 81            | 4,507          | 132           | 19,272         | 1.03E-20                 |
| ko00860    | Porphyrin and chlorophyll metabolism         | 38            | 4,507          | 45            | 19,272         | 7.00E-18                 |
| ko00520    | Amino sugar and nucleotide sugar metabolism  | 54            | 4,507          | 78            | 19,272         | 1.06E-17                 |
| ko03320    | PPAR signaling pathway                       | 80            | 4,507          | 142           | 19,272         | 2.50E-17                 |
| ko00100    | Steroid biosynthesis                         | 28            | 4,507          | 30            | 19,272         | 5.25E-16                 |
| ko00010    | Glycolysis / Gluconeogenesis                 | 66            | 4,507          | 112           | 19,272         | 7.09E-16                 |
| ko00480    | Glutathione metabolism                       | 49            | 4,507          | 72            | 19,272         | 1.02E-15                 |
| ko00982    | Drug metabolism - cytochrome P450            | 37            | 4,507          | 48            | 19,272         | 5.39E-15                 |
| ko00240    | Pyrimidine metabolism                        | 93            | 4,507          | 189           | 19,272         | 7.44E-15                 |
| ko00380    | Tryptophan metabolism                        | 44            | 4,507          | 65            | 19,272         | 4.01E-14                 |
| ko04620    | Toll-like receptor signaling pathway         | 80            | 4,507          | 158           | 19,272         | 7.67E-14                 |
| ko00980    | Metabolism of xenobiotics by cytochrome P450 | 35            | 4,507          | 47            | 19,272         | 1.79E-13                 |
| ko00040    | Pentose and glucuronate interconversions     | 24            | 4,507          | 27            | 19,272         | 9.36E-13                 |
| ko05012    | Parkinson's disease                          | 92            | 4,507          | 199           | 19,272         | 1.08E-12                 |
| ko00830    | Retinol metabolism                           | 50            | 4,507          | 84            | 19,272         | 1.32E-12                 |
| ko05140    | Leishmaniasis                                | 49            | 4,507          | 82            | 19,272         | 1.81E-12                 |
| ko00632    | Benzoate degradation via CoA ligation        | 24            | 4,507          | 28            | 19,272         | 5.09E-12                 |
| ko04142    | Lysosome                                     | 123           | 4,507          | 300           | 19,272         | 6.73E-12                 |
| ko04612    | Antigen processing and presentation          | 36            | 4,507          | 54            | 19,272         | 1.67E-11                 |
| ko04744    | Phototransduction                            | 43            | 4,507          | 72            | 19,272         | 4.20E-11                 |
| ko04111    | Cell cycle - yeast                           | 66            | 4,507          | 134           | 19,272         | 5.45E-11                 |
| ko00051    | Fructose and mannose metabolism              | 52            | 4,507          | 96            | 19,272         | 6.78E-11                 |
| ko04130    | SNARE interactions in vesicular transport    | 37            | 4,507          | 60            | 19,272         | 2.60E-10                 |
| ko04146    | Peroxisome                                   | 49            | 4,507          | 91            | 19,272         | 3.15E-10                 |

|         |                                              |    |       |     |        |          |
|---------|----------------------------------------------|----|-------|-----|--------|----------|
| ko00770 | Pantothenate and CoA biosynthesis            | 18 | 4,507 | 20  | 19,272 | 4.92E-10 |
| ko00030 | Pentose phosphate pathway                    | 31 | 4,507 | 48  | 19,272 | 1.41E-09 |
| ko00590 | Arachidonic acid metabolism                  | 39 | 4,507 | 68  | 19,272 | 1.76E-09 |
| ko00310 | Lysine degradation                           | 57 | 4,507 | 117 | 19,272 | 1.85E-09 |
| ko00500 | Starch and sucrose metabolism                | 49 | 4,507 | 96  | 19,272 | 3.48E-09 |
| ko04140 | Regulation of autophagy                      | 20 | 4,507 | 25  | 19,272 | 3.52E-09 |
| ko00624 | 1- and 2-Methylnaphthalene degradation       | 17 | 4,507 | 20  | 19,272 | 9.89E-09 |
| ko00071 | Fatty acid metabolism                        | 40 | 4,507 | 75  | 19,272 | 1.88E-08 |
| ko04740 | Olfactory transduction                       | 83 | 4,507 | 203 | 19,272 | 1.98E-08 |
| ko04950 | Maturity onset diabetes of the young         | 30 | 4,507 | 50  | 19,272 | 3.17E-08 |
| ko05340 | Primary immunodeficiency                     | 20 | 4,507 | 27  | 19,272 | 3.57E-08 |
| ko05320 | Autoimmune thyroid disease                   | 16 | 4,507 | 19  | 19,272 | 3.62E-08 |
| ko00531 | Glycosaminoglycan degradation                | 29 | 4,507 | 49  | 19,272 | 8.23E-08 |
| ko04610 | Complement and coagulation cascades          | 55 | 4,507 | 123 | 19,272 | 1.46E-07 |
| ko04622 | RIG-I-like receptor signaling pathway        | 42 | 4,507 | 85  | 19,272 | 1.47E-07 |
| ko00360 | Phenylalanine metabolism                     | 21 | 4,507 | 31  | 19,272 | 1.95E-07 |
| ko00450 | Selenoamino acid metabolism                  | 35 | 4,507 | 67  | 19,272 | 2.82E-07 |
| ko00260 | Glycine, serine and threonine metabolism     | 35 | 4,507 | 67  | 19,272 | 2.82E-07 |
| ko00920 | Sulfur metabolism                            | 13 | 4,507 | 15  | 19,272 | 3.98E-07 |
| ko00790 | Folate biosynthesis                          | 15 | 4,507 | 19  | 19,272 | 4.87E-07 |
| ko04672 | Intestinal immune network for IgA production | 15 | 4,507 | 19  | 19,272 | 4.87E-07 |
| ko00053 | Ascorbate and aldarate metabolism            | 22 | 4,507 | 35  | 19,272 | 7.10E-07 |
| ko00052 | Galactose metabolism                         | 38 | 4,507 | 78  | 19,272 | 8.94E-07 |
| ko00740 | Riboflavin metabolism                        | 22 | 4,507 | 36  | 19,272 | 1.42E-06 |
| ko00511 | Other glycan degradation                     | 15 | 4,507 | 20  | 19,272 | 1.52E-06 |
| ko05310 | Asthma                                       | 9  | 4,507 | 9   | 19,272 | 2.08E-06 |
| ko00710 | Carbon fixation in photosynthetic organisms  | 25 | 4,507 | 45  | 19,272 | 3.25E-06 |
| ko00120 | Primary bile acid biosynthesis               | 16 | 4,507 | 23  | 19,272 | 3.41E-06 |
| ko03018 | RNA degradation                              | 15 | 4,507 | 21  | 19,272 | 4.17E-06 |
| ko00750 | Vitamin B6 metabolism                        | 10 | 4,507 | 11  | 19,272 | 4.21E-06 |
| ko00460 | Cyanoamino acid metabolism                   | 18 | 4,507 | 28  | 19,272 | 4.66E-06 |
| ko00903 | Limonene and pinene degradation              | 22 | 4,507 | 38  | 19,272 | 5.05E-06 |

|         |                                                         |     |       |     |        |          |
|---------|---------------------------------------------------------|-----|-------|-----|--------|----------|
| ko00340 | Histidine metabolism                                    | 28  | 4,507 | 54  | 19,272 | 5.21E-06 |
| ko04621 | NOD-like receptor signaling pathway                     | 34  | 4,507 | 71  | 19,272 | 5.38E-06 |
| ko00642 | Ethylbenzene degradation                                | 11  | 4,507 | 13  | 19,272 | 5.47E-06 |
| ko05330 | Allograft rejection                                     | 11  | 4,507 | 13  | 19,272 | 5.47E-06 |
| ko02020 | Two-component system                                    | 11  | 4,507 | 13  | 19,272 | 5.47E-06 |
| ko00521 | Streptomycin biosynthesis                               | 13  | 4,507 | 17  | 19,272 | 5.55E-06 |
| ko04115 | p53 signaling pathway                                   | 71  | 4,507 | 188 | 19,272 | 6.38E-06 |
| ko00410 | beta-Alanine metabolism                                 | 23  | 4,507 | 41  | 19,272 | 6.43E-06 |
| ko00281 | Geraniol degradation                                    | 8   | 4,507 | 8   | 19,272 | 8.90E-06 |
| ko00601 | Glycosphingolipid biosynthesis - lacto and neolacto ser | 30  | 4,507 | 61  | 19,272 | 9.71E-06 |
| ko00760 | Nicotinate and nicotinamide metabolism                  | 27  | 4,507 | 53  | 19,272 | 1.17E-05 |
| ko00563 | Glycosylphosphatidylinositol                            | 19  | 4,507 | 32  | 19,272 | 1.36E-05 |
| ko00400 | Phenylalanine, tyrosine and tryptophan biosynthesis     | 9   | 4,507 | 10  | 19,272 | 1.64E-05 |
| ko00603 | Glycosphingolipid biosynthesis - globo series           | 12  | 4,507 | 16  | 19,272 | 1.83E-05 |
| ko05130 | Pathogenic Escherichia coli infection                   | 61  | 4,507 | 160 | 19,272 | 1.98E-05 |
| ko00960 | Tropane, piperidine and pyridine alkaloid biosynthesis  | 14  | 4,507 | 21  | 19,272 | 3.03E-05 |
| ko04614 | Renin-angiotensin system                                | 15  | 4,507 | 24  | 19,272 | 4.82E-05 |
| ko00130 | Ubiquinone and other terpenoid-quinone biosynthesis     | 8   | 4,507 | 9   | 19,272 | 6.35E-05 |
| ko05210 | Colorectal cancer                                       | 76  | 4,507 | 217 | 19,272 | 6.52E-05 |
| ko00430 | Taurine and hypotaurine metabolism                      | 14  | 4,507 | 22  | 19,272 | 6.53E-05 |
| ko03440 | Homologous recombination                                | 23  | 4,507 | 46  | 19,272 | 7.52E-05 |
| ko04110 | Cell cycle                                              | 115 | 4,507 | 358 | 19,272 | 8.76E-05 |
| ko00280 | Valine, leucine and isoleucine degradation              | 37  | 4,507 | 89  | 19,272 | 1.04E-04 |
| ko00680 | Methane metabolism                                      | 12  | 4,507 | 18  | 19,272 | 1.15E-04 |
| ko04623 | Cytosolic DNA-sensing pathway                           | 20  | 4,507 | 39  | 19,272 | 1.40E-04 |
| ko04210 | Apoptosis                                               | 76  | 4,507 | 222 | 19,272 | 1.51E-04 |
| ko03020 | RNA polymerase                                          | 29  | 4,507 | 66  | 19,272 | 1.80E-04 |
| ko03410 | Base excision repair                                    | 26  | 4,507 | 57  | 19,272 | 1.84E-04 |
| ko00950 | Isoquinoline alkaloid biosynthesis                      | 10  | 4,507 | 14  | 19,272 | 1.88E-04 |
| ko03040 | Spliceosome                                             | 19  | 4,507 | 37  | 19,272 | 2.01E-04 |
| ko00930 | Caprolactam degradation                                 | 8   | 4,507 | 10  | 19,272 | 2.52E-04 |
| ko05332 | Graft-versus-host disease                               | 8   | 4,507 | 10  | 19,272 | 2.52E-04 |

|         |                                                 |     |       |       |        |          |
|---------|-------------------------------------------------|-----|-------|-------|--------|----------|
| ko00604 | Glycosphingolipid biosynthesis - ganglio series | 18  | 4,507 | 35    | 19,272 | 2.87E-04 |
| ko00600 | Sphingolipid metabolism                         | 41  | 4,507 | 106   | 19,272 | 2.99E-04 |
| ko05142 | Chagas disease                                  | 90  | 4,507 | 277   | 19,272 | 3.17E-04 |
| ko05212 | Pancreatic cancer                               | 74  | 4,507 | 220   | 19,272 | 3.34E-04 |
| ko00626 | Naphthalene and anthracene degradation          | 12  | 4,507 | 20    | 19,272 | 4.85E-04 |
| ko04080 | Neuroactive ligand-receptor interaction         | 312 | 4,507 | 1,138 | 19,272 | 6.30E-04 |
| ko04060 | Cytokine-cytokine receptor interaction          | 87  | 4,507 | 272   | 19,272 | 6.90E-04 |
| ko00232 | Caffeine metabolism                             | 5   | 4,507 | 5     | 19,272 | 6.98E-04 |
| ko04710 | Circadian rhythm - mammal                       | 12  | 4,507 | 21    | 19,272 | 8.91E-04 |
| ko00330 | Arginine and proline metabolism                 | 52  | 4,507 | 149   | 19,272 | 9.43E-04 |
| ko04670 | Leucyte transendothelial migration              | 157 | 4,507 | 538   | 19,272 | 9.67E-04 |

---
