# Supplementary material for: The integrated analysis of RNA-seq and microRNA-seq depicts miRNA-mRNA networks involved in Japanese flounder (Paralichthys olivaceus) albinism
Source: PubMed Central journal article supplement (PMC5544202; doi:10.1371/journal.pone.0181761), 2017-08-04
Supplement: pone.0181761.s021.pdf [file pone.0181761.s021.pdf]

**S17 Table. The comparison of expression profiles between miRNAs and the predicted mRNA targets in PO\_alb versus PO\_con.**

| <b>mRNA ID</b> | <b>mRNA symbol</b> | <b>mRNA annotation</b>                            | <b>mRNA profiles</b> | <b>miRNAs</b>             | <b>miRNA profiles</b> |
|----------------|--------------------|---------------------------------------------------|----------------------|---------------------------|-----------------------|
| GS_000169      | RGS8               | Regulator of G-protein signaling 8                | down                 | dre-miR-25-3p             | up                    |
| GS_000169      | RGS8               | Regulator of G-protein signaling 8                | down                 | xtr-miR-92a_R+4           | up                    |
| GS_000622      | MUCM               | Ig mu chain C region membrane-bound form          | down                 | mmu-miR-143-5p_R+2        | up                    |
| GS_000622      | MUCM               | Ig mu chain C region membrane-bound form          | down                 | xtr-miR-222_R-1           | up                    |
| GS_000805      | -                  | -                                                 | down                 | mmu-miR-143-5p_R+2        | up                    |
| GS_000805      | -                  | -                                                 | down                 | ola-miR-30c_1ss21AG       | up                    |
| GS_000869      | MAR1               | Melanoma antigen recognized by T-cells 1          | down                 | dre-miR-25-3p             | up                    |
| GS_000869      | MAR1               | Melanoma antigen recognized by T-cells 1          | down                 | xtr-miR-92a_R+4           | up                    |
| GS_001154      | KIF5C              | Kinesin heavy chain isoform 5C                    | down                 | hsa-miR-27a-3p_R+1        | up                    |
| GS_001664      | CYTSA              | Cytospin-A                                        | down                 | hsa-miR-205-5p_R+2        | up                    |
| GS_001664      | CYTSA              | Cytospin-A                                        | down                 | mmu-miR-143-5p_R+2        | up                    |
| GS_001664      | CYTSA              | Cytospin-A                                        | down                 | tni-miR-205               | up                    |
| GS_002043      | MITF               | Microphthalmia-associated transcription factor    | down                 | hsa-miR-27a-3p_R+1        | up                    |
| GS_002681      | DRD5L              | D(5)-like dopamine receptor                       | down                 | hsa-miR-27a-3p_R+1        | up                    |
| GS_002818      | POL                | Gag-Pol polyprotein                               | down                 | hsa-miR-27a-3p_R+1        | up                    |
| GS_003590      | PMEL               | Melanocyte protein PMEL                           | down                 | hsa-miR-27a-3p_R+1        | up                    |
| GS_004597      | MREG               | Melanoregulin                                     | down                 | ola-miR-30c_1ss21AG       | up                    |
| GS_004597      | MREG               | Melanoregulin                                     | down                 | xtr-miR-222_R-1           | up                    |
| GS_005047      | F123A              | Perilipin-2                                       | down                 | pol-miR-199a-5p_R+1       | up                    |
| GS_005575      | NCF1               | Neutrophil cytosol factor 1                       | down                 | hsa-miR-27a-3p_R+1        | up                    |
| GS_005871      | REP15              | Rab15 effector protein                            | down                 | hsa-miR-205-5p_R+2        | up                    |
| GS_005871      | REP15              | Rab15 effector protein                            | down                 | mmu-miR-143-5p_R+2        | up                    |
| GS_005871      | REP15              | Rab15 effector protein                            | down                 | tni-miR-205               | up                    |
| GS_005902      | GCH1               | GTP cyclohydrolase 1                              | down                 | mmu-miR-143-5p_R+2        | up                    |
| GS_005902      | GCH1               | GTP cyclohydrolase 1                              | down                 | xtr-miR-222_R-1           | up                    |
| GS_006243      | S6A13              | Sodium- and chloride-dependent GABA transporter 2 | down                 | ola-miR-30c_1ss21AG       | up                    |
| GS_007375      | S22A7              | Solute carrier family 22 member 7                 | down                 | oan-miR-139-3p_R-1_1ss8AC | up                    |
| GS_007378      | MC1R               | Melanocyte-stimulating hormone receptor           | down                 | dre-miR-25-3p             | up                    |
| GS_007378      | MC1R               | Melanocyte-stimulating hormone receptor           | down                 | hsa-miR-205-5p_R+2        | up                    |
| GS_007378      | MC1R               | Melanocyte-stimulating hormone receptor           | down                 | hsa-miR-27a-3p_R+1        | up                    |
| GS_007378      | MC1R               | Melanocyte-stimulating hormone receptor           | down                 | tni-miR-205               | up                    |
| GS_007378      | MC1R               | Melanocyte-stimulating hormone receptor           | down                 | xtr-miR-92a_R+4           | up                    |

|           |       |                                                                      |      |                           |    |
|-----------|-------|----------------------------------------------------------------------|------|---------------------------|----|
| GS_008156 | CHLE  | Melanocyte-stimulating hormone receptor                              | down | pol-miR-199a-5p_R+1       | up |
| GS_008205 | FXI1C | Forkhead box protein I1c                                             | down | hsa-miR-27a-3p_R+1        | up |
| GS_008205 | FXI1C | Forkhead box protein I1c                                             | down | oan-miR-139-3p_R-1_1ss8AC | up |
| GS_008220 | AHNAK | Neuroblast differentiation-associated protein AHNAK                  | down | ola-miR-30c_1ss21AG       | up |
| GS_008748 | GCH1  | GTP cyclohydrolase 1                                                 | down | hsa-miR-27a-3p_R+1        | up |
| GS_009601 | PLD3A | 1-phosphatidylinositol 4,5-bisphosphate phosphodiesterase delta-3-A  | down | ola-miR-30c_1ss21AG       | up |
| GS_010316 | GPR61 | Probable G-protein coupled receptor 61                               | down | hsa-miR-205-5p_R+2        | up |
| GS_010316 | GPR61 | Probable G-protein coupled receptor 61                               | down | mmu-miR-143-5p_R+2        | up |
| GS_010316 | GPR61 | Probable G-protein coupled receptor 61                               | down | tmi-miR-205               | up |
| GS_010330 | CAH6  | Carbonic anhydrase 6                                                 | down | hsa-miR-205-5p_R+2        | up |
| GS_010330 | CAH6  | Carbonic anhydrase 6                                                 | down | tmi-miR-205               | up |
| GS_010503 | -     | -                                                                    | down | pol-miR-199a-5p_R+1       | up |
| GS_011013 | HEBP2 | Heme-binding protein 2                                               | down | xtr-miR-222_R-1           | up |
| GS_012545 | K1C17 | Keratin, type I cytoskeletal 17                                      | down | mmu-miR-143-5p_R+2        | up |
| GS_013312 | DFP   | Putative defense protein Hdd11-like                                  | down | mmu-miR-143-5p_R+2        | up |
| GS_013586 | RASEF | Ras and EF-hand domain-containing protein                            | down | dre-miR-25-3p             | up |
| GS_013586 | RASEF | Ras and EF-hand domain-containing protein                            | down | xtr-miR-92a_R+4           | up |
| GS_014384 | RETST | Putative all-trans-retinol 13,14-reductase                           | down | xtr-miR-222_R-1           | up |
| GS_014490 | XDH   | Xanthine dehydrogenase/oxidase                                       | down | oan-miR-139-3p_R-1_1ss8AC | up |
| GS_014594 | FCAMR | High affinity immunoglobulin alpha and immunoglobulin mu Fc receptor | down | mmu-miR-143-5p_R+2        | up |
| GS_014776 | PCD10 | Protocadherin-10                                                     | down | ola-miR-30c_1ss21AG       | up |
| GS_015155 | PCDH9 | Protocadherin-9                                                      | down | xtr-miR-92a_R+4           | up |
| GS_015243 | VTCN1 | V-set domain-containing T-cell activation inhibitor 1                | down | mmu-miR-143-5p_R+2        | up |
| GS_015779 | CA216 | UPF0500 protein C1orf216 homolog                                     | down | ola-miR-30c_1ss21AG       | up |
| GS_016285 | S10I  | Ictacalcin                                                           | down | hsa-miR-27a-3p_R+1        | up |
| GS_016285 | S10I  | Ictacalcin                                                           | down | ola-miR-30c_1ss21AG       | up |
| GS_016285 | S10I  | Ictacalcin                                                           | down | pol-miR-199a-5p_R+1       | up |
| GS_016685 | MSMB  | Beta-microseminoprotein                                              | down | ola-miR-30c_1ss21AG       | up |
| GS_016790 | AHI1  | Joubertin                                                            | down | hsa-miR-27a-3p_R+1        | up |
| GS_017127 | CCD18 | Coiled-coil domain-containing protein 18                             | down | hsa-miR-205-5p_R+2        | up |
| GS_017127 | CCD18 | Coiled-coil domain-containing protein 18                             | down | tmi-miR-205               | up |
| GS_017738 | NPDC1 | Neural proliferation differentiation and control protein 1           | down | ola-miR-30c_1ss21AG       | up |
| GS_018226 | ES1   | ES1 protein homolog, mitochondrial                                   | down | pol-miR-199a-5p_R+1       | up |
| GS_018359 | EDNRB | Endothelin B receptor                                                | down | xtr-miR-222_R-1           | up |
| GS_018934 | RGR   | RPE-retinal G protein-coupled receptor                               | down | hsa-miR-27a-3p_R+1        | up |
| GS_019504 | TRPC2 | Short transient receptor potential channel 2                         | down | ola-miR-30c_1ss21AG       | up |

|           |         |                                                     |      |                                |      |
|-----------|---------|-----------------------------------------------------|------|--------------------------------|------|
| GS_019678 | MPDZ    | Multiple PDZ domain protein                         | down | dre-miR-25-3p                  | up   |
| GS_019678 | MPDZ    | Multiple PDZ domain protein                         | down | xtr-miR-92a_R+4                | up   |
| GS_019698 | MAP6    | Microtubule-associated protein 6 homolog            | down | pol-miR-199a-5p_R+1            | up   |
| GS_020150 | KINH    | Kinesin-1 heavy chain                               | down | hsa-miR-27a-3p_R+1             | up   |
| GS_020687 | TMEM130 | Transmembrane protein 130                           | down | xtr-miR-222_R-1                | up   |
| GS_020906 | BACE1   | Beta-secretase 1                                    | down | hsa-miR-27a-3p_R+1             | up   |
| GS_020906 | BACE1   | Beta-secretase 1                                    | down | pol-miR-199a-5p_R+1            | up   |
| GS_021037 | IL17REL | Putative interleukin-17 receptor E-like             | down | oan-miR-139-3p_R-1_1ss8AC      | up   |
| GS_021169 | NSG2    | Neuron-specific protein family member 2             | down | hsa-miR-205-5p_R+2             | up   |
| GS_021169 | NSG2    | Neuron-specific protein family member 2             | down | tni-miR-205                    | up   |
| GS_021359 | PANX3   | Pannexin-3                                          | down | hsa-miR-205-5p_R+2             | up   |
| GS_021359 | PANX3   | Pannexin-3                                          | down | tni-miR-205                    | up   |
| GS_000465 | CO1A2   | Collagen alpha-2(I) chain (Fragment)                | up   | dre-miR-203b-3p_L-1R+2_1ss11CT | down |
| GS_000465 | CO1A2   | Collagen alpha-2(I) chain (Fragment)                | up   | dre-miR-204-5p_R+2             | down |
| GS_001591 | NKX11   | NK1 transcription factor-related protein 1          | up   | dre-miR-18b-5p_1ss11TC         | down |
| GS_001591 | NKX11   | NK1 transcription factor-related protein 1          | up   | pma-miR-1c-3p_1ss2GT           | down |
| GS_002188 | AQP7    | Aquaporin-7                                         | up   | dre-miR-20a-3p_2ss7GA11GA      | down |
| GS_002994 | CRP     | C-reactive protein                                  | up   | ola-miR-135b_R+3               | down |
| GS_002994 | CRP     | C-reactive protein                                  | up   | PC-5p-43190_23                 | down |
| GS_002994 | CRP     | C-reactive protein                                  | up   | tni-miR-135b_R+1               | down |
| GS_003073 | HSP70   | Heat shock cognate 70 kDa protein                   | up   | dre-miR-203b-3p_L-1R+2_1ss11CT | down |
| GS_003073 | HSP70   | Heat shock cognate 70 kDa protein                   | up   | ola-miR-106a_R+2               | down |
| GS_004023 | ARF6    | ADP-ribosylation factor 6                           | up   | pma-miR-1c-3p_1ss2GT           | down |
| GS_006488 | P2RY8   | P2Y purinoceptor 8                                  | up   | dre-miR-203b-3p_L-1R+2_1ss11CT | down |
| GS_006488 | P2RY8   | P2Y purinoceptor 8                                  | up   | dre-miR-20a-3p_2ss7GA11GA      | down |
| GS_006975 | GLRK    | Probable glutamate receptor                         | up   | oan-miR-16b-5p_1ss22GA         | down |
| GS_006975 | GLRK    | Probable glutamate receptor                         | up   | ola-miR-16                     | down |
| GS_006975 | GLRK    | Probable glutamate receptor                         | up   | PC-5p-26963_57                 | down |
| GS_006975 | GLRK    | Probable glutamate receptor                         | up   | pma-miR-1c-3p_1ss2GT           | down |
| GS_006975 | GLRK    | Probable glutamate receptor                         | up   | tni-miR-15a_R-1                | down |
| GS_006975 | GLRK    | Probable glutamate receptor                         | up   | tni-miR-16_R-1                 | down |
| GS_007314 | GRN     | Granulins                                           | up   | dre-miR-20a-3p_2ss7GA11GA      | down |
| GS_007314 | GRN     | Granulins                                           | up   | PC-5p-43190_23                 | down |
| GS_007481 | KCC1G   | Calcium/calmodulin-dependent protein kinase type 1G | up   | ola-miR-106a_R+2               | down |
| GS_007697 | SOSD1   | Sclerostin domain-containing protein 1              | up   | ola-miR-205_L-1R+1_1ss20TA     | down |
| GS_008785 | CAH4    | Carbonic anhydrase 4                                | up   | dre-miR-203b-3p_L-1R+2_1ss11CT | down |
| GS_009467 | TNNT2   | Troponin T, cardiac muscle isoforms                 | up   | ola-miR-205_L-1R+1_1ss20TA     | down |

|           |        |                                                       |      |                                |      |
|-----------|--------|-------------------------------------------------------|------|--------------------------------|------|
| GS_009938 | DHB14  | 17-beta-hydroxysteroid dehydrogenase 14               | up   | dre-miR-203b-3p_L-1R+2_1ss11CT | down |
| GS_009938 | DHB14  | 17-beta-hydroxysteroid dehydrogenase 14               | up   | dre-miR-20a-3p_2ss7GA11GA      | down |
| GS_010174 | LYG    | Lysozyme g                                            | up   | dre-miR-203b-3p_L-1R+2_1ss11CT | down |
| GS_010268 | VEGFAA | Vascular endothelial growth factor A-A                | up   | oan-miR-16b-5p_1ss22GA         | down |
| GS_010268 | VEGFAA | Vascular endothelial growth factor A-A                | up   | ola-miR-16                     | down |
| GS_010268 | VEGFAA | Vascular endothelial growth factor A-A                | up   | PC-5p-26963_57                 | down |
| GS_010268 | VEGFAA | Vascular endothelial growth factor A-A                | up   | PC-5p-43190_23                 | down |
| GS_010268 | VEGFAA | Vascular endothelial growth factor A-A                | up   | tni-miR-15a_R-1                | down |
| GS_010268 | VEGFAA | Vascular endothelial growth factor A-A                | up   | tni-miR-16_R-1                 | down |
| GS_010525 | FABPI  | Fatty acid-binding protein, intestinal                | up   | PC-5p-26963_57                 | down |
| GS_012001 | PLIN2  | Perilipin-2                                           | up   | dre-miR-9-3p_R+1               | down |
| GS_013015 | PE2R3  | Prostaglandin E2 receptor EP3 subtype                 | up   | pma-miR-1c-3p_1ss2GT           | down |
| GS_013015 | PE2R3  | Prostaglandin E2 receptor EP3 subtype                 | up   | tni-miR-135b_R+1               | down |
| GS_014186 | MSLNL  | Mesothelin-like protein                               | up   | dre-miR-202-5p_R-1             | down |
| GS_014186 | MSLNL  | Mesothelin-like protein                               | up   | dre-miR-203b-3p_L-1R+2_1ss11CT | down |
| GS_014186 | MSLNL  | Mesothelin-like protein                               | up   | ola-miR-106a_R+2               | down |
| GS_014186 | MSLNL  | Mesothelin-like protein                               | up   | ola-miR-205_L-1R+1_1ss20TA     | down |
| GS_014186 | MSLNL  | Mesothelin-like protein                               | up   | PC-5p-26963_57                 | down |
| GS_014186 | MSLNL  | Mesothelin-like protein                               | up   | pma-miR-1c-3p_1ss2GT           | down |
| GS_015700 | DMBT1  | Deleted in malignant brain tumors 1 protein           | up   | dre-miR-202-5p_R-1             | down |
| GS_019550 | CXA3   | Gap junction alpha-3 protein                          | up   | oan-miR-16b-5p_1ss22GA         | down |
| GS_019550 | CXA3   | Gap junction alpha-3 protein                          | up   | ola-miR-16                     | down |
| GS_019550 | CXA3   | Gap junction alpha-3 protein                          | up   | tni-miR-15a_R-1                | down |
| GS_019550 | CXA3   | Gap junction alpha-3 protein                          | up   | tni-miR-16_R-1                 | down |
| GS_020318 | DESM   | Desmin                                                | up   | ola-miR-106a_R+2               | down |
| GS_000622 | MUCM   | Ig mu chain C region membrane-bound form              | down | ola-miR-106a_R+2               | down |
| GS_000805 | -      | -                                                     | down | ola-miR-205_L-1R+1_1ss20TA     | down |
| GS_000806 | -      | -                                                     | down | dre-miR-203b-3p_L-1R+2_1ss11CT | down |
| GS_000806 | -      | -                                                     | down | ola-miR-205_L-1R+1_1ss20TA     | down |
| GS_000869 | MAR1   | Melanoma antigen recognized by T-cells 1              | down | oan-miR-16b-5p_1ss22GA         | down |
| GS_000869 | MAR1   | Melanoma antigen recognized by T-cells 1              | down | ola-miR-135b_R+3               | down |
| GS_000869 | MAR1   | Melanoma antigen recognized by T-cells 1              | down | ola-miR-16                     | down |
| GS_000869 | MAR1   | Melanoma antigen recognized by T-cells 1              | down | tni-miR-135b_R+1               | down |
| GS_000869 | MAR1   | Melanoma antigen recognized by T-cells 1              | down | tni-miR-15a_R-1                | down |
| GS_000869 | MAR1   | Melanoma antigen recognized by T-cells 1              | down | tni-miR-16_R-1                 | down |
| GS_001154 | KIF5C  | Kinesin heavy chain isoform 5C                        | down | dre-miR-204-5p_R+2             | down |
| GS_001157 | ABP1   | Amiloride-sensitive amine oxidase [copper-containing] | down | dre-miR-204-5p_L+1             | down |

|           |       |                                                      |      |                                |      |
|-----------|-------|------------------------------------------------------|------|--------------------------------|------|
| GS_001664 | CYTSA | Cytospin-A                                           | down | dre-miR-203b-3p_L-1R+2_1ss11CT | down |
| GS_001664 | CYTSA | Cytospin-A                                           | down | ola-miR-106a_R+2               | down |
| GS_001783 | KNG   | Kininogen (Fragments)                                | down | dre-miR-203b-3p_L-1R+2_1ss11CT | down |
| GS_002043 | MITF  | Microphthalmia-associated transcription factor       | down | dre-miR-204-5p_R+2             | down |
| GS_002043 | MITF  | Microphthalmia-associated transcription factor       | down | PC-5p-46961_19                 | down |
| GS_002614 | GPR21 | Probable G-protein coupled receptor 21               | down | oan-miR-16b-5p_1ss22GA         | down |
| GS_002614 | GPR21 | Probable G-protein coupled receptor 21               | down | ola-miR-16                     | down |
| GS_002614 | GPR21 | Probable G-protein coupled receptor 21               | down | tni-miR-15a_R-1                | down |
| GS_002614 | GPR21 | Probable G-protein coupled receptor 21               | down | tni-miR-16_R-1                 | down |
| GS_002681 | DRD5L | D(5)-like dopamine receptor                          | down | dre-miR-203b-3p_L-1R+2_1ss11CT | down |
| GS_002681 | DRD5L | D(5)-like dopamine receptor                          | down | dre-miR-9-3p_R+1               | down |
| GS_002818 | POL   | Gag-Pol polyprotein                                  | down | oan-miR-16b-5p_1ss22GA         | down |
| GS_002818 | POL   | Gag-Pol polyprotein                                  | down | ola-miR-16                     | down |
| GS_002818 | POL   | Gag-Pol polyprotein                                  | down | tni-miR-15a_R-1                | down |
| GS_002818 | POL   | Gag-Pol polyprotein                                  | down | tni-miR-16_R-1                 | down |
| GS_003590 | PMEL  | Melanocyte protein PMEL                              | down | oan-miR-16b-5p_1ss22GA         | down |
| GS_003590 | PMEL  | Melanocyte protein PMEL                              | down | ola-miR-16                     | down |
| GS_003590 | PMEL  | Melanocyte protein PMEL                              | down | ola-miR-205_L-1R+1_1ss20TA     | down |
| GS_003590 | PMEL  | Melanocyte protein PMEL                              | down | tni-miR-15a_R-1                | down |
| GS_003590 | PMEL  | Melanocyte protein PMEL                              | down | tni-miR-16_R-1                 | down |
| GS_003635 | PDIA1 | Protein disulfide-isomerase                          | down | PC-5p-26963_57                 | down |
| GS_003739 | BDH   | D-beta-hydroxybutyrate dehydrogenase, mitochondrial  | down | dre-miR-203b-3p_L-1R+2_1ss11CT | down |
| GS_003739 | BDH   | D-beta-hydroxybutyrate dehydrogenase, mitochondrial  | down | PC-5p-43190_23                 | down |
| GS_003949 | S47A1 | Multidrug and toxin extrusion protein 1              | down | dre-miR-202-5p_R-1             | down |
| GS_004597 | MREG  | Melanoregulin                                        | down | ola-miR-16                     | down |
| GS_004597 | MREG  | Melanoregulin                                        | down | tni-miR-15a_R-1                | down |
| GS_004597 | MREG  | Melanoregulin                                        | down | tni-miR-16_R-1                 | down |
| GS_005047 | F123A | Perilipin-2                                          | down | ola-miR-205_L-1R+1_1ss20TA     | down |
| GS_005244 | -     | -                                                    | down | ola-miR-106a_R+2               | down |
| GS_005575 | NCF1  | Neutrophil cytosol factor 1                          | down | dre-miR-18b-5p_1ss11TC         | down |
| GS_005670 | EZRI  | Ezrin                                                | down | dre-miR-203b-3p_L-1R+2_1ss11CT | down |
| GS_005670 | EZRI  | Ezrin                                                | down | dre-miR-9-3p_R+1               | down |
| GS_005670 | EZRI  | Ezrin                                                | down | ola-miR-106a_R+2               | down |
| GS_005871 | REP15 | Rab15 effector protein                               | down | PC-5p-43190_23                 | down |
| GS_005903 | GCH1  | GTP cyclohydrolase 1                                 | down | pma-miR-1c-3p_1ss2GT           | down |
| GS_005905 | GILT  | Gamma-interferon-inducible lysosomal thiol reductase | down | oan-miR-16b-5p_1ss22GA         | down |
| GS_005905 | GILT  | Gamma-interferon-inducible lysosomal thiol reductase | down | ola-miR-16                     | down |

|           |       |                                                      |      |                                |      |
|-----------|-------|------------------------------------------------------|------|--------------------------------|------|
| GS_005905 | GILT  | Gamma-interferon-inducible lysosomal thiol reductase | down | tmi-miR-15a_R-1                | down |
| GS_005905 | GILT  | Gamma-interferon-inducible lysosomal thiol reductase | down | tmi-miR-16_R-1                 | down |
| GS_006243 | S6A13 | Sodium- and chloride-dependent GABA transporter 2    | down | dre-miR-203b-3p_L-1R+2_1ss11CT | down |
| GS_006243 | S6A13 | Sodium- and chloride-dependent GABA transporter 2    | down | oan-miR-16b-5p_1ss22GA         | down |
| GS_006243 | S6A13 | Sodium- and chloride-dependent GABA transporter 2    | down | ola-miR-16                     | down |
| GS_006243 | S6A13 | Sodium- and chloride-dependent GABA transporter 2    | down | tmi-miR-15a_R-1                | down |
| GS_006243 | S6A13 | Sodium- and chloride-dependent GABA transporter 2    | down | tmi-miR-16_R-1                 | down |
| GS_006323 | DLRB2 | Dynein light chain roadblock-type 2                  | down | dre-miR-204-5p_R+2             | down |
| GS_006323 | DLRB2 | Dynein light chain roadblock-type 2                  | down | oan-miR-16b-5p_1ss22GA         | down |
| GS_006323 | DLRB2 | Dynein light chain roadblock-type 2                  | down | ola-miR-16                     | down |
| GS_006323 | DLRB2 | Dynein light chain roadblock-type 2                  | down | tmi-miR-15a_R-1                | down |
| GS_006323 | DLRB2 | Dynein light chain roadblock-type 2                  | down | tmi-miR-16_R-1                 | down |
| GS_006925 | PGS1  | Biglycan                                             | down | dre-miR-204-5p_R+2             | down |
| GS_006925 | PGS1  | Biglycan                                             | down | dre-miR-20a-3p_2ss7GA11GA      | down |
| GS_007052 | DYR   | Viral dihydrofolate reductase                        | down | dre-miR-203b-3p_L-1R+2_1ss11CT | down |
| GS_007378 | MC1R  | Melanocyte-stimulating hormone receptor              | down | oan-miR-16b-5p_1ss22GA         | down |
| GS_007378 | MC1R  | Melanocyte-stimulating hormone receptor              | down | ola-miR-16                     | down |
| GS_007378 | MC1R  | Melanocyte-stimulating hormone receptor              | down | pma-miR-1c-3p_1ss2GT           | down |
| GS_007378 | MC1R  | Melanocyte-stimulating hormone receptor              | down | tmi-miR-15a_R-1                | down |
| GS_007378 | MC1R  | Melanocyte-stimulating hormone receptor              | down | tmi-miR-16_R-1                 | down |
| GS_007760 | CP26C | Cytochrome P450 26C1                                 | down | ola-miR-205_L-1R+1_1ss20TA     | down |
| GS_008156 | CHLE  | Cholinesterase                                       | down | dre-miR-20a-3p_2ss7GA11GA      | down |
| GS_008156 | CHLE  | Cholinesterase                                       | down | oan-miR-16b-5p_1ss22GA         | down |
| GS_008156 | CHLE  | Cholinesterase                                       | down | ola-miR-16                     | down |
| GS_008156 | CHLE  | Cholinesterase                                       | down | pma-miR-1c-3p_1ss2GT           | down |
| GS_008156 | CHLE  | Cholinesterase                                       | down | tmi-miR-15a_R-1                | down |
| GS_008156 | CHLE  | Cholinesterase                                       | down | tmi-miR-16_R-1                 | down |
| GS_008220 | AHNK  | Neuroblast differentiation-associated protein AHNAK  | down | dre-miR-203b-3p_L-1R+2_1ss11CT | down |
| GS_008287 | PRS35 | Inactive serine protease 35                          | down | dre-miR-9-3p_R+1               | down |
| GS_008590 | FICA  | Salmorin subunit A                                   | down | dre-miR-203b-3p_L-1R+2_1ss11CT | down |
| GS_008590 | FICA  | Salmorin subunit A                                   | down | dre-miR-20a-3p_2ss7GA11GA      | down |
| GS_008611 | ADRB1 | Beta-1 adrenergic receptor                           | down | dre-miR-204-5p_L+1             | down |
| GS_008748 | GCH1  | GTP cyclohydrolase 1                                 | down | dre-miR-202-5p_R-1             | down |
| GS_009046 | KITA  | Mast/stem cell growth factor receptor kita           | down | oan-miR-16b-5p_1ss22GA         | down |
| GS_009046 | KITA  | Mast/stem cell growth factor receptor kita           | down | ola-miR-16                     | down |
| GS_009046 | KITA  | Mast/stem cell growth factor receptor kita           | down | ola-miR-205_L-1R+1_1ss20TA     | down |
| GS_009046 | KITA  | Mast/stem cell growth factor receptor kita           | down | tmi-miR-15a_R-1                | down |

|           |         |                                                                     |      |                                |      |
|-----------|---------|---------------------------------------------------------------------|------|--------------------------------|------|
| GS_009046 | KITA    | Mast/stem cell growth factor receptor kita                          | down | tmi-miR-16_R-1                 | down |
| GS_009380 | FRPA    | Iron-regulated protein frpA                                         | down | ola-miR-205_L-1R+1_1ss20TA     | down |
| GS_009601 | PLD3A   | 1-phosphatidylinositol 4,5-bisphosphate phosphodiesterase delta-3-A | down | dre-miR-203b-3p_L-1R+2_1ss11CT | down |
| GS_009601 | PLD3A   | 1-phosphatidylinositol 4,5-bisphosphate phosphodiesterase delta-3-A | down | dre-miR-20a-3p_2ss7GA11GA      | down |
| GS_009601 | PLD3A   | 1-phosphatidylinositol 4,5-bisphosphate phosphodiesterase delta-3-A | down | oan-miR-16b-5p_1ss22GA         | down |
| GS_009601 | PLD3A   | 1-phosphatidylinositol 4,5-bisphosphate phosphodiesterase delta-3-A | down | ola-miR-16                     | down |
| GS_009601 | PLD3A   | 1-phosphatidylinositol 4,5-bisphosphate phosphodiesterase delta-3-A | down | tmi-miR-16_R-1                 | down |
| GS_010021 | PHOP1   | Probable phosphatase phospho1                                       | down | dre-miR-20a-3p_2ss7GA11GA      | down |
| GS_010295 | MMP9    | Matrix metalloproteinase-9                                          | down | dre-miR-20a-3p_2ss7GA11GA      | down |
| GS_010316 | GPR61   | Probable G-protein coupled receptor 61                              | down | dre-miR-203b-3p_L-1R+2_1ss11CT | down |
| GS_010503 | -       | -                                                                   | down | pma-miR-1c-3p_1ss2GT           | down |
| GS_011013 | HEBP2   | Heme-binding protein 2                                              | down | PC-5p-43190_23                 | down |
| GS_011014 | -       | -                                                                   | down | dre-miR-26a-5p_R-1_1ss21CT     | down |
| GS_011014 | -       | -                                                                   | down | hhi-miR-26_R+1                 | down |
| GS_011014 | -       | -                                                                   | down | ola-miR-106a_R+2               | down |
| GS_011014 | -       | -                                                                   | down | ola-miR-205_L-1R+1_1ss20TA     | down |
| GS_011090 | RAP1GAP | Rap1 GTPase-activating protein 1                                    | down | ola-miR-205_L-1R+1_1ss20TA     | down |
| GS_011506 | ARG33   | Rho guanine nucleotide exchange factor 33                           | down | PC-5p-26963_57                 | down |
| GS_012029 | TYRP1   | 5,6-dihydroxyindole-2-carboxylic acid oxidase                       | down | dre-miR-203b-3p_L-1R+2_1ss11CT | down |
| GS_012394 | K1B27   | Kallikrein 1-related peptidase b27                                  | down | ola-miR-205_L-1R+1_1ss20TA     | down |
| GS_012394 | K1B27   | Kallikrein 1-related peptidase b27                                  | down | PC-5p-26963_57                 | down |
| GS_012501 | BMP1    | Bone morphogenetic protein 1                                        | down | dre-miR-9-3p_R+1               | down |
| GS_012501 | BMP1    | Bone morphogenetic protein 1                                        | down | ola-miR-106a_R+2               | down |
| GS_012647 | EDNRB   | Endothelin B receptor                                               | down | dre-miR-9-3p_R+1               | down |
| GS_012661 | SOX10   | Transcription factor SOX-10                                         | down | dre-miR-26a-5p_R-1_1ss21CT     | down |
| GS_012661 | SOX10   | Transcription factor SOX-10                                         | down | hhi-miR-26_R+1                 | down |
| GS_013228 | GCH1    | GTP cyclohydrolase 1                                                | down | dre-miR-204-5p_L+1             | down |
| GS_013228 | GCH1    | GTP cyclohydrolase 1                                                | down | dre-miR-204-5p_R+2             | down |
| GS_013252 | SATT    | Neutral amino acid transporter A                                    | down | dre-miR-203b-3p_L-1R+2_1ss11CT | down |
| GS_013252 | SATT    | Neutral amino acid transporter A                                    | down | oan-miR-16b-5p_1ss22GA         | down |
| GS_013252 | SATT    | Neutral amino acid transporter A                                    | down | ola-miR-16                     | down |
| GS_013252 | SATT    | Neutral amino acid transporter A                                    | down | tmi-miR-15a_R-1                | down |
| GS_013252 | SATT    | Neutral amino acid transporter A                                    | down | tmi-miR-16_R-1                 | down |
| GS_013312 | DFP     | Putative defense protein Hdd11-like                                 | down | dre-miR-203b-3p_L-1R+2_1ss11CT | down |
| GS_013459 | SIX3    | Homeobox protein SIX3                                               | down | dre-miR-204-5p_L+1             | down |
| GS_013459 | SIX3    | Homeobox protein SIX3                                               | down | dre-miR-204-5p_R+2             | down |
| GS_013459 | SIX3    | Homeobox protein SIX3                                               | down | PC-5p-46961_19                 | down |

|           |          |                                                                   |      |                                |      |
|-----------|----------|-------------------------------------------------------------------|------|--------------------------------|------|
| GS_013586 | RASEF    | Ras and EF-hand domain-containing protein                         | down | PC-5p-43190_23                 | down |
| GS_013618 | PRDM1    | PR domain zinc finger protein 1                                   | down | dre-miR-204-5p_L+1             | down |
| GS_013618 | PRDM1    | PR domain zinc finger protein 1                                   | down | dre-miR-204-5p_R+2             | down |
| GS_013701 | RASFA    | Ras association domain-containing protein 10                      | down | oan-miR-16b-5p_1ss22GA         | down |
| GS_013701 | RASFA    | Ras association domain-containing protein 10                      | down | ola-miR-16                     | down |
| GS_013701 | RASFA    | Ras association domain-containing protein 10                      | down | tni-miR-15a_R-1                | down |
| GS_013701 | RASFA    | Ras association domain-containing protein 10                      | down | tni-miR-16_R-1                 | down |
| GS_014384 | RETST    | Putative all-trans-retinol 13,14-reductase                        | down | ola-miR-205_L-1R+1_1ss20TA     | down |
| GS_014478 | TBX19    | T-box transcription factor TBX19                                  | down | dre-miR-20a-3p_2ss7GA11GA      | down |
| GS_014490 | XDH      | Xanthine dehydrogenase/oxidase                                    | down | ola-miR-205_L-1R+1_1ss20TA     | down |
| GS_014502 | CDK15    | Cyclin-dependent kinase 15                                        | down | pma-miR-1c-3p_1ss2GT           | down |
| GS_014594 | FCAMR    | High affinity immunoglobulin alpha and immunoglobulin mu Fc       | down | dre-miR-203b-3p_L-1R+2_1ss11CT | down |
| GS_014684 | GTR5     | Solute carrier family 2, facilitated glucose transporter member 5 | down | dre-miR-204-5p_L+1             | down |
| GS_014684 | GTR5     | Solute carrier family 2, facilitated glucose transporter member 5 | down | dre-miR-204-5p_R+2             | down |
| GS_014685 | GTR5     | Solute carrier family 2, facilitated glucose transporter member 5 | down | dre-miR-9-3p_R+1               | down |
| GS_014685 | GTR5     | Solute carrier family 2, facilitated glucose transporter member 5 | down | pma-miR-1c-3p_1ss2GT           | down |
| GS_014685 | GTR5     | Solute carrier family 2, facilitated glucose transporter member 5 | down | tni-miR-15a_R-1                | down |
| GS_015091 | PCDH10   | Protocadherin-10                                                  | down | dre-miR-26a-5p_R-1_1ss21CT     | down |
| GS_015091 | PCDH10   | Protocadherin-10                                                  | down | hhi-miR-26_R+1                 | down |
| GS_015091 | PCDH10   | Protocadherin-10                                                  | down | ola-miR-135b_R+3               | down |
| GS_015091 | PCDH10   | Protocadherin-10                                                  | down | tni-miR-135b_R+1               | down |
| GS_015243 | VTCN1    | V-set domain-containing T-cell activation inhibitor 1             | down | ola-miR-205_L-1R+1_1ss20TA     | down |
| GS_015726 | RFT2     | Riboflavin transporter 2                                          | down | dre-miR-26a-5p_R-1_1ss21CT     | down |
| GS_015726 | RFT2     | Riboflavin transporter 2                                          | down | hhi-miR-26_R+1                 | down |
| GS_016285 | S10I     | Ictacalcin                                                        | down | PC-5p-26963_57                 | down |
| GS_016413 | C1ORF106 | Uncharacterized protein C1orf106                                  | down | ola-miR-135b_R+3               | down |
| GS_016413 | C1ORF106 | Uncharacterized protein C1orf106                                  | down | tni-miR-135b_R+1               | down |
| GS_016685 | MSMB     | Beta-microseminoprotein                                           | down | dre-miR-203b-3p_L-1R+2_1ss11CT | down |
| GS_016685 | MSMB     | Beta-microseminoprotein                                           | down | dre-miR-9-3p_R+1               | down |
| GS_016931 | TAC2N    | Tandem C2 domains nuclear protein                                 | down | dre-miR-20a-3p_2ss7GA11GA      | down |
| GS_017984 | LIX1     | Protein limb expression 1                                         | down | dre-miR-204-5p_L+1             | down |
| GS_017984 | LIX1     | Protein limb expression 1                                         | down | dre-miR-204-5p_R+2             | down |
| GS_017985 | CCD42    | Coiled-coil domain-containing protein 42A                         | down | PC-5p-59593_11                 | down |
| GS_018226 | ES1      | ES1 protein homolog, mitochondrial                                | down | dre-miR-20a-3p_2ss7GA11GA      | down |
| GS_018226 | ES1      | ES1 protein homolog, mitochondrial                                | down | ola-miR-205_L-1R+1_1ss20TA     | down |
| GS_018934 | RGR      | RPE-retinal G protein-coupled receptor                            | down | ola-miR-99_R-1                 | down |
| GS_019376 | HS3S6    | Heparan sulfate glucosamine 3-O-sulfotransferase 6                | down | PC-5p-46961_19                 | down |

|           |         |                                                     |      |                            |      |
|-----------|---------|-----------------------------------------------------|------|----------------------------|------|
| GS_019504 | TRPC2   | Short transient receptor potential channel 2        | down | oan-miR-16b-5p_1ss22GA     | down |
| GS_019504 | TRPC2   | Short transient receptor potential channel 2        | down | ola-miR-16                 | down |
| GS_019504 | TRPC2   | Short transient receptor potential channel 2        | down | tni-miR-15a_R-1            | down |
| GS_019504 | TRPC2   | Short transient receptor potential channel 2        | down | tni-miR-16_R-1             | down |
| GS_019678 | MPDZ    | Multiple PDZ domain protein                         | down | oan-miR-16b-5p_1ss22GA     | down |
| GS_019678 | MPDZ    | Multiple PDZ domain protein                         | down | ola-miR-135b_R+3           | down |
| GS_019678 | MPDZ    | Multiple PDZ domain protein                         | down | ola-miR-16                 | down |
| GS_019678 | MPDZ    | Multiple PDZ domain protein                         | down | tni-miR-135b_R+1           | down |
| GS_019678 | MPDZ    | Multiple PDZ domain protein                         | down | tni-miR-15a_R-1            | down |
| GS_019678 | MPDZ    | Multiple PDZ domain protein                         | down | tni-miR-16_R-1             | down |
| GS_020150 | KINH    | Kinesin-1 heavy chain                               | down | dre-miR-204-5p_L+1         | down |
| GS_020150 | KINH    | Kinesin-1 heavy chain                               | down | dre-miR-204-5p_R+2         | down |
| GS_020150 | KINH    | Kinesin-1 heavy chain                               | down | dre-miR-20a-3p_2ss7GA11GA  | down |
| GS_020150 | KINH    | Kinesin-1 heavy chain                               | down | ola-miR-205_L-1R+1_1ss20TA | down |
| GS_020430 | DES     | Desmin                                              | down | dre-miR-202-5p_R-1         | down |
| GS_020470 | TT39B   | Tetratricopeptide repeat protein 39B                | down | ola-miR-205_L-1R+1_1ss20TA | down |
| GS_020687 | TMEM130 | Transmembrane protein 130                           | down | ola-miR-205_L-1R+1_1ss20TA | down |
| GS_020906 | BACE1   | Beta-secretase 1                                    | down | dre-miR-204-5p_L+1         | down |
| GS_020906 | BACE1   | Beta-secretase 1                                    | down | dre-miR-204-5p_R+2         | down |
| GS_020975 | TYR     | Tyrosinase                                          | down | pma-miR-1c-3p_1ss2GT       | down |
| GS_021002 | PNPH    | Purine nucleoside phosphorylase                     | down | dre-miR-204-5p_R+2         | down |
| GS_021002 | PNPH    | Purine nucleoside phosphorylase                     | down | ola-miR-135b_R+3           | down |
| GS_021037 | IL17REL | Putative interleukin-17 receptor E-like             | down | dre-miR-204-5p_L+1         | down |
| GS_021046 | WNT7B   | Protein Wnt-7b                                      | down | ola-miR-205_L-1R+1_1ss20TA | down |
| GS_021169 | NSG2    | Neuron-specific protein family member 2             | down | dre-miR-20a-3p_2ss7GA11GA  | down |
| GS_021169 | NSG2    | Neuron-specific protein family member 2             | down | dre-miR-26a-5p_R-1_1ss21CT | down |
| GS_021169 | NSG2    | Neuron-specific protein family member 2             | down | hhi-miR-26_R+1             | down |
| GS_000465 | CO1A2   | Collagen alpha-2(I) chain (Fragment)                | up   | hsa-miR-27a-3p_R+1         | up   |
| GS_001591 | NKX11   | transcription factor-related protein 1              | up   | pol-miR-199a-5p_R+1        | up   |
| GS_002131 | MSTN1   | Musculoskeletal embryonic nuclear protein 1         | up   | pol-miR-199a-5p_R+1        | up   |
| GS_002994 | CRP     | C-reactive protein                                  | up   | hsa-miR-27a-3p_R+1         | up   |
| GS_002994 | CRP     | C-reactive protein                                  | up   | mmu-miR-143-5p_R+2         | up   |
| GS_006975 | GLRK    | Probable glutamate receptor                         | up   | pol-miR-199a-5p_R+1        | up   |
| GS_007481 | KCC1G   | Calcium/calmodulin-dependent protein kinase type 1G | up   | oan-miR-139-3p_R-1_1ss8AC  | up   |
| GS_009938 | DHB14   | 17-beta-hydroxysteroid dehydrogenase 14             | up   | mmu-miR-143-5p_R+2         | up   |
| GS_010525 | FABPI   | Fatty acid-binding protein, intestinal              | up   | pol-miR-199a-5p_R+1        | up   |
| GS_011788 | -       | -                                                   | up   | hsa-miR-205-5p_R+2         | up   |

|           |       |                                               |    |                     |    |
|-----------|-------|-----------------------------------------------|----|---------------------|----|
| GS_011788 | -     | -                                             | up | tmi-miR-205         | up |
| GS_011843 | GNS   | N-acetylglucosamine-6-sulfatase               | up | hsa-miR-27a-3p_R+1  | up |
| GS_013015 | PE2R3 | Prostaglandin E2 receptor EP3 subtype         | up | pol-miR-199a-5p_R+1 | up |
| GS_014186 | MSLNL | Mesothelin-like protein                       | up | mmu-miR-143-5p_R+2  | up |
| GS_018185 | HAVR1 | Hepatitis A virus cellular receptor 1 homolog | up | hsa-miR-205-5p_R+2  | up |
| GS_018185 | HAVR1 | Hepatitis A virus cellular receptor 1 homolog | up | tmi-miR-205         | up |
| GS_018739 | EPD   | Ependymin                                     | up | ola-miR-30c_1ss21AG | up |
| GS_019550 | CXA3  | Gap junction alpha-3 protein                  | up | mmu-miR-143-5p_R+2  | up |
| GS_019550 | CXA3  | Gap junction alpha-3 protein                  | up | pol-miR-199a-5p_R+1 | up |

---
